# Supplementary material for: Cleavage mechanism of the aliphatic C–C bond catalyzed by 2,4′-dihydroxyacetophenone dioxygenase from Alcaligenes sp. 4HAP: a QM/MM study
Source: Royal Society of Chemistry journal article supplement (doi:10.1039/c6cy02553f), 2017-01-01
Supplement: c6cy02553f1.pdf [file c6cy02553f1.pdf]

# Cleavage Mechanism of Aliphatic C-C bond Catalyzed by 2,4'- Dihydroxyacetophenone Dioxygenase from *Alcaligenes* sp. 4HAP: A QM/MM Study

Shujun Zhang, Xiya Wang, Yongjun Liu

School of Chemistry and Chemical Engineering, Shandong University, Jinan, Shandong 250100, China

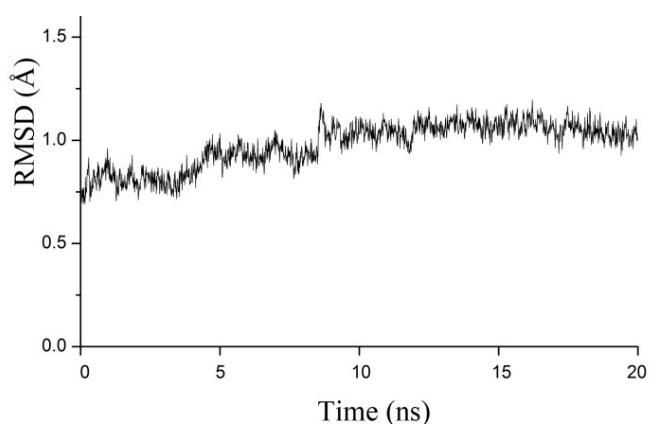

Figure S1. RMSD of DAD in complex with 2,4'-DHAP obtained from 20 ns MD simulation. The reference structure for RMSD is the energy-minimized structure of enzyme-substrate complex which was carried out before MD simulation. Before the molecular dynamics (MD) simulation, the system had been slowly heated from 0 K to 300 K for 200 ps and additional 200ps equilibration, which was not included in the MD simulation, thus, the initial value of RMSD is not zero.

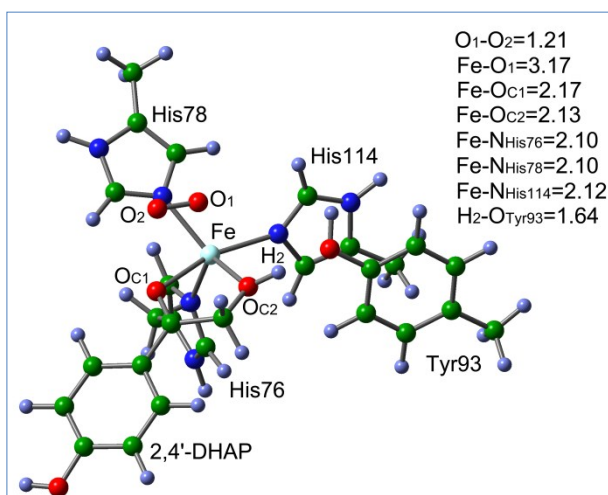

Figure S2. QM/MM optimized structure of ESO2 complex at septet spin state. Distances are given in angstrom.

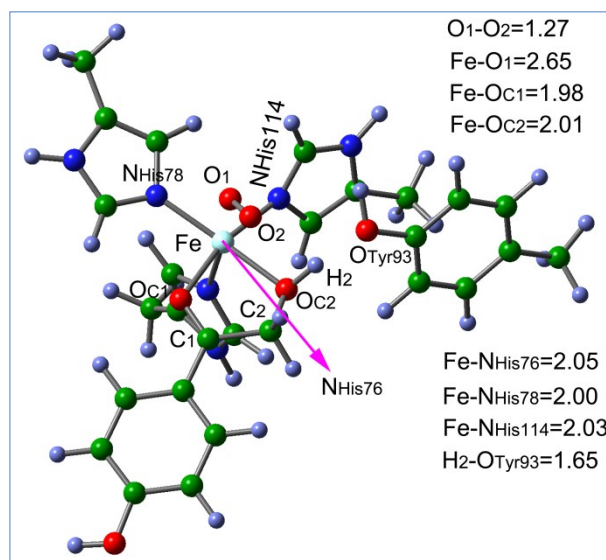

Figure S3. QM/MM optimized structure of ESO2 complex at open-shell singlet spin state. Distances are given in angstrom.

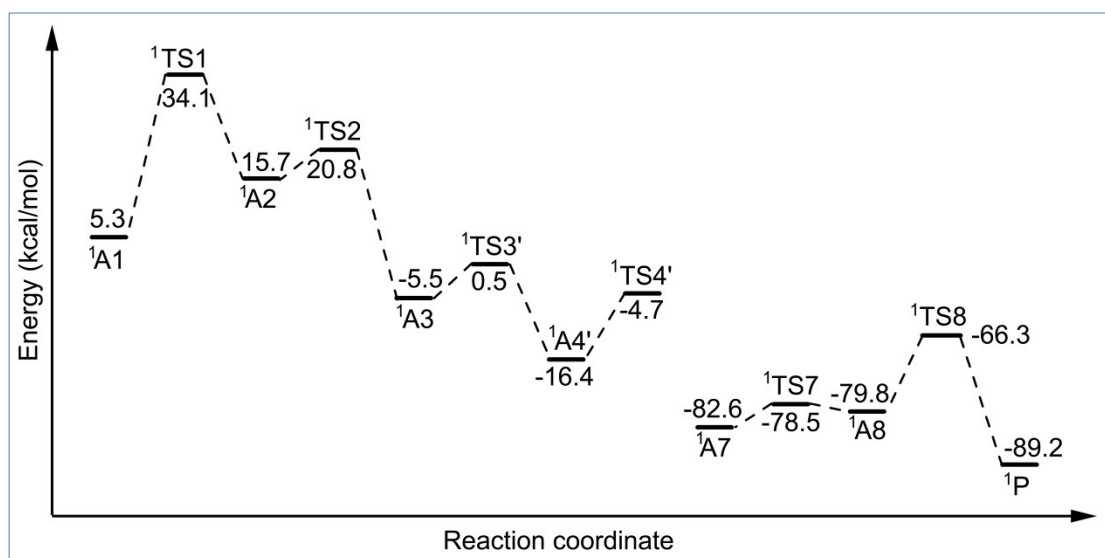

Figure S4. Potential energy profile of the catalytic reaction of DAD enzyme at open-shell singlet state surface. All energies are given in kcal/mol relative to  $^5A_1$ . In the open-shell singlet state, A5 and A6 were not recognized on the basis of our calculations.

Table S1 The definitions of the reaction coordinates along the catalytic path.

---

|        |                                                                                                           |
|--------|-----------------------------------------------------------------------------------------------------------|
| A1-A2  | R(C <sub>2</sub> -H <sub>1</sub> )-R(H <sub>1</sub> -O <sub>2</sub> )                                     |
| A2-A3  | R(Fe-O <sub>1</sub> )-R(O <sub>1</sub> -C <sub>2</sub> )                                                  |
| A3-A4  | R(O <sub>2</sub> -H <sub>1</sub> )-R(O <sub>C1</sub> -H <sub>1</sub> )-R(O <sub>2</sub> -C <sub>1</sub> ) |
| A4-P   | R(O <sub>1</sub> -O <sub>2</sub> )-R(C <sub>1</sub> -O <sub>2</sub> )-R(C <sub>2</sub> -O <sub>1</sub> )  |
| A3-A4' | dihedral(O <sub>21</sub> -O <sub>20</sub> -C <sub>13</sub> -C <sub>12</sub> )                             |
| A4'-A5 | R(O <sub>1</sub> -O <sub>2</sub> )-R(Fe-O <sub>2</sub> )                                                  |
| A5-A6  | R(C <sub>1</sub> -C <sub>2</sub> )-R(O <sub>1</sub> -C <sub>1</sub> )                                     |
| A6-A7  | R(Fe-O <sub>2</sub> )-R(O <sub>2</sub> -C <sub>2</sub> )                                                  |
| A7-A8  | dihedral(H <sub>1</sub> -O <sub>2</sub> -C <sub>2</sub> -O <sub>1</sub> )                                 |
| A8-P   | R(O <sub>2</sub> -H <sub>1</sub> )-R(O <sub>C1</sub> -H <sub>1</sub> )                                    |

---

Absolute QM/MM single-point energies, zero point energies, and Cartesian coordinates of QM regions of all computed species

Model <sup>5</sup>A1

E=-3130.499657 au ZPE=0.5613524043 au

|   |        |        |        |
|---|--------|--------|--------|
| C | 8.920  | 6.423  | -3.470 |
| H | 8.409  | 7.291  | -3.109 |
| H | 8.688  | 6.276  | -4.504 |
| N | 8.481  | 3.932  | -3.166 |
| H | 8.803  | 3.645  | -4.103 |
| C | 8.484  | 5.227  | -2.687 |
| C | 8.129  | 3.107  | -2.160 |
| H | 8.069  | 2.034  | -2.260 |
| N | 7.893  | 3.801  | -1.048 |
| C | 8.101  | 5.126  | -1.375 |
| H | 7.978  | 5.913  | -0.649 |
| C | 7.787  | 7.981  | 3.879  |
| H | 8.528  | 7.606  | 4.554  |
| H | 6.963  | 8.375  | 4.436  |
| N | 6.014  | 6.767  | 2.522  |
| H | 5.303  | 7.505  | 2.661  |
| C | 7.307  | 6.869  | 2.997  |
| C | 5.919  | 5.662  | 1.754  |
| H | 5.010  | 5.322  | 1.281  |
| N | 7.095  | 5.043  | 1.702  |
| C | 7.965  | 5.787  | 2.474  |
| H | 8.995  | 5.496  | 2.586  |
| C | 13.811 | -2.253 | 0.017  |
| H | 14.565 | -2.444 | 0.751  |
| H | 14.146 | -1.483 | -0.646 |
| C | 12.536 | -1.807 | 0.706  |
| C | 11.417 | -1.409 | -0.040 |
| H | 11.465 | -1.444 | -1.120 |
| C | 10.257 | -0.948 | 0.566  |
| H | 9.419  | -0.622 | -0.040 |
| C | 10.198 | -0.855 | 1.956  |
| O | 9.033  | -0.342 | 2.525  |
| H | 9.260  | 0.119  | 3.372  |
| C | 12.435 | -1.739 | 2.100  |
| H | 13.275 | -2.058 | 2.711  |
| C | 11.279 | -1.270 | 2.731  |
| H | 11.233 | -1.212 | 3.814  |
| C | 13.118 | 1.811  | -0.011 |
| H | 13.012 | 0.771  | -0.241 |

|    |        |        |        |
|----|--------|--------|--------|
| H  | 13.935 | 1.945  | 0.666  |
| N  | 11.770 | 2.465  | 1.994  |
| H  | 12.579 | 2.311  | 2.624  |
| C  | 11.856 | 2.313  | 0.623  |
| C  | 10.518 | 2.820  | 2.323  |
| H  | 10.176 | 2.987  | 3.332  |
| N  | 9.768  | 2.924  | 1.220  |
| C  | 10.603 | 2.609  | 0.157  |
| H  | 10.245 | 2.618  | -0.857 |
| C  | 4.264  | 1.261  | -0.808 |
| C  | 2.952  | -0.212 | -2.217 |
| H  | 2.774  | -1.175 | -2.678 |
| C  | 4.019  | -0.010 | -1.371 |
| H  | 4.662  | -0.850 | -1.139 |
| C  | 2.069  | 0.847  | -2.489 |
| O  | 1.030  | 0.570  | -3.296 |
| H  | 0.535  | 1.382  | -3.497 |
| C  | 3.374  | 2.318  | -1.103 |
| H  | 3.540  | 3.289  | -0.652 |
| C  | 2.284  | 2.117  | -1.926 |
| H  | 1.584  | 2.925  | -2.115 |
| C  | 5.418  | 1.510  | 0.022  |
| O  | 5.681  | 2.644  | 0.477  |
| C  | 6.394  | 0.385  | 0.361  |
| H  | 6.481  | -0.333 | -0.459 |
| H  | 6.003  | -0.146 | 1.239  |
| O  | 7.663  | 0.963  | 0.625  |
| H  | 8.129  | 0.487  | 1.368  |
| O  | 7.300  | 2.538  | 2.930  |
| O  | 6.151  | 2.696  | 3.372  |
| Fe | 7.688  | 3.152  | 0.972  |

Model <sup>5</sup>TS1

E=-3130.481161 au ZPE=0.5558587378 au

|   |       |       |        |
|---|-------|-------|--------|
| C | 8.922 | 6.410 | -3.452 |
| H | 8.408 | 7.276 | -3.091 |
| H | 8.685 | 6.259 | -4.484 |
| N | 8.486 | 3.917 | -3.138 |
| H | 8.797 | 3.628 | -4.078 |
| C | 8.498 | 5.214 | -2.663 |
| C | 8.145 | 3.097 | -2.122 |
| H | 8.074 | 2.024 | -2.220 |
| N | 7.928 | 3.795 | -1.010 |
| C | 8.133 | 5.118 | -1.346 |

|   |        |        |        |
|---|--------|--------|--------|
| H | 8.024  | 5.910  | -0.624 |
| C | 7.857  | 8.055  | 3.904  |
| H | 8.599  | 7.692  | 4.584  |
| H | 7.025  | 8.441  | 4.456  |
| N | 6.102  | 6.809  | 2.557  |
| H | 5.378  | 7.534  | 2.701  |
| C | 7.396  | 6.935  | 3.024  |
| C | 6.026  | 5.714  | 1.777  |
| H | 5.123  | 5.357  | 1.306  |
| N | 7.219  | 5.127  | 1.709  |
| C | 8.078  | 5.878  | 2.483  |
| H | 9.117  | 5.612  | 2.577  |
| C | 13.798 | -2.249 | -0.004 |
| H | 14.548 | -2.437 | 0.736  |
| H | 14.137 | -1.482 | -0.669 |
| C | 12.518 | -1.799 | 0.676  |
| C | 11.410 | -1.389 | -0.080 |
| H | 11.470 | -1.422 | -1.158 |
| C | 10.246 | -0.922 | 0.516  |
| H | 9.412  | -0.598 | -0.096 |
| C | 10.178 | -0.837 | 1.905  |
| O | 9.009  | -0.319 | 2.467  |
| H | 9.224  | 0.134  | 3.324  |
| C | 12.405 | -1.738 | 2.069  |
| H | 13.237 | -2.064 | 2.687  |
| C | 11.247 | -1.263 | 2.691  |
| H | 11.191 | -1.210 | 3.773  |
| C | 13.090 | 1.829  | 0.010  |
| H | 12.977 | 0.788  | -0.211 |
| H | 13.911 | 1.964  | 0.683  |
| N | 11.742 | 2.462  | 2.019  |
| H | 12.547 | 2.285  | 2.648  |
| C | 11.834 | 2.344  | 0.645  |
| C | 10.493 | 2.825  | 2.353  |
| H | 10.148 | 2.976  | 3.363  |
| N | 9.751  | 2.969  | 1.247  |
| C | 10.590 | 2.673  | 0.178  |
| H | 10.241 | 2.721  | -0.836 |
| C | 4.254  | 1.271  | -0.696 |
| C | 3.106  | -0.295 | -2.146 |
| H | 2.990  | -1.280 | -2.581 |
| C | 4.087  | -0.032 | -1.211 |
| H | 4.750  | -0.832 | -0.903 |
| C | 2.235  | 0.731  | -2.550 |

|    |       |        |        |
|----|-------|--------|--------|
| O  | 1.289 | 0.406  | -3.451 |
| H  | 0.782 | 1.196  | -3.702 |
| C  | 3.380 | 2.295  | -1.124 |
| H  | 3.495 | 3.292  | -0.717 |
| C  | 2.369 | 2.028  | -2.025 |
| H  | 1.676 | 2.811  | -2.316 |
| C  | 5.381 | 1.608  | 0.139  |
| O  | 5.726 | 2.809  | 0.327  |
| C  | 6.227 | 0.607  | 0.824  |
| H  | 6.016 | -0.460 | 0.796  |
| H  | 5.974 | 1.042  | 2.126  |
| O  | 7.565 | 0.955  | 0.721  |
| H  | 8.127 | 0.464  | 1.416  |
| O  | 7.144 | 2.554  | 2.830  |
| O  | 6.148 | 1.692  | 3.089  |
| Fe | 7.662 | 3.186  | 1.068  |

Model <sup>5</sup>A2

E=-3130.515042 au ZPE=0.5555867853 au

|   |        |        |        |
|---|--------|--------|--------|
| C | 8.880  | 6.365  | -3.408 |
| H | 8.364  | 7.231  | -3.050 |
| H | 8.646  | 6.212  | -4.441 |
| N | 8.446  | 3.873  | -3.091 |
| H | 8.767  | 3.583  | -4.027 |
| C | 8.455  | 5.170  | -2.618 |
| C | 8.085  | 3.056  | -2.079 |
| H | 8.006  | 1.984  | -2.184 |
| N | 7.854  | 3.754  | -0.969 |
| C | 8.072  | 5.076  | -1.305 |
| H | 7.955  | 5.869  | -0.586 |
| C | 7.790  | 8.059  | 3.907  |
| H | 8.528  | 7.680  | 4.582  |
| H | 6.965  | 8.451  | 4.464  |
| N | 6.024  | 6.862  | 2.524  |
| H | 5.311  | 7.597  | 2.664  |
| C | 7.311  | 6.952  | 3.018  |
| C | 5.940  | 5.772  | 1.734  |
| H | 5.038  | 5.451  | 1.236  |
| N | 7.115  | 5.152  | 1.687  |
| C | 7.973  | 5.877  | 2.487  |
| H | 9.000  | 5.581  | 2.612  |
| C | 13.807 | -2.264 | -0.011 |
| H | 14.563 | -2.449 | 0.723  |
| H | 14.133 | -1.488 | -0.672 |

|   |        |        |        |
|---|--------|--------|--------|
| C | 12.527 | -1.835 | 0.679  |
| C | 11.410 | -1.432 | -0.067 |
| H | 11.467 | -1.440 | -1.146 |
| C | 10.236 | -1.010 | 0.542  |
| H | 9.395  | -0.690 | -0.063 |
| C | 10.169 | -0.966 | 1.932  |
| O | 8.976  | -0.516 | 2.513  |
| H | 9.178  | -0.055 | 3.371  |
| C | 12.420 | -1.800 | 2.073  |
| H | 13.262 | -2.118 | 2.681  |
| C | 11.251 | -1.370 | 2.708  |
| H | 11.197 | -1.337 | 3.792  |
| C | 13.055 | 1.797  | 0.045  |
| H | 12.950 | 0.757  | -0.182 |
| H | 13.876 | 1.934  | 0.717  |
| N | 11.711 | 2.420  | 2.061  |
| H | 12.523 | 2.252  | 2.684  |
| C | 11.795 | 2.298  | 0.686  |
| C | 10.463 | 2.781  | 2.402  |
| H | 10.127 | 2.949  | 3.414  |
| N | 9.714  | 2.916  | 1.300  |
| C | 10.545 | 2.617  | 0.227  |
| H | 10.189 | 2.660  | -0.786 |
| C | 4.328  | 1.165  | -0.749 |
| C | 3.103  | -0.298 | -2.247 |
| H | 2.956  | -1.257 | -2.728 |
| C | 4.131  | -0.096 | -1.354 |
| H | 4.791  | -0.924 | -1.124 |
| C | 2.221  | 0.756  | -2.546 |
| O | 1.234  | 0.486  | -3.419 |
| H | 0.730  | 1.293  | -3.618 |
| C | 3.436  | 2.214  | -1.064 |
| H | 3.569  | 3.180  | -0.592 |
| C | 2.390  | 2.015  | -1.944 |
| H | 1.691  | 2.818  | -2.154 |
| C | 5.462  | 1.423  | 0.111  |
| O | 5.698  | 2.607  | 0.566  |
| C | 6.404  | 0.401  | 0.444  |
| H | 6.229  | -0.667 | 0.371  |
| H | 5.370  | 2.718  | 2.454  |
| O | 7.579  | 0.827  | 0.890  |
| H | 8.105  | 0.226  | 1.548  |
| O | 7.185  | 2.683  | 2.955  |
| O | 5.839  | 2.678  | 3.318  |

|    |       |       |       |
|----|-------|-------|-------|
| Fe | 7.632 | 3.165 | 1.139 |
|----|-------|-------|-------|

Model <sup>5</sup>TS2

E=-3130.495990 au ZPE=0.5615801553 au

|   |        |        |        |
|---|--------|--------|--------|
| C | 8.936  | 6.470  | -3.454 |
| H | 8.428  | 7.344  | -3.102 |
| H | 8.699  | 6.310  | -4.485 |
| N | 8.463  | 3.991  | -3.127 |
| H | 8.763  | 3.693  | -4.067 |
| C | 8.502  | 5.287  | -2.655 |
| C | 8.135  | 3.179  | -2.101 |
| H | 8.046  | 2.107  | -2.196 |
| N | 7.957  | 3.883  | -0.986 |
| C | 8.171  | 5.199  | -1.327 |
| H | 8.089  | 5.992  | -0.600 |
| C | 7.822  | 8.020  | 3.924  |
| H | 8.571  | 7.656  | 4.596  |
| H | 7.000  | 8.414  | 4.485  |
| N | 6.056  | 6.814  | 2.557  |
| H | 5.353  | 7.563  | 2.675  |
| C | 7.342  | 6.898  | 3.057  |
| C | 5.955  | 5.698  | 1.810  |
| H | 5.057  | 5.389  | 1.298  |
| N | 7.117  | 5.048  | 1.803  |
| C | 7.988  | 5.791  | 2.572  |
| H | 9.012  | 5.488  | 2.696  |
| C | 13.803 | -2.270 | -0.001 |
| H | 14.544 | -2.459 | 0.748  |
| H | 14.148 | -1.498 | -0.657 |
| C | 12.513 | -1.829 | 0.664  |
| C | 11.415 | -1.426 | -0.109 |
| H | 11.492 | -1.457 | -1.186 |
| C | 10.238 | -0.971 | 0.466  |
| H | 9.412  | -0.657 | -0.163 |
| C | 10.147 | -0.889 | 1.853  |
| O | 8.961  | -0.373 | 2.388  |
| H | 9.148  | 0.062  | 3.262  |
| C | 12.376 | -1.772 | 2.055  |
| H | 13.200 | -2.093 | 2.686  |
| C | 11.203 | -1.307 | 2.658  |
| H | 11.130 | -1.257 | 3.739  |
| C | 13.037 | 1.806  | 0.058  |
| H | 12.935 | 0.765  | -0.167 |
| H | 13.855 | 1.946  | 0.733  |

|                                       |        |        |        |   |        |        |        |
|---------------------------------------|--------|--------|--------|---|--------|--------|--------|
| N                                     | 11.679 | 2.433  | 2.066  | C | 7.906  | 8.002  | 3.947  |
| H                                     | 12.487 | 2.268  | 2.694  | H | 8.667  | 7.644  | 4.608  |
| C                                     | 11.774 | 2.306  | 0.692  | H | 7.096  | 8.402  | 4.520  |
| C                                     | 10.423 | 2.779  | 2.396  | N | 6.111  | 6.779  | 2.636  |
| H                                     | 10.080 | 2.940  | 3.407  | H | 5.411  | 7.529  | 2.762  |
| N                                     | 9.679  | 2.901  | 1.290  | C | 7.409  | 6.873  | 3.102  |
| C                                     | 10.523 | 2.607  | 0.225  | C | 6.000  | 5.664  | 1.888  |
| H                                     | 10.178 | 2.641  | -0.792 | H | 5.094  | 5.342  | 1.399  |
| C                                     | 4.259  | 1.184  | -0.686 | N | 7.167  | 5.022  | 1.849  |
| C                                     | 3.167  | -0.417 | -2.139 | C | 8.050  | 5.772  | 2.598  |
| H                                     | 3.088  | -1.404 | -2.576 | H | 9.079  | 5.478  | 2.696  |
| C                                     | 4.131  | -0.126 | -1.192 | C | 13.672 | -2.172 | -0.006 |
| H                                     | 4.823  | -0.902 | -0.880 | H | 14.444 | -2.332 | 0.718  |
| C                                     | 2.272  | 0.583  | -2.558 | H | 13.980 | -1.412 | -0.693 |
| O                                     | 1.349  | 0.238  | -3.479 | C | 12.400 | -1.732 | 0.699  |
| H                                     | 0.832  | 1.019  | -3.735 | C | 11.263 | -1.333 | -0.021 |
| C                                     | 3.356  | 2.179  | -1.124 | H | 11.284 | -1.376 | -1.102 |
| H                                     | 3.441  | 3.183  | -0.727 | C | 10.122 | -0.854 | 0.614  |
| C                                     | 2.359  | 1.882  | -2.029 | H | 9.263  | -0.533 | 0.034  |
| H                                     | 1.646  | 2.644  | -2.327 | C | 10.104 | -0.747 | 2.004  |
| C                                     | 5.393  | 1.593  | 0.110  | O | 8.969  | -0.209 | 2.613  |
| O                                     | 5.723  | 2.821  | 0.156  | H | 9.240  | 0.282  | 3.431  |
| C                                     | 6.289  | 0.665  | 0.790  | C | 12.334 | -1.654 | 2.095  |
| H                                     | 5.978  | -0.294 | 1.190  | H | 13.189 | -1.971 | 2.686  |
| H                                     | 5.043  | 3.061  | 2.391  | C | 11.200 | -1.171 | 2.752  |
| O                                     | 7.594  | 0.902  | 0.635  | H | 11.183 | -1.105 | 3.835  |
| H                                     | 8.153  | 0.395  | 1.344  | C | 13.148 | 1.810  | -0.089 |
| O                                     | 6.685  | 2.127  | 2.503  | H | 13.043 | 0.772  | -0.328 |
| O                                     | 5.571  | 2.733  | 3.143  | H | 13.958 | 1.937  | 0.599  |
| Fe                                    | 7.583  | 3.150  | 1.036  | N | 11.799 | 2.519  | 1.895  |
| Model <sup>5</sup> A3                 |        |        |        | H | 12.605 | 2.387  | 2.534  |
| E=-3130.559584 au ZPE=0.5669586703 au |        |        |        | C | 11.881 | 2.309  | 0.534  |
| C                                     | 8.963  | 6.509  | -3.549 | C | 10.546 | 2.891  | 2.209  |
| H                                     | 8.464  | 7.383  | -3.187 | H | 10.206 | 3.090  | 3.212  |
| H                                     | 8.746  | 6.379  | -4.589 | N | 9.792  | 2.944  | 1.107  |
| N                                     | 8.465  | 4.026  | -3.282 | C | 10.624 | 2.581  | 0.058  |
| H                                     | 8.789  | 3.740  | -4.219 | H | 10.263 | 2.552  | -0.955 |
| C                                     | 8.489  | 5.315  | -2.789 | C | 4.294  | 1.427  | -0.608 |
| C                                     | 8.086  | 3.196  | -2.290 | C | 3.334  | -0.267 | -2.051 |
| H                                     | 7.996  | 2.127  | -2.407 | H | 3.251  | -1.290 | -2.397 |
| N                                     | 7.853  | 3.884  | -1.174 | C | 4.170  | 0.078  | -1.005 |
| C                                     | 8.091  | 5.208  | -1.483 | H | 4.751  | -0.699 | -0.520 |
| H                                     | 7.978  | 5.992  | -0.750 | C | 2.555  | 0.719  | -2.682 |
|                                       |        |        |        | O | 1.734  | 0.319  | -3.673 |

|    |       |        |        |
|----|-------|--------|--------|
| H  | 1.243 | 1.081  | -4.022 |
| C  | 3.521 | 2.409  | -1.271 |
| H  | 3.593 | 3.440  | -0.948 |
| C  | 2.651 | 2.063  | -2.282 |
| H  | 2.037 | 2.819  | -2.759 |
| C  | 5.215 | 1.876  | 0.406  |
| O  | 5.518 | 3.078  | 0.545  |
| C  | 5.989 | 0.960  | 1.382  |
| H  | 5.677 | -0.088 | 1.401  |
| H  | 4.430 | 2.680  | 2.739  |
| O  | 7.341 | 1.116  | 1.030  |
| H  | 7.947 | 0.597  | 1.655  |
| O  | 5.922 | 1.526  | 2.693  |
| O  | 4.532 | 1.752  | 3.017  |
| Fe | 7.735 | 3.292  | 0.829  |

Model <sup>5</sup>TS3'

E=-3130.553974 au ZPE=0.5666156908 au

|   |        |        |        |
|---|--------|--------|--------|
| C | 8.983  | 6.543  | -3.575 |
| H | 8.489  | 7.423  | -3.218 |
| H | 8.771  | 6.412  | -4.616 |
| N | 8.462  | 4.066  | -3.303 |
| H | 8.787  | 3.772  | -4.238 |
| C | 8.495  | 5.357  | -2.816 |
| C | 8.077  | 3.244  | -2.308 |
| H | 7.979  | 2.175  | -2.420 |
| N | 7.849  | 3.939  | -1.196 |
| C | 8.094  | 5.260  | -1.510 |
| H | 7.986  | 6.049  | -0.781 |
| C | 7.905  | 8.019  | 3.950  |
| H | 8.665  | 7.666  | 4.615  |
| H | 7.095  | 8.425  | 4.519  |
| N | 6.105  | 6.775  | 2.662  |
| H | 5.403  | 7.525  | 2.785  |
| C | 7.407  | 6.883  | 3.114  |
| C | 5.993  | 5.652  | 1.927  |
| H | 5.086  | 5.318  | 1.448  |
| N | 7.167  | 5.018  | 1.883  |
| C | 8.052  | 5.783  | 2.614  |
| H | 9.085  | 5.499  | 2.703  |
| C | 13.653 | -2.158 | -0.013 |
| H | 14.430 | -2.313 | 0.706  |
| H | 13.955 | -1.401 | -0.707 |
| C | 12.385 | -1.717 | 0.698  |

|    |        |        |        |
|----|--------|--------|--------|
| C  | 11.247 | -1.303 | -0.013 |
| H  | 11.261 | -1.337 | -1.095 |
| C  | 10.116 | -0.813 | 0.632  |
| H  | 9.258  | -0.474 | 0.060  |
| C  | 10.108 | -0.713 | 2.023  |
| O  | 8.986  | -0.161 | 2.643  |
| H  | 9.271  | 0.315  | 3.465  |
| C  | 12.326 | -1.649 | 2.095  |
| H  | 13.180 | -1.980 | 2.679  |
| C  | 11.202 | -1.157 | 2.762  |
| H  | 11.191 | -1.098 | 3.846  |
| C  | 13.154 | 1.824  | -0.094 |
| H  | 13.042 | 0.786  | -0.329 |
| H  | 13.966 | 1.949  | 0.592  |
| N  | 11.809 | 2.534  | 1.891  |
| H  | 12.612 | 2.390  | 2.530  |
| C  | 11.892 | 2.334  | 0.529  |
| C  | 10.559 | 2.920  | 2.204  |
| H  | 10.220 | 3.113  | 3.209  |
| N  | 9.810  | 2.992  | 1.101  |
| C  | 10.639 | 2.626  | 0.052  |
| H  | 10.279 | 2.608  | -0.962 |
| C  | 4.251  | 1.443  | -0.576 |
| C  | 3.282  | -0.225 | -2.045 |
| H  | 3.195  | -1.243 | -2.406 |
| C  | 4.116  | 0.100  | -0.992 |
| H  | 4.690  | -0.691 | -0.521 |
| C  | 2.513  | 0.774  | -2.666 |
| O  | 1.701  | 0.390  | -3.670 |
| H  | 1.217  | 1.158  | -4.016 |
| C  | 3.482  | 2.437  | -1.224 |
| H  | 3.560  | 3.463  | -0.889 |
| C  | 2.613  | 2.110  | -2.243 |
| H  | 2.005  | 2.878  | -2.708 |
| C  | 5.215  | 1.876  | 0.406  |
| O  | 5.566  | 3.064  | 0.519  |
| C  | 5.999  | 0.908  | 1.324  |
| H  | 5.883  | -0.153 | 1.091  |
| H  | 5.114  | 2.831  | 3.087  |
| O  | 7.362  | 1.273  | 1.145  |
| H  | 7.973  | 0.718  | 1.727  |
| O  | 5.674  | 1.061  | 2.697  |
| O  | 4.610  | 2.016  | 2.916  |
| Fe | 7.750  | 3.336  | 0.797  |



Model <sup>5</sup>A4'

E=-3130.560055 au ZPE=0.5650352558 au

|   |        |        |        |
|---|--------|--------|--------|
| C | 8.986  | 6.545  | -3.554 |
| H | 8.489  | 7.420  | -3.189 |
| H | 8.764  | 6.417  | -4.593 |
| N | 8.479  | 4.066  | -3.292 |
| H | 8.793  | 3.781  | -4.233 |
| C | 8.515  | 5.352  | -2.794 |
| C | 8.115  | 3.233  | -2.299 |
| H | 8.018  | 2.164  | -2.421 |
| N | 7.901  | 3.916  | -1.177 |
| C | 8.137  | 5.241  | -1.483 |
| H | 8.035  | 6.022  | -0.744 |
| C | 7.924  | 7.999  | 3.964  |
| H | 8.691  | 7.657  | 4.627  |
| H | 7.115  | 8.404  | 4.534  |
| N | 6.115  | 6.715  | 2.733  |
| H | 5.407  | 7.457  | 2.863  |
| C | 7.429  | 6.853  | 3.141  |
| C | 6.002  | 5.587  | 2.006  |
| H | 5.083  | 5.220  | 1.577  |
| N | 7.187  | 4.980  | 1.922  |
| C | 8.079  | 5.766  | 2.623  |
| H | 9.121  | 5.502  | 2.677  |
| C | 13.602 | -2.129 | -0.006 |
| H | 14.392 | -2.270 | 0.702  |
| H | 13.883 | -1.373 | -0.709 |
| C | 12.339 | -1.698 | 0.723  |
| C | 11.187 | -1.287 | 0.034  |
| H | 11.182 | -1.311 | -1.048 |
| C | 10.061 | -0.811 | 0.704  |
| H | 9.191  | -0.473 | 0.150  |
| C | 10.074 | -0.725 | 2.095  |
| O | 8.959  | -0.196 | 2.749  |
| H | 9.267  | 0.292  | 3.556  |
| C | 12.303 | -1.639 | 2.122  |
| H | 13.170 | -1.966 | 2.689  |
| C | 11.186 | -1.164 | 2.812  |
| H | 11.193 | -1.113 | 3.896  |
| C | 13.170 | 1.824  | -0.089 |
| H | 13.067 | 0.787  | -0.331 |
| H | 13.981 | 1.951  | 0.597  |
| N | 11.823 | 2.526  | 1.900  |
| H | 12.630 | 2.395  | 2.538  |

|    |        |        |        |
|----|--------|--------|--------|
| C  | 11.903 | 2.319  | 0.539  |
| C  | 10.570 | 2.900  | 2.214  |
| H  | 10.233 | 3.100  | 3.218  |
| N  | 9.815  | 2.956  | 1.115  |
| C  | 10.645 | 2.592  | 0.066  |
| H  | 10.284 | 2.565  | -0.948 |
| C  | 4.222  | 1.437  | -0.555 |
| C  | 3.250  | -0.226 | -2.027 |
| H  | 3.170  | -1.242 | -2.394 |
| C  | 4.089  | 0.097  | -0.974 |
| H  | 4.668  | -0.694 | -0.509 |
| C  | 2.477  | 0.773  | -2.641 |
| O  | 1.664  | 0.393  | -3.648 |
| H  | 1.180  | 1.163  | -3.988 |
| C  | 3.451  | 2.431  | -1.196 |
| H  | 3.533  | 3.457  | -0.860 |
| C  | 2.573  | 2.106  | -2.210 |
| H  | 1.961  | 2.875  | -2.668 |
| C  | 5.215  | 1.876  | 0.406  |
| O  | 5.609  | 3.053  | 0.432  |
| C  | 5.898  | 0.934  | 1.412  |
| H  | 5.799  | -0.129 | 1.175  |
| H  | 6.021  | 2.486  | 3.625  |
| O  | 7.260  | 1.324  | 1.430  |
| H  | 7.866  | 0.699  | 1.937  |
| O  | 5.297  | 1.010  | 2.681  |
| O  | 5.200  | 2.392  | 3.113  |
| Fe | 7.747  | 3.309  | 0.814  |

Model <sup>5</sup>TS4'

E=-3130.545158 au ZPE=0.5642942460 au

|   |       |       |        |
|---|-------|-------|--------|
| C | 8.939 | 6.444 | -3.471 |
| H | 8.435 | 7.317 | -3.112 |
| H | 8.703 | 6.295 | -4.504 |
| N | 8.470 | 3.957 | -3.155 |
| H | 8.779 | 3.662 | -4.093 |
| C | 8.497 | 5.255 | -2.683 |
| C | 8.121 | 3.143 | -2.137 |
| H | 8.030 | 2.071 | -2.231 |
| N | 7.915 | 3.847 | -1.026 |
| C | 8.135 | 5.166 | -1.365 |
| H | 8.032 | 5.961 | -0.643 |
| C | 7.903 | 8.063 | 3.914  |
| H | 8.646 | 7.687 | 4.586  |

|   |        |        |        |
|---|--------|--------|--------|
| H | 7.082  | 8.458  | 4.475  |
| N | 6.120  | 6.849  | 2.576  |
| H | 5.407  | 7.581  | 2.729  |
| C | 7.418  | 6.953  | 3.035  |
| C | 6.026  | 5.758  | 1.788  |
| H | 5.117  | 5.413  | 1.322  |
| N | 7.208  | 5.155  | 1.710  |
| C | 8.080  | 5.888  | 2.484  |
| H | 9.115  | 5.607  | 2.570  |
| C | 13.799 | -2.246 | -0.012 |
| H | 14.557 | -2.429 | 0.720  |
| H | 14.129 | -1.482 | -0.684 |
| C | 12.527 | -1.795 | 0.680  |
| C | 11.396 | -1.422 | -0.062 |
| H | 11.433 | -1.486 | -1.141 |
| C | 10.240 | -0.956 | 0.546  |
| H | 9.385  | -0.665 | -0.055 |
| C | 10.201 | -0.829 | 1.934  |
| O | 9.042  | -0.311 | 2.501  |
| H | 9.269  | 0.158  | 3.339  |
| C | 12.444 | -1.696 | 2.073  |
| H | 13.292 | -1.997 | 2.681  |
| C | 11.293 | -1.218 | 2.706  |
| H | 11.256 | -1.138 | 3.787  |
| C | 13.118 | 1.777  | -0.054 |
| H | 13.006 | 0.741  | -0.295 |
| H | 13.937 | 1.899  | 0.624  |
| N | 11.808 | 2.509  | 1.946  |
| H | 12.632 | 2.396  | 2.566  |
| C | 11.860 | 2.280  | 0.586  |
| C | 10.561 | 2.871  | 2.285  |
| H | 10.248 | 3.088  | 3.292  |
| N | 9.779  | 2.901  | 1.200  |
| C | 10.591 | 2.535  | 0.135  |
| H | 10.210 | 2.488  | -0.869 |
| C | 4.275  | 1.394  | -0.587 |
| C | 3.258  | -0.232 | -2.071 |
| H | 3.164  | -1.238 | -2.462 |
| C | 4.135  | 0.065  | -1.044 |
| H | 4.736  | -0.734 | -0.625 |
| C | 2.460  | 0.783  | -2.626 |
| O | 1.614  | 0.428  | -3.612 |
| H | 1.124  | 1.206  | -3.925 |
| C | 3.474  | 2.404  | -1.167 |

|    |       |        |        |
|----|-------|--------|--------|
| H  | 3.563 | 3.419  | -0.802 |
| C  | 2.565 | 2.105  | -2.159 |
| H  | 1.932 | 2.883  | -2.573 |
| C  | 5.290 | 1.789  | 0.358  |
| O  | 5.623 | 2.985  | 0.501  |
| C  | 6.129 | 0.797  | 1.194  |
| H  | 5.748 | -0.235 | 1.153  |
| H  | 7.636 | 2.118  | 3.417  |
| O  | 7.441 | 0.909  | 0.650  |
| H  | 8.055 | 0.458  | 1.295  |
| O  | 6.114 | 1.076  | 2.548  |
| O  | 7.042 | 2.538  | 2.772  |
| Fe | 7.690 | 3.218  | 1.022  |

Model <sup>5</sup>A5

E=-3130.563673 au ZPE=0.5594894907 au

|   |        |        |        |
|---|--------|--------|--------|
| C | 8.884  | 6.340  | -3.361 |
| H | 8.361  | 7.205  | -3.010 |
| H | 8.627  | 6.159  | -4.384 |
| N | 8.553  | 3.844  | -2.966 |
| H | 8.862  | 3.544  | -3.903 |
| C | 8.500  | 5.155  | -2.533 |
| C | 8.259  | 3.039  | -1.928 |
| H | 8.270  | 1.963  | -1.986 |
| N | 8.000  | 3.762  | -0.835 |
| C | 8.135  | 5.085  | -1.213 |
| H | 7.987  | 5.892  | -0.515 |
| C | 7.783  | 7.983  | 3.888  |
| H | 8.520  | 7.630  | 4.579  |
| H | 6.941  | 8.363  | 4.428  |
| N | 6.061  | 6.717  | 2.505  |
| H | 5.332  | 7.439  | 2.624  |
| C | 7.342  | 6.853  | 3.006  |
| C | 6.004  | 5.598  | 1.753  |
| H | 5.112  | 5.228  | 1.272  |
| N | 7.195  | 5.007  | 1.737  |
| C | 8.032  | 5.775  | 2.518  |
| H | 9.062  | 5.501  | 2.665  |
| C | 13.860 | -2.279 | -0.009 |
| H | 14.618 | -2.475 | 0.720  |
| H | 14.196 | -1.512 | -0.676 |
| C | 12.593 | -1.823 | 0.689  |
| C | 11.467 | -1.430 | -0.048 |
| H | 11.502 | -1.479 | -1.128 |

|    |        |        |        |
|----|--------|--------|--------|
| C  | 10.314 | -0.964 | 0.566  |
| H  | 9.468  | -0.652 | -0.034 |
| C  | 10.271 | -0.857 | 1.956  |
| O  | 9.118  | -0.334 | 2.536  |
| H  | 9.362  | 0.065  | 3.409  |
| C  | 12.508 | -1.745 | 2.083  |
| H  | 13.353 | -2.062 | 2.687  |
| C  | 11.360 | -1.269 | 2.721  |
| H  | 11.325 | -1.205 | 3.804  |
| C  | 13.227 | 1.802  | -0.018 |
| H  | 13.122 | 0.760  | -0.239 |
| H  | 14.051 | 1.944  | 0.650  |
| N  | 11.898 | 2.531  | 1.986  |
| H  | 12.716 | 2.421  | 2.614  |
| C  | 11.971 | 2.305  | 0.625  |
| C  | 10.646 | 2.887  | 2.312  |
| H  | 10.303 | 3.104  | 3.311  |
| N  | 9.888  | 2.925  | 1.208  |
| C  | 10.712 | 2.564  | 0.156  |
| H  | 10.345 | 2.507  | -0.851 |
| C  | 4.283  | 1.323  | -0.827 |
| C  | 2.972  | -0.161 | -2.216 |
| H  | 2.792  | -1.127 | -2.671 |
| C  | 4.056  | 0.049  | -1.395 |
| H  | 4.711  | -0.775 | -1.149 |
| C  | 2.063  | 0.886  | -2.457 |
| O  | 1.012  | 0.597  | -3.238 |
| H  | 0.493  | 1.399  | -3.418 |
| C  | 3.371  | 2.372  | -1.089 |
| H  | 3.526  | 3.341  | -0.632 |
| C  | 2.267  | 2.156  | -1.889 |
| H  | 1.546  | 2.951  | -2.051 |
| C  | 5.448  | 1.600  | -0.038 |
| O  | 5.723  | 2.652  | 0.529  |
| C  | 6.610  | 0.445  | 0.023  |
| H  | 6.814  | 0.246  | -1.050 |
| H  | 8.034  | 1.850  | 3.021  |
| O  | 7.776  | 1.049  | 0.575  |
| H  | 8.129  | 0.488  | 1.319  |
| O  | 6.143  | -0.589 | 0.657  |
| O  | 7.639  | 2.718  | 2.843  |
| Fe | 7.835  | 3.149  | 1.118  |

Model <sup>5</sup>TS5

E=-3130.537155 au ZPE=0.5578039390 au

|   |        |        |        |
|---|--------|--------|--------|
| C | 8.881  | 6.356  | -3.362 |
| H | 8.365  | 7.228  | -3.017 |
| H | 8.629  | 6.174  | -4.386 |
| N | 8.498  | 3.868  | -2.972 |
| H | 8.801  | 3.564  | -3.909 |
| C | 8.479  | 5.178  | -2.532 |
| C | 8.183  | 3.066  | -1.935 |
| H | 8.154  | 1.990  | -1.998 |
| N | 7.947  | 3.792  | -0.840 |
| C | 8.117  | 5.112  | -1.212 |
| H | 7.993  | 5.919  | -0.508 |
| C | 7.783  | 8.024  | 3.896  |
| H | 8.518  | 7.668  | 4.587  |
| H | 6.945  | 8.414  | 4.436  |
| N | 6.044  | 6.756  | 2.538  |
| H | 5.317  | 7.479  | 2.663  |
| C | 7.331  | 6.893  | 3.020  |
| C | 5.979  | 5.638  | 1.784  |
| H | 5.080  | 5.265  | 1.317  |
| N | 7.169  | 5.050  | 1.748  |
| C | 8.016  | 5.817  | 2.520  |
| H | 9.048  | 5.545  | 2.653  |
| C | 13.921 | -2.328 | 0.008  |
| H | 14.661 | -2.543 | 0.750  |
| H | 14.280 | -1.557 | -0.641 |
| C | 12.646 | -1.865 | 0.685  |
| C | 11.537 | -1.475 | -0.078 |
| H | 11.595 | -1.530 | -1.156 |
| C | 10.370 | -1.009 | 0.506  |
| H | 9.541  | -0.699 | -0.117 |
| C | 10.299 | -0.895 | 1.893  |
| O | 9.129  | -0.368 | 2.448  |
| H | 9.354  | 0.049  | 3.318  |
| C | 12.532 | -1.780 | 2.076  |
| H | 13.364 | -2.093 | 2.700  |
| C | 11.370 | -1.300 | 2.686  |
| H | 11.311 | -1.229 | 3.768  |
| C | 13.177 | 1.794  | -0.021 |
| H | 13.072 | 0.752  | -0.242 |
| H | 13.993 | 1.934  | 0.657  |
| N | 11.840 | 2.553  | 1.961  |
| H | 12.655 | 2.451  | 2.593  |

|                                       |        |        |        |   |        |        |        |
|---------------------------------------|--------|--------|--------|---|--------|--------|--------|
| C                                     | 11.915 | 2.301  | 0.605  | H | 6.910  | 8.371  | 4.442  |
| C                                     | 10.584 | 2.907  | 2.279  | N | 6.014  | 6.759  | 2.492  |
| H                                     | 10.237 | 3.139  | 3.273  | H | 5.297  | 7.494  | 2.609  |
| N                                     | 9.827  | 2.917  | 1.175  | C | 7.291  | 6.864  | 3.011  |
| C                                     | 10.653 | 2.541  | 0.130  | C | 5.942  | 5.646  | 1.733  |
| H                                     | 10.287 | 2.459  | -0.876 | H | 5.048  | 5.298  | 1.239  |
| C                                     | 4.355  | 1.304  | -0.770 | N | 7.120  | 5.030  | 1.728  |
| C                                     | 3.015  | -0.143 | -2.171 | C | 7.964  | 5.773  | 2.527  |
| H                                     | 2.780  | -1.115 | -2.586 | H | 8.984  | 5.474  | 2.691  |
| C                                     | 4.048  | 0.022  | -1.279 | C | 14.020 | -2.398 | -0.061 |
| H                                     | 4.608  | -0.844 | -0.949 | H | 14.799 | -2.624 | 0.637  |
| C                                     | 2.221  | 0.961  | -2.535 | H | 14.349 | -1.626 | -0.725 |
| O                                     | 1.196  | 0.709  | -3.359 | C | 12.791 | -1.929 | 0.689  |
| H                                     | 0.721  | 1.529  | -3.583 | C | 11.634 | -1.541 | -0.003 |
| C                                     | 3.573  | 2.410  | -1.168 | H | 11.606 | -1.631 | -1.080 |
| H                                     | 3.782  | 3.386  | -0.748 | C | 10.528 | -1.028 | 0.657  |
| C                                     | 2.507  | 2.244  | -2.029 | H | 9.652  | -0.722 | 0.095  |
| H                                     | 1.869  | 3.086  | -2.276 | C | 10.577 | -0.866 | 2.040  |
| C                                     | 5.471  | 1.526  | 0.128  | O | 9.475  | -0.272 | 2.652  |
| O                                     | 5.798  | 2.622  | 0.644  | H | 9.747  | 0.182  | 3.494  |
| C                                     | 6.677  | 0.404  | 0.085  | C | 12.783 | -1.814 | 2.082  |
| H                                     | 6.725  | -0.229 | -0.809 | H | 13.648 | -2.145 | 2.650  |
| H                                     | 8.010  | 1.851  | 2.999  | C | 11.688 | -1.280 | 2.765  |
| O                                     | 7.894  | 0.911  | 0.460  | H | 11.709 | -1.169 | 3.844  |
| H                                     | 8.259  | 0.446  | 1.276  | C | 13.120 | 1.810  | 0.021  |
| O                                     | 5.753  | 0.166  | 1.015  | H | 13.006 | 0.768  | -0.192 |
| O                                     | 7.650  | 2.736  | 2.838  | H | 13.938 | 1.948  | 0.697  |
| Fe                                    | 7.779  | 3.171  | 1.104  | N | 11.777 | 2.533  | 2.010  |
| Model <sup>5</sup> A6                 |        |        |        | H | 12.589 | 2.402  | 2.641  |
| E=-3130.576584 au ZPE=0.5635345707 au |        |        |        | C | 11.862 | 2.333  | 0.645  |
| C                                     | 8.842  | 6.265  | -3.327 | C | 10.521 | 2.887  | 2.331  |
| H                                     | 8.318  | 7.133  | -2.986 | H | 10.164 | 3.075  | 3.331  |
| H                                     | 8.592  | 6.077  | -4.350 | N | 9.773  | 2.948  | 1.224  |
| N                                     | 8.429  | 3.774  | -2.933 | C | 10.607 | 2.607  | 0.169  |
| H                                     | 8.733  | 3.468  | -3.868 | H | 10.250 | 2.580  | -0.844 |
| C                                     | 8.450  | 5.086  | -2.493 | C | 4.226  | 1.272  | -0.836 |
| C                                     | 8.080  | 2.982  | -1.898 | C | 2.985  | -0.123 | -2.369 |
| H                                     | 8.003  | 1.907  | -1.961 | H | 2.769  | -1.081 | -2.826 |
| N                                     | 7.870  | 3.715  | -0.802 | C | 3.943  | 0.008  | -1.391 |
| C                                     | 8.089  | 5.029  | -1.173 | H | 4.486  | -0.862 | -1.047 |
| H                                     | 7.989  | 5.840  | -0.472 | C | 2.263  | 1.005  | -2.790 |
| C                                     | 7.746  | 7.986  | 3.897  | O | 1.338  | 0.788  | -3.740 |
| H                                     | 8.483  | 7.623  | 4.583  | H | 0.889  | 1.615  | -3.982 |
|                                       |        |        |        | C | 3.501  | 2.398  | -1.266 |

|    |       |        |        |
|----|-------|--------|--------|
| H  | 3.690 | 3.363  | -0.810 |
| C  | 2.519 | 2.268  | -2.232 |
| H  | 1.937 | 3.131  | -2.539 |
| C  | 5.268 | 1.406  | 0.156  |
| O  | 5.713 | 2.466  | 0.620  |
| C  | 6.850 | 0.117  | 1.347  |
| H  | 7.051 | -0.894 | 1.688  |
| H  | 7.245 | 1.827  | 3.001  |
| O  | 7.920 | 0.859  | 0.943  |
| H  | 8.665 | 0.586  | 1.571  |
| O  | 5.762 | 0.194  | 0.536  |
| O  | 7.503 | 2.759  | 2.906  |
| Fe | 7.683 | 3.133  | 1.160  |

Model <sup>5</sup>TS6

E=-3130.552018 au ZPE=0.5622632074 au

|   |        |        |        |
|---|--------|--------|--------|
| C | 8.886  | 6.345  | -3.368 |
| H | 8.368  | 7.219  | -3.032 |
| H | 8.641  | 6.157  | -4.393 |
| N | 8.451  | 3.861  | -2.975 |
| H | 8.749  | 3.551  | -3.912 |
| C | 8.478  | 5.172  | -2.535 |
| C | 8.110  | 3.069  | -1.939 |
| H | 8.025  | 1.995  | -2.001 |
| N | 7.914  | 3.805  | -0.842 |
| C | 8.129  | 5.118  | -1.211 |
| H | 8.037  | 5.928  | -0.506 |
| C | 7.780  | 7.973  | 3.906  |
| H | 8.522  | 7.615  | 4.589  |
| H | 6.945  | 8.354  | 4.455  |
| N | 6.047  | 6.734  | 2.517  |
| H | 5.328  | 7.467  | 2.634  |
| C | 7.327  | 6.847  | 3.025  |
| C | 5.974  | 5.620  | 1.759  |
| H | 5.080  | 5.265  | 1.271  |
| N | 7.156  | 5.012  | 1.747  |
| C | 8.005  | 5.761  | 2.535  |
| H | 9.030  | 5.472  | 2.680  |
| C | 13.982 | -2.380 | -0.059 |
| H | 14.749 | -2.604 | 0.653  |
| H | 14.324 | -1.612 | -0.721 |
| C | 12.741 | -1.905 | 0.668  |
| C | 11.593 | -1.524 | -0.043 |
| H | 11.580 | -1.630 | -1.118 |

|    |        |        |        |
|----|--------|--------|--------|
| C  | 10.481 | -0.998 | 0.594  |
| H  | 9.610  | -0.701 | 0.019  |
| C  | 10.511 | -0.813 | 1.976  |
| O  | 9.410  | -0.190 | 2.556  |
| H  | 9.671  | 0.250  | 3.408  |
| C  | 12.713 | -1.773 | 2.059  |
| H  | 13.571 | -2.095 | 2.644  |
| C  | 11.610 | -1.228 | 2.721  |
| H  | 11.621 | -1.107 | 3.799  |
| C  | 13.124 | 1.817  | 0.023  |
| H  | 13.004 | 0.775  | -0.189 |
| H  | 13.944 | 1.952  | 0.697  |
| N  | 11.780 | 2.531  | 2.016  |
| H  | 12.588 | 2.386  | 2.649  |
| C  | 11.869 | 2.347  | 0.650  |
| C  | 10.526 | 2.898  | 2.335  |
| H  | 10.171 | 3.074  | 3.338  |
| N  | 9.784  | 2.982  | 1.226  |
| C  | 10.620 | 2.642  | 0.173  |
| H  | 10.269 | 2.633  | -0.843 |
| C  | 4.162  | 1.309  | -0.810 |
| C  | 3.055  | -0.241 | -2.294 |
| H  | 2.905  | -1.237 | -2.694 |
| C  | 3.953  | -0.004 | -1.275 |
| H  | 4.514  | -0.823 | -0.842 |
| C  | 2.311  | 0.822  | -2.830 |
| O  | 1.436  | 0.513  | -3.807 |
| H  | 0.972  | 1.313  | -4.104 |
| C  | 3.428  | 2.373  | -1.365 |
| H  | 3.569  | 3.377  | -0.982 |
| C  | 2.496  | 2.132  | -2.357 |
| H  | 1.903  | 2.947  | -2.758 |
| C  | 5.165  | 1.584  | 0.192  |
| O  | 5.656  | 2.695  | 0.429  |
| C  | 6.746  | 0.530  | 1.588  |
| H  | 6.910  | -0.385 | 2.152  |
| H  | 6.755  | 1.614  | 2.712  |
| O  | 7.816  | 0.966  | 0.859  |
| H  | 8.607  | 0.701  | 1.433  |
| O  | 5.587  | 0.470  | 0.858  |
| O  | 7.223  | 2.486  | 2.825  |
| Fe | 7.677  | 3.162  | 1.070  |

Model <sup>5</sup>A7

E=-3130.688276 au ZPE=0.5692427303 au

|   |        |        |        |
|---|--------|--------|--------|
| C | 8.939  | 6.468  | -3.504 |
| H | 8.440  | 7.339  | -3.133 |
| H | 8.718  | 6.346  | -4.544 |
| N | 8.435  | 3.985  | -3.263 |
| H | 8.765  | 3.710  | -4.201 |
| C | 8.470  | 5.267  | -2.751 |
| C | 8.033  | 3.146  | -2.288 |
| H | 7.925  | 2.080  | -2.426 |
| N | 7.796  | 3.818  | -1.164 |
| C | 8.057  | 5.145  | -1.450 |
| H | 7.945  | 5.919  | -0.706 |
| C | 7.837  | 7.932  | 3.931  |
| H | 8.601  | 7.576  | 4.590  |
| H | 7.029  | 8.335  | 4.506  |
| N | 6.024  | 6.685  | 2.661  |
| H | 5.326  | 7.436  | 2.788  |
| C | 7.335  | 6.798  | 3.090  |
| C | 5.901  | 5.556  | 1.935  |
| H | 4.981  | 5.205  | 1.493  |
| N | 7.075  | 4.930  | 1.864  |
| C | 7.972  | 5.699  | 2.580  |
| H | 9.006  | 5.411  | 2.659  |
| C | 13.666 | -2.170 | -0.030 |
| H | 14.477 | -2.316 | 0.653  |
| H | 13.926 | -1.408 | -0.734 |
| C | 12.426 | -1.747 | 0.739  |
| C | 11.246 | -1.346 | 0.092  |
| H | 11.200 | -1.380 | -0.990 |
| C | 10.146 | -0.871 | 0.802  |
| H | 9.250  | -0.545 | 0.282  |
| C | 10.218 | -0.774 | 2.190  |
| O | 9.132  | -0.237 | 2.886  |
| H | 9.470  | 0.239  | 3.691  |
| C | 12.443 | -1.686 | 2.138  |
| H | 13.330 | -2.016 | 2.672  |
| C | 11.355 | -1.208 | 2.868  |
| H | 11.401 | -1.147 | 3.950  |
| C | 13.103 | 1.821  | -0.058 |
| H | 13.008 | 0.782  | -0.297 |
| H | 13.906 | 1.955  | 0.637  |
| N | 11.726 | 2.489  | 1.918  |
| H | 12.528 | 2.351  | 2.560  |

|    |        |        |        |
|----|--------|--------|--------|
| C  | 11.826 | 2.312  | 0.554  |
| C  | 10.464 | 2.842  | 2.225  |
| H  | 10.112 | 3.016  | 3.229  |
| N  | 9.723  | 2.916  | 1.117  |
| C  | 10.571 | 2.585  | 0.070  |
| H  | 10.223 | 2.577  | -0.948 |
| C  | 4.112  | 1.383  | -0.912 |
| C  | 3.088  | -0.206 | -2.417 |
| H  | 2.926  | -1.217 | -2.772 |
| C  | 3.889  | 0.056  | -1.324 |
| H  | 4.365  | -0.756 | -0.789 |
| C  | 2.469  | 0.854  | -3.095 |
| O  | 1.702  | 0.526  | -4.157 |
| H  | 1.273  | 1.322  | -4.511 |
| C  | 3.495  | 2.440  | -1.601 |
| H  | 3.653  | 3.458  | -1.265 |
| C  | 2.669  | 2.179  | -2.681 |
| H  | 2.182  | 2.994  | -3.205 |
| C  | 5.016  | 1.679  | 0.190  |
| O  | 5.469  | 2.799  | 0.446  |
| C  | 6.140  | 0.741  | 2.091  |
| H  | 6.308  | -0.288 | 2.421  |
| H  | 4.556  | 1.258  | 3.050  |
| O  | 7.376  | 1.323  | 1.800  |
| H  | 8.127  | 0.757  | 2.170  |
| O  | 5.368  | 0.578  | 0.895  |
| O  | 5.489  | 1.525  | 3.013  |
| Fe | 7.614  | 3.198  | 0.844  |

Model <sup>5</sup>TS7

E=-3130.684981 au ZPE=0.5682478973 au

|   |       |       |        |
|---|-------|-------|--------|
| C | 8.931 | 6.458 | -3.498 |
| H | 8.432 | 7.329 | -3.129 |
| H | 8.712 | 6.335 | -4.538 |
| N | 8.427 | 3.975 | -3.255 |
| H | 8.763 | 3.699 | -4.191 |
| C | 8.459 | 5.257 | -2.745 |
| C | 8.012 | 3.138 | -2.283 |
| H | 7.905 | 2.072 | -2.420 |
| N | 7.763 | 3.812 | -1.162 |
| C | 8.031 | 5.138 | -1.448 |
| H | 7.914 | 5.913 | -0.706 |
| C | 7.835 | 7.932 | 3.934  |
| H | 8.598 | 7.573 | 4.593  |

|   |        |        |        |
|---|--------|--------|--------|
| H | 7.028  | 8.336  | 4.509  |
| N | 6.020  | 6.695  | 2.658  |
| H | 5.327  | 7.451  | 2.782  |
| C | 7.330  | 6.800  | 3.091  |
| C | 5.893  | 5.567  | 1.931  |
| H | 4.973  | 5.226  | 1.482  |
| N | 7.062  | 4.932  | 1.867  |
| C | 7.962  | 5.696  | 2.585  |
| H | 8.994  | 5.402  | 2.668  |
| C | 13.673 | -2.172 | -0.031 |
| H | 14.482 | -2.319 | 0.654  |
| H | 13.936 | -1.411 | -0.735 |
| C | 12.433 | -1.747 | 0.735  |
| C | 11.255 | -1.345 | 0.084  |
| H | 11.212 | -1.381 | -0.998 |
| C | 10.154 | -0.868 | 0.790  |
| H | 9.260  | -0.543 | 0.268  |
| C | 10.223 | -0.769 | 2.179  |
| O | 9.136  | -0.227 | 2.867  |
| H | 9.470  | 0.246  | 3.675  |
| C | 12.446 | -1.685 | 2.134  |
| H | 13.331 | -2.015 | 2.672  |
| C | 11.356 | -1.203 | 2.860  |
| H | 11.400 | -1.142 | 3.942  |
| C | 13.096 | 1.823  | -0.057 |
| H | 12.998 | 0.784  | -0.295 |
| H | 13.898 | 1.955  | 0.639  |
| N | 11.719 | 2.496  | 1.916  |
| H | 12.518 | 2.354  | 2.559  |
| C | 11.820 | 2.319  | 0.551  |
| C | 10.458 | 2.854  | 2.221  |
| H | 10.105 | 3.026  | 3.225  |
| N | 9.717  | 2.931  | 1.112  |
| C | 10.566 | 2.598  | 0.067  |
| H | 10.219 | 2.591  | -0.952 |
| C | 4.118  | 1.364  | -0.882 |
| C | 3.109  | -0.211 | -2.412 |
| H | 2.948  | -1.218 | -2.777 |
| C | 3.904  | 0.041  | -1.312 |
| H | 4.378  | -0.777 | -0.783 |
| C | 2.489  | 0.855  | -3.081 |
| O | 1.725  | 0.538  | -4.147 |
| H | 1.294  | 1.336  | -4.494 |
| C | 3.501  | 2.427  | -1.562 |

|    |       |        |        |
|----|-------|--------|--------|
| H  | 3.647 | 3.441  | -1.210 |
| C  | 2.684 | 2.177  | -2.651 |
| H  | 2.195 | 2.996  | -3.168 |
| C  | 4.983 | 1.653  | 0.249  |
| O  | 5.393 | 2.778  | 0.563  |
| C  | 6.146 | 0.713  | 2.113  |
| H  | 6.376 | -0.300 | 2.444  |
| H  | 4.700 | 1.826  | 2.781  |
| O  | 7.373 | 1.316  | 1.742  |
| H  | 8.135 | 0.773  | 2.117  |
| O  | 5.336 | 0.549  | 0.952  |
| O  | 5.514 | 1.416  | 3.108  |
| Fe | 7.604 | 3.198  | 0.848  |

Model <sup>5</sup>A8

E=-3130.687680 au ZPE=0.5682400269 au

|   |        |        |        |
|---|--------|--------|--------|
| C | 8.915  | 6.443  | -3.503 |
| H | 8.417  | 7.316  | -3.136 |
| H | 8.699  | 6.320  | -4.544 |
| N | 8.414  | 3.959  | -3.257 |
| H | 8.756  | 3.682  | -4.190 |
| C | 8.438  | 5.244  | -2.751 |
| C | 7.992  | 3.124  | -2.287 |
| H | 7.888  | 2.058  | -2.421 |
| N | 7.731  | 3.803  | -1.170 |
| C | 7.999  | 5.129  | -1.459 |
| H | 7.872  | 5.907  | -0.722 |
| C | 7.829  | 7.925  | 3.943  |
| H | 8.592  | 7.567  | 4.602  |
| H | 7.021  | 8.327  | 4.518  |
| N | 6.025  | 6.695  | 2.643  |
| H | 5.332  | 7.454  | 2.759  |
| C | 7.327  | 6.793  | 3.099  |
| C | 5.902  | 5.567  | 1.918  |
| H | 4.987  | 5.231  | 1.453  |
| N | 7.069  | 4.921  | 1.876  |
| C | 7.961  | 5.683  | 2.607  |
| H | 8.990  | 5.385  | 2.705  |
| C | 13.705 | -2.188 | -0.037 |
| H | 14.516 | -2.343 | 0.644  |
| H | 13.970 | -1.426 | -0.740 |
| C | 12.471 | -1.757 | 0.735  |
| C | 11.292 | -1.353 | 0.088  |
| H | 11.242 | -1.395 | -0.994 |

|    |        |        |        |
|----|--------|--------|--------|
| C  | 10.197 | -0.869 | 0.798  |
| H  | 9.300  | -0.543 | 0.280  |
| C  | 10.275 | -0.764 | 2.185  |
| O  | 9.195  | -0.212 | 2.877  |
| H  | 9.534  | 0.270  | 3.678  |
| C  | 12.493 | -1.691 | 2.133  |
| H  | 13.377 | -2.026 | 2.667  |
| C  | 11.409 | -1.201 | 2.863  |
| H  | 11.459 | -1.134 | 3.945  |
| C  | 13.113 | 1.823  | -0.075 |
| H  | 13.010 | 0.784  | -0.309 |
| H  | 13.916 | 1.955  | 0.619  |
| N  | 11.743 | 2.514  | 1.896  |
| H  | 12.541 | 2.371  | 2.541  |
| C  | 11.840 | 2.326  | 0.533  |
| C  | 10.485 | 2.884  | 2.200  |
| H  | 10.135 | 3.062  | 3.204  |
| N  | 9.745  | 2.959  | 1.091  |
| C  | 10.588 | 2.611  | 0.048  |
| H  | 10.237 | 2.599  | -0.970 |
| C  | 4.146  | 1.381  | -0.764 |
| C  | 3.174  | -0.164 | -2.347 |
| H  | 3.032  | -1.164 | -2.742 |
| C  | 3.963  | 0.068  | -1.239 |
| H  | 4.455  | -0.756 | -0.736 |
| C  | 2.528  | 0.909  | -2.981 |
| O  | 1.767  | 0.610  | -4.053 |
| H  | 1.321  | 1.409  | -4.378 |
| C  | 3.505  | 2.452  | -1.410 |
| H  | 3.622  | 3.456  | -1.021 |
| C  | 2.695  | 2.221  | -2.508 |
| H  | 2.186  | 3.045  | -2.995 |
| C  | 4.993  | 1.648  | 0.383  |
| O  | 5.379  | 2.778  | 0.740  |
| C  | 6.245  | 0.745  | 2.179  |
| H  | 6.444  | -0.252 | 2.564  |
| H  | 5.370  | 2.329  | 2.780  |
| O  | 7.462  | 1.289  | 1.692  |
| H  | 8.230  | 0.779  | 2.106  |
| O  | 5.384  | 0.547  | 1.049  |
| O  | 5.673  | 1.491  | 3.169  |
| Fe | 7.638  | 3.201  | 0.838  |

Model <sup>5</sup>TS8  
E=-3130.655693 au ZPE=0.5638701460 au

|   |        |        |        |
|---|--------|--------|--------|
| C | 8.895  | 6.405  | -3.483 |
| H | 8.392  | 7.276  | -3.117 |
| H | 8.679  | 6.279  | -4.523 |
| N | 8.411  | 3.915  | -3.224 |
| H | 8.752  | 3.638  | -4.158 |
| C | 8.426  | 5.204  | -2.727 |
| C | 7.989  | 3.083  | -2.252 |
| H | 7.888  | 2.016  | -2.381 |
| N | 7.717  | 3.767  | -1.139 |
| C | 7.979  | 5.095  | -1.437 |
| H | 7.841  | 5.877  | -0.706 |
| C | 7.820  | 7.940  | 3.946  |
| H | 8.578  | 7.582  | 4.611  |
| H | 7.007  | 8.340  | 4.515  |
| N | 6.028  | 6.709  | 2.632  |
| H | 5.329  | 7.461  | 2.754  |
| C | 7.327  | 6.810  | 3.096  |
| C | 5.915  | 5.590  | 1.892  |
| H | 5.002  | 5.252  | 1.425  |
| N | 7.087  | 4.954  | 1.848  |
| C | 7.970  | 5.711  | 2.594  |
| H | 9.001  | 5.420  | 2.696  |
| C | 13.717 | -2.195 | -0.048 |
| H | 14.527 | -2.350 | 0.633  |
| H | 13.983 | -1.434 | -0.752 |
| C | 12.483 | -1.762 | 0.723  |
| C | 11.303 | -1.363 | 0.075  |
| H | 11.252 | -1.408 | -1.006 |
| C | 10.204 | -0.885 | 0.786  |
| H | 9.303  | -0.570 | 0.267  |
| C | 10.284 | -0.780 | 2.172  |
| O | 9.203  | -0.236 | 2.871  |
| H | 9.549  | 0.243  | 3.670  |
| C | 12.506 | -1.694 | 2.121  |
| H | 13.393 | -2.025 | 2.655  |
| C | 11.421 | -1.209 | 2.850  |
| H | 11.469 | -1.141 | 3.932  |
| C | 13.161 | 1.814  | -0.092 |
| H | 13.059 | 0.775  | -0.328 |
| H | 13.969 | 1.945  | 0.597  |
| N | 11.803 | 2.506  | 1.889  |
| H | 12.607 | 2.368  | 2.530  |



|    |        |        |        |   |        |        |        |
|----|--------|--------|--------|---|--------|--------|--------|
| C  | 11.891 | 2.313  | 0.526  | H | 7.089  | 8.249  | 4.504  |
| C  | 10.551 | 2.880  | 2.202  | N | 6.094  | 6.660  | 2.597  |
| H  | 10.206 | 3.063  | 3.207  | H | 5.402  | 7.416  | 2.731  |
| N  | 9.805  | 2.952  | 1.096  | C | 7.395  | 6.741  | 3.058  |
| C  | 10.637 | 2.599  | 0.046  | C | 5.971  | 5.549  | 1.844  |
| H  | 10.277 | 2.585  | -0.968 | H | 5.054  | 5.240  | 1.365  |
| C  | 4.174  | 1.351  | -0.745 | N | 7.133  | 4.898  | 1.790  |
| C  | 3.245  | -0.168 | -2.381 | C | 8.025  | 5.639  | 2.541  |
| H  | 3.122  | -1.160 | -2.802 | H | 9.053  | 5.335  | 2.634  |
| C  | 4.040  | 0.054  | -1.275 | C | 13.580 | -2.141 | -0.027 |
| H  | 4.559  | -0.766 | -0.791 | H | 14.407 | -2.264 | 0.641  |
| C  | 2.559  | 0.906  | -2.973 | H | 13.811 | -1.381 | -0.744 |
| O  | 1.797  | 0.620  | -4.050 | C | 12.347 | -1.735 | 0.763  |
| H  | 1.330  | 1.418  | -4.347 | C | 11.142 | -1.360 | 0.146  |
| C  | 3.486  | 2.421  | -1.343 | H | 11.063 | -1.411 | -0.933 |
| H  | 3.553  | 3.412  | -0.910 | C | 10.053 | -0.888 | 0.882  |
| C  | 2.686  | 2.203  | -2.453 | H | 9.138  | -0.585 | 0.382  |
| H  | 2.142  | 3.027  | -2.904 | C | 10.171 | -0.771 | 2.265  |
| C  | 4.963  | 1.553  | 0.459  | O | 9.111  | -0.226 | 3.006  |
| O  | 5.154  | 2.783  | 0.899  | H | 9.496  | 0.256  | 3.787  |
| C  | 6.307  | 1.103  | 2.614  | C | 12.402 | -1.660 | 2.161  |
| H  | 6.373  | 0.109  | 3.050  | H | 13.305 | -1.975 | 2.675  |
| H  | 5.284  | 2.635  | 2.028  | C | 11.330 | -1.186 | 2.915  |
| O  | 7.513  | 1.501  | 2.056  | H | 11.406 | -1.112 | 3.995  |
| H  | 8.232  | 0.799  | 2.220  | C | 13.108 | 1.795  | -0.091 |
| O  | 5.475  | 0.569  | 1.079  | H | 13.043 | 0.757  | -0.342 |
| O  | 5.563  | 1.995  | 3.100  | H | 13.895 | 1.941  | 0.619  |
| Fe | 7.734  | 3.240  | 0.884  | N | 11.695 | 2.467  | 1.860  |

Model <sup>5</sup>P

E=-3130.686529 au ZPE=0.5670300877 au

|   |       |       |        |   |        |        |        |
|---|-------|-------|--------|---|--------|--------|--------|
| C | 8.975 | 6.549 | -3.552 | C | 11.809 | 2.248  | 0.502  |
| H | 8.494 | 7.430 | -3.182 | C | 10.418 | 2.776  | 2.148  |
| H | 8.760 | 6.436 | -4.594 | H | 10.054 | 2.976  | 3.143  |
| N | 8.421 | 4.080 | -3.326 | N | 9.681  | 2.780  | 1.033  |
| H | 8.756 | 3.798 | -4.261 | C | 10.547 | 2.452  | 0.003  |
| C | 8.472 | 5.358 | -2.809 | H | 10.201 | 2.389  | -1.015 |
| C | 7.991 | 3.244 | -2.363 | C | 4.276  | 1.381  | -1.182 |
| H | 7.856 | 2.182 | -2.497 | C | 3.025  | -0.203 | -2.510 |
| N | 7.748 | 3.918 | -1.240 | H | 2.915  | -1.165 | -2.997 |
| C | 8.039 | 5.240 | -1.514 | C | 4.175  | 0.134  | -1.826 |
| H | 7.931 | 6.013 | -0.769 | H | 5.011  | -0.549 | -1.753 |
| C | 7.895 | 7.863 | 3.916  | C | 1.968  | 0.720  | -2.586 |
| H | 8.666 | 7.501 | 4.563  | O | 0.876  | 0.344  | -3.284 |
|   |       |       |        | H | 0.290  | 1.109  | -3.396 |
|   |       |       |        | C | 3.206  | 2.292  | -1.249 |

|    |       |       |        |
|----|-------|-------|--------|
| H  | 3.279 | 3.251 | -0.753 |
| C  | 2.060 | 1.968 | -1.953 |
| H  | 1.228 | 2.664 | -1.993 |
| C  | 5.506 | 1.710 | -0.492 |
| O  | 5.451 | 2.772 | 0.409  |
| C  | 6.289 | 1.259 | 3.043  |
| H  | 6.497 | 0.575 | 3.877  |
| H  | 4.987 | 2.502 | 1.244  |
| O  | 7.339 | 1.450 | 2.241  |
| H  | 8.103 | 0.797 | 2.460  |
| O  | 6.602 | 1.188 | -0.658 |
| O  | 5.214 | 1.798 | 2.885  |
| Fe | 7.626 | 3.146 | 0.720  |

Mode <sup>3</sup>A1

E=-3130.511071 au ZPE=0.5613524034 au

|   |        |        |        |
|---|--------|--------|--------|
| C | 8.904  | 6.391  | -3.424 |
| H | 8.393  | 7.258  | -3.060 |
| H | 8.656  | 6.237  | -4.453 |
| N | 8.492  | 3.897  | -3.092 |
| H | 8.803  | 3.605  | -4.031 |
| C | 8.489  | 5.196  | -2.627 |
| C | 8.164  | 3.078  | -2.070 |
| H | 8.124  | 2.003  | -2.155 |
| N | 7.939  | 3.784  | -0.964 |
| C | 8.125  | 5.107  | -1.308 |
| H | 8.013  | 5.904  | -0.591 |
| C | 7.894  | 7.898  | 3.875  |
| H | 8.649  | 7.548  | 4.548  |
| H | 7.051  | 8.246  | 4.435  |
| N | 6.182  | 6.642  | 2.482  |
| H | 5.452  | 7.360  | 2.619  |
| C | 7.468  | 6.776  | 2.974  |
| C | 6.121  | 5.538  | 1.713  |
| H | 5.229  | 5.166  | 1.235  |
| N | 7.319  | 4.953  | 1.678  |
| C | 8.163  | 5.715  | 2.460  |
| H | 9.198  | 5.449  | 2.577  |
| C | 13.816 | -2.256 | 0.008  |
| H | 14.556 | -2.457 | 0.754  |
| H | 14.172 | -1.492 | -0.651 |
| C | 12.537 | -1.791 | 0.677  |
| C | 11.444 | -1.361 | -0.090 |
| H | 11.513 | -1.398 | -1.167 |

|    |        |        |        |
|----|--------|--------|--------|
| C  | 10.287 | -0.867 | 0.493  |
| H  | 9.470  | -0.520 | -0.130 |
| C  | 10.206 | -0.771 | 1.882  |
| O  | 9.051  | -0.208 | 2.421  |
| H  | 9.259  | 0.215  | 3.295  |
| C  | 12.409 | -1.728 | 2.068  |
| H  | 13.226 | -2.073 | 2.695  |
| C  | 11.256 | -1.224 | 2.678  |
| H  | 11.193 | -1.166 | 3.760  |
| C  | 13.050 | 1.892  | 0.052  |
| H  | 12.919 | 0.848  | -0.145 |
| H  | 13.869 | 2.027  | 0.727  |
| N  | 11.680 | 2.558  | 2.039  |
| H  | 12.468 | 2.356  | 2.681  |
| C  | 11.799 | 2.446  | 0.667  |
| C  | 10.430 | 2.936  | 2.352  |
| H  | 10.056 | 3.065  | 3.355  |
| N  | 9.717  | 3.099  | 1.231  |
| C  | 10.572 | 2.802  | 0.177  |
| H  | 10.249 | 2.859  | -0.844 |
| C  | 4.362  | 1.440  | -0.731 |
| C  | 3.048  | -0.079 | -2.094 |
| H  | 2.867  | -1.058 | -2.521 |
| C  | 4.113  | 0.149  | -1.251 |
| H  | 4.752  | -0.688 | -0.995 |
| C  | 2.174  | 0.975  | -2.414 |
| O  | 1.150  | 0.678  | -3.229 |
| H  | 0.646  | 1.480  | -3.447 |
| C  | 3.473  | 2.486  | -1.064 |
| H  | 3.632  | 3.470  | -0.642 |
| C  | 2.390  | 2.261  | -1.888 |
| H  | 1.694  | 3.065  | -2.107 |
| C  | 5.528  | 1.713  | 0.069  |
| O  | 5.819  | 2.871  | 0.464  |
| C  | 6.495  | 0.605  | 0.443  |
| H  | 6.565  | -0.173 | -0.319 |
| H  | 6.156  | 0.162  | 1.387  |
| O  | 7.792  | 1.197  | 0.610  |
| H  | 8.293  | 0.709  | 1.344  |
| O  | 7.620  | 2.662  | 2.841  |
| O  | 6.548  | 1.975  | 3.086  |
| Fe | 7.731  | 3.148  | 0.995  |

Model <sup>3</sup>TS1

E=-3130.469935 au ZPE=0.5558587378 au

|   |        |        |        |
|---|--------|--------|--------|
| C | 8.929  | 6.417  | -3.406 |
| H | 8.424  | 7.289  | -3.047 |
| H | 8.673  | 6.254  | -4.432 |
| N | 8.442  | 3.936  | -3.068 |
| H | 8.730  | 3.635  | -4.011 |
| C | 8.515  | 5.231  | -2.595 |
| C | 8.103  | 3.127  | -2.043 |
| H | 7.999  | 2.057  | -2.130 |
| N | 7.957  | 3.837  | -0.924 |
| C | 8.200  | 5.151  | -1.265 |
| H | 8.151  | 5.945  | -0.539 |
| C | 7.945  | 7.918  | 3.868  |
| H | 8.703  | 7.565  | 4.536  |
| H | 7.104  | 8.263  | 4.433  |
| N | 6.219  | 6.660  | 2.500  |
| H | 5.490  | 7.377  | 2.650  |
| C | 7.515  | 6.801  | 2.963  |
| C | 6.145  | 5.557  | 1.733  |
| H | 5.248  | 5.182  | 1.268  |
| N | 7.348  | 4.980  | 1.667  |
| C | 8.207  | 5.746  | 2.428  |
| H | 9.245  | 5.483  | 2.522  |
| C | 13.799 | -2.249 | -0.002 |
| H | 14.530 | -2.447 | 0.754  |
| H | 14.163 | -1.487 | -0.659 |
| C | 12.512 | -1.782 | 0.649  |
| C | 11.439 | -1.336 | -0.135 |
| H | 11.531 | -1.360 | -1.211 |
| C | 10.274 | -0.838 | 0.429  |
| H | 9.469  | -0.482 | -0.206 |
| C | 10.169 | -0.759 | 1.815  |
| O | 9.005  | -0.189 | 2.337  |
| H | 9.197  | 0.225  | 3.220  |
| C | 12.358 | -1.733 | 2.038  |
| H | 13.161 | -2.090 | 2.677  |
| C | 11.197 | -1.227 | 2.630  |
| H | 11.112 | -1.179 | 3.711  |
| C | 13.010 | 1.899  | 0.079  |
| H | 12.877 | 0.855  | -0.115 |
| H | 13.828 | 2.035  | 0.755  |
| N | 11.633 | 2.556  | 2.062  |
| H | 12.418 | 2.347  | 2.703  |

|    |        |        |        |
|----|--------|--------|--------|
| C  | 11.759 | 2.457  | 0.690  |
| C  | 10.378 | 2.936  | 2.369  |
| H  | 10.003 | 3.064  | 3.372  |
| N  | 9.673  | 3.112  | 1.248  |
| C  | 10.534 | 2.818  | 0.197  |
| H  | 10.220 | 2.884  | -0.826 |
| C  | 4.311  | 1.414  | -0.670 |
| C  | 3.120  | -0.164 | -2.074 |
| H  | 2.999  | -1.150 | -2.507 |
| C  | 4.142  | 0.113  | -1.190 |
| H  | 4.833  | -0.679 | -0.924 |
| C  | 2.215  | 0.850  | -2.433 |
| O  | 1.236  | 0.516  | -3.293 |
| H  | 0.715  | 1.301  | -3.528 |
| C  | 3.398  | 2.423  | -1.045 |
| H  | 3.504  | 3.417  | -0.629 |
| C  | 2.353  | 2.145  | -1.903 |
| H  | 1.631  | 2.917  | -2.152 |
| C  | 5.462  | 1.752  | 0.131  |
| O  | 5.782  | 2.962  | 0.365  |
| C  | 6.357  | 0.764  | 0.732  |
| H  | 6.238  | -0.310 | 0.622  |
| H  | 6.092  | 1.208  | 2.068  |
| O  | 7.686  | 1.209  | 0.631  |
| H  | 8.270  | 0.702  | 1.312  |
| O  | 7.430  | 2.570  | 2.739  |
| O  | 6.244  | 1.930  | 2.961  |
| Fe | 7.667  | 3.176  | 0.983  |

Model <sup>3</sup>A2

E=-3130.481900 au ZPE=0.5555867853 au

|   |       |       |        |
|---|-------|-------|--------|
| C | 8.879 | 6.365 | -3.406 |
| H | 8.363 | 7.231 | -3.048 |
| H | 8.643 | 6.210 | -4.438 |
| N | 8.444 | 3.871 | -3.083 |
| H | 8.763 | 3.582 | -4.022 |
| C | 8.455 | 5.168 | -2.612 |
| C | 8.087 | 3.053 | -2.068 |
| H | 8.009 | 1.982 | -2.179 |
| N | 7.861 | 3.749 | -0.951 |
| C | 8.074 | 5.073 | -1.297 |
| H | 7.958 | 5.870 | -0.582 |
| C | 7.790 | 8.057 | 3.906  |
| H | 8.528 | 7.680 | 4.582  |

|   |        |        |        |
|---|--------|--------|--------|
| H | 6.964  | 8.449  | 4.462  |
| N | 6.027  | 6.855  | 2.521  |
| H | 5.313  | 7.593  | 2.660  |
| C | 7.312  | 6.946  | 3.016  |
| C | 5.942  | 5.762  | 1.733  |
| H | 5.038  | 5.447  | 1.236  |
| N | 7.117  | 5.136  | 1.688  |
| C | 7.975  | 5.869  | 2.486  |
| H | 9.002  | 5.577  | 2.613  |
| C | 13.807 | -2.264 | -0.011 |
| H | 14.563 | -2.449 | 0.723  |
| H | 14.133 | -1.488 | -0.672 |
| C | 12.527 | -1.835 | 0.679  |
| C | 11.410 | -1.432 | -0.067 |
| H | 11.467 | -1.440 | -1.146 |
| C | 10.236 | -1.010 | 0.542  |
| H | 9.395  | -0.691 | -0.063 |
| C | 10.169 | -0.966 | 1.932  |
| O | 8.976  | -0.517 | 2.513  |
| H | 9.178  | -0.054 | 3.371  |
| C | 12.419 | -1.800 | 2.073  |
| H | 13.262 | -2.119 | 2.681  |
| C | 11.251 | -1.371 | 2.708  |
| H | 11.197 | -1.338 | 3.792  |
| C | 13.052 | 1.798  | 0.045  |
| H | 12.948 | 0.758  | -0.182 |
| H | 13.873 | 1.936  | 0.717  |
| N | 11.706 | 2.421  | 2.060  |
| H | 12.520 | 2.252  | 2.682  |
| C | 11.789 | 2.300  | 0.687  |
| C | 10.456 | 2.784  | 2.402  |
| H | 10.125 | 2.950  | 3.415  |
| N | 9.698  | 2.923  | 1.306  |
| C | 10.535 | 2.621  | 0.231  |
| H | 10.186 | 2.662  | -0.785 |
| C | 4.331  | 1.168  | -0.747 |
| C | 3.103  | -0.297 | -2.246 |
| H | 2.956  | -1.257 | -2.728 |
| C | 4.132  | -0.095 | -1.352 |
| H | 4.792  | -0.923 | -1.124 |
| C | 2.221  | 0.756  | -2.546 |
| O | 1.234  | 0.486  | -3.418 |
| H | 0.730  | 1.293  | -3.618 |
| C | 3.437  | 2.215  | -1.064 |

|    |       |        |        |
|----|-------|--------|--------|
| H  | 3.569 | 3.180  | -0.592 |
| C  | 2.390 | 2.015  | -1.943 |
| H  | 1.691 | 2.818  | -2.154 |
| C  | 5.469 | 1.429  | 0.112  |
| O  | 5.704 | 2.619  | 0.565  |
| C  | 6.407 | 0.408  | 0.445  |
| H  | 6.231 | -0.661 | 0.372  |
| H  | 5.368 | 2.721  | 2.448  |
| O  | 7.582 | 0.839  | 0.892  |
| H  | 8.107 | 0.233  | 1.549  |
| O  | 7.220 | 2.690  | 2.889  |
| O  | 5.867 | 2.689  | 3.303  |
| Fe | 7.579 | 3.149  | 1.150  |

Model <sup>3</sup>TS2

E=-3130.459014 au ZPE=0.5615801553 au

|   |        |        |        |
|---|--------|--------|--------|
| C | 8.930  | 6.455  | -3.445 |
| H | 8.423  | 7.330  | -3.095 |
| H | 8.683  | 6.287  | -4.472 |
| N | 8.481  | 3.973  | -3.090 |
| H | 8.769  | 3.671  | -4.034 |
| C | 8.507  | 5.276  | -2.632 |
| C | 8.180  | 3.162  | -2.060 |
| H | 8.099  | 2.089  | -2.133 |
| N | 8.006  | 3.884  | -0.953 |
| C | 8.187  | 5.204  | -1.302 |
| H | 8.105  | 6.001  | -0.582 |
| C | 7.894  | 7.862  | 3.876  |
| H | 8.655  | 7.499  | 4.534  |
| H | 7.061  | 8.209  | 4.451  |
| N | 6.160  | 6.654  | 2.475  |
| H | 5.447  | 7.389  | 2.614  |
| C | 7.448  | 6.754  | 2.967  |
| C | 6.070  | 5.559  | 1.698  |
| H | 5.177  | 5.224  | 1.196  |
| N | 7.250  | 4.941  | 1.658  |
| C | 8.118  | 5.680  | 2.440  |
| H | 9.149  | 5.394  | 2.549  |
| C | 13.816 | -2.280 | 0.008  |
| H | 14.537 | -2.483 | 0.772  |
| H | 14.189 | -1.514 | -0.639 |
| C | 12.520 | -1.817 | 0.645  |
| C | 11.447 | -1.403 | -0.156 |
| H | 11.546 | -1.455 | -1.230 |

|    |        |        |        |
|----|--------|--------|--------|
| C  | 10.271 | -0.908 | 0.385  |
| H  | 9.464  | -0.586 | -0.264 |
| C  | 10.155 | -0.792 | 1.769  |
| O  | 8.988  | -0.210 | 2.258  |
| H  | 9.160  | 0.194  | 3.147  |
| C  | 12.354 | -1.740 | 2.031  |
| H  | 13.155 | -2.075 | 2.684  |
| C  | 11.182 | -1.232 | 2.601  |
| H  | 11.090 | -1.163 | 3.680  |
| C  | 12.976 | 1.854  | 0.105  |
| H  | 12.864 | 0.809  | -0.094 |
| H  | 13.786 | 2.002  | 0.789  |
| N  | 11.573 | 2.527  | 2.074  |
| H  | 12.357 | 2.347  | 2.726  |
| C  | 11.710 | 2.387  | 0.707  |
| C  | 10.308 | 2.892  | 2.362  |
| H  | 9.933  | 3.050  | 3.362  |
| N  | 9.605  | 3.013  | 1.230  |
| C  | 10.480 | 2.698  | 0.197  |
| H  | 10.174 | 2.717  | -0.830 |
| C  | 4.304  | 1.438  | -0.642 |
| C  | 3.155  | -0.215 | -2.004 |
| H  | 3.071  | -1.216 | -2.409 |
| C  | 4.164  | 0.114  | -1.117 |
| H  | 4.880  | -0.649 | -0.825 |
| C  | 2.233  | 0.763  | -2.413 |
| O  | 1.268  | 0.384  | -3.282 |
| H  | 0.746  | 1.159  | -3.545 |
| C  | 3.370  | 2.408  | -1.070 |
| H  | 3.450  | 3.421  | -0.695 |
| C  | 2.338  | 2.075  | -1.926 |
| H  | 1.605  | 2.823  | -2.208 |
| C  | 5.435  | 1.851  | 0.143  |
| O  | 5.776  | 3.129  | 0.209  |
| C  | 6.363  | 1.000  | 0.840  |
| H  | 6.111  | 0.003  | 1.187  |
| H  | 5.004  | 2.651  | 2.356  |
| O  | 7.684  | 1.167  | 0.411  |
| H  | 8.277  | 0.698  | 1.093  |
| O  | 6.797  | 2.025  | 2.243  |
| O  | 5.723  | 2.564  | 3.014  |
| Fe | 7.608  | 3.187  | 0.851  |

Model <sup>3</sup>A3

E=-3130.530913 au ZPE=0.5669586703 au

|   |        |        |        |
|---|--------|--------|--------|
| C | 8.964  | 6.506  | -3.547 |
| H | 8.461  | 7.370  | -3.165 |
| H | 8.738  | 6.393  | -4.587 |
| N | 8.473  | 4.020  | -3.327 |
| H | 8.786  | 3.754  | -4.273 |
| C | 8.508  | 5.295  | -2.804 |
| C | 8.127  | 3.164  | -2.343 |
| H | 8.044  | 2.097  | -2.483 |
| N | 7.926  | 3.822  | -1.207 |
| C | 8.145  | 5.154  | -1.490 |
| H | 8.051  | 5.919  | -0.734 |
| C | 7.972  | 7.948  | 3.958  |
| H | 8.746  | 7.609  | 4.615  |
| H | 7.156  | 8.329  | 4.535  |
| N | 6.199  | 6.687  | 2.657  |
| H | 5.491  | 7.431  | 2.776  |
| C | 7.497  | 6.806  | 3.116  |
| C | 6.106  | 5.566  | 1.915  |
| H | 5.206  | 5.233  | 1.423  |
| N | 7.286  | 4.944  | 1.873  |
| C | 8.157  | 5.717  | 2.612  |
| H | 9.194  | 5.448  | 2.698  |
| C | 13.677 | -2.166 | -0.013 |
| H | 14.452 | -2.329 | 0.706  |
| H | 13.984 | -1.408 | -0.703 |
| C | 12.412 | -1.720 | 0.699  |
| C | 11.280 | -1.296 | -0.014 |
| H | 11.296 | -1.329 | -1.095 |
| C | 10.150 | -0.801 | 0.629  |
| H | 9.296  | -0.458 | 0.055  |
| C | 10.141 | -0.707 | 2.020  |
| O | 9.020  | -0.150 | 2.642  |
| H | 9.309  | 0.340  | 3.456  |
| C | 12.351 | -1.657 | 2.096  |
| H | 13.200 | -1.998 | 2.681  |
| C | 11.229 | -1.159 | 2.762  |
| H | 11.217 | -1.100 | 3.846  |
| C | 13.059 | 1.884  | -0.040 |
| H | 12.931 | 0.843  | -0.253 |
| H | 13.862 | 2.009  | 0.656  |
| N | 11.667 | 2.581  | 1.916  |
| H | 12.443 | 2.390  | 2.574  |

|    |        |        |        |   |        |        |        |
|----|--------|--------|--------|---|--------|--------|--------|
| C  | 11.796 | 2.432  | 0.551  | N | 6.175  | 6.668  | 2.664  |
| C  | 10.413 | 2.983  | 2.200  | H | 5.468  | 7.414  | 2.779  |
| H  | 10.037 | 3.141  | 3.197  | C | 7.477  | 6.795  | 3.110  |
| N  | 9.712  | 3.120  | 1.071  | C | 6.075  | 5.535  | 1.941  |
| C  | 10.573 | 2.781  | 0.038  | H | 5.173  | 5.195  | 1.457  |
| H  | 10.252 | 2.814  | -0.986 | N | 7.257  | 4.913  | 1.899  |
| C  | 4.337  | 1.492  | -0.606 | C | 8.133  | 5.697  | 2.619  |
| C  | 3.271  | -0.199 | -1.977 | H | 9.171  | 5.432  | 2.700  |
| H  | 3.146  | -1.225 | -2.300 | C | 13.684 | -2.168 | -0.014 |
| C  | 4.144  | 0.137  | -0.961 | H | 14.462 | -2.331 | 0.702  |
| H  | 4.710  | -0.651 | -0.475 | H | 13.989 | -1.411 | -0.706 |
| C  | 2.512  | 0.800  | -2.612 | C | 12.422 | -1.721 | 0.702  |
| O  | 1.658  | 0.406  | -3.574 | C | 11.290 | -1.290 | -0.008 |
| H  | 1.181  | 1.173  | -3.932 | H | 11.304 | -1.319 | -1.090 |
| C  | 3.583  | 2.486  | -1.274 | C | 10.164 | -0.792 | 0.639  |
| H  | 3.707  | 3.522  | -0.988 | H | 9.311  | -0.441 | 0.067  |
| C  | 2.666  | 2.149  | -2.245 | C | 10.157 | -0.702 | 2.030  |
| H  | 2.066  | 2.917  | -2.720 | O | 9.040  | -0.139 | 2.651  |
| C  | 5.352  | 1.914  | 0.319  | H | 9.328  | 0.343  | 3.469  |
| O  | 5.770  | 3.097  | 0.341  | C | 12.363 | -1.663 | 2.099  |
| C  | 6.086  | 1.004  | 1.324  | H | 13.212 | -2.011 | 2.681  |
| H  | 5.797  | -0.051 | 1.311  | C | 11.244 | -1.163 | 2.769  |
| H  | 4.379  | 2.644  | 2.735  | H | 11.233 | -1.108 | 3.853  |
| O  | 7.451  | 1.190  | 1.061  | C | 13.066 | 1.887  | -0.043 |
| H  | 8.043  | 0.667  | 1.703  | H | 12.932 | 0.847  | -0.258 |
| O  | 5.915  | 1.549  | 2.635  | H | 13.870 | 2.007  | 0.652  |
| O  | 4.494  | 1.688  | 2.871  | N | 11.676 | 2.582  | 1.915  |
| Fe | 7.744  | 3.276  | 0.791  | H | 12.453 | 2.387  | 2.573  |

Model <sup>3</sup>TS3' ZPE=0.5666156908 au

|   |       |       |        |   |        |        |        |
|---|-------|-------|--------|---|--------|--------|--------|
| C | 8.971 | 6.519 | -3.553 | C | 11.806 | 2.441  | 0.550  |
| H | 8.470 | 7.385 | -3.173 | C | 10.424 | 2.989  | 2.200  |
| H | 8.744 | 6.403 | -4.592 | H | 10.049 | 3.141  | 3.199  |
| N | 8.472 | 4.036 | -3.326 | N | 9.724  | 3.137  | 1.072  |
| H | 8.780 | 3.765 | -4.273 | C | 10.585 | 2.799  | 0.038  |
| C | 8.513 | 5.312 | -2.806 | H | 10.265 | 2.840  | -0.986 |
| C | 8.131 | 3.183 | -2.337 | C | 4.331  | 1.465  | -0.592 |
| H | 8.046 | 2.115 | -2.473 | C | 3.251  | -0.199 | -1.985 |
| N | 7.940 | 3.845 | -1.202 | H | 3.122  | -1.219 | -2.323 |
| C | 8.159 | 5.175 | -1.489 | C | 4.129  | 0.117  | -0.967 |
| H | 8.072 | 5.942 | -0.734 | H | 4.687  | -0.683 | -0.493 |
| C | 7.958 | 7.939 | 3.948  | C | 2.502  | 0.814  | -2.608 |
| H | 8.731 | 7.599 | 4.605  | O | 1.651  | 0.439  | -3.580 |
| H | 7.144 | 8.325 | 4.525  | H | 1.180  | 1.213  | -3.929 |
|   |       |       |        | C | 3.578  | 2.473  | -1.240 |
|   |       |       |        | H | 3.705  | 3.504  | -0.935 |

|    |       |        |        |
|----|-------|--------|--------|
| C  | 2.659 | 2.156  | -2.216 |
| H  | 2.061 | 2.935  | -2.676 |
| C  | 5.368 | 1.873  | 0.316  |
| O  | 5.807 | 3.047  | 0.324  |
| C  | 6.121 | 0.919  | 1.261  |
| H  | 5.966 | -0.147 | 1.073  |
| H  | 5.082 | 2.869  | 3.022  |
| O  | 7.488 | 1.240  | 1.080  |
| H  | 8.084 | 0.710  | 1.707  |
| O  | 5.798 | 1.166  | 2.627  |
| O  | 4.649 | 2.040  | 2.753  |
| Fe | 7.754 | 3.269  | 0.783  |

Model <sup>3</sup>A4'

E=-3130.535882 au ZPE=0.5650352558 au

|   |        |        |        |
|---|--------|--------|--------|
| C | 9.003  | 6.547  | -3.570 |
| H | 8.502  | 7.407  | -3.177 |
| H | 8.767  | 6.440  | -4.608 |
| N | 8.501  | 4.064  | -3.369 |
| H | 8.796  | 3.805  | -4.324 |
| C | 8.557  | 5.331  | -2.831 |
| C | 8.181  | 3.196  | -2.388 |
| H | 8.086  | 2.131  | -2.541 |
| N | 8.016  | 3.841  | -1.240 |
| C | 8.232  | 5.175  | -1.508 |
| H | 8.159  | 5.929  | -0.739 |
| C | 7.960  | 7.895  | 3.926  |
| H | 8.735  | 7.559  | 4.582  |
| H | 7.148  | 8.284  | 4.504  |
| N | 6.162  | 6.594  | 2.696  |
| H | 5.451  | 7.331  | 2.825  |
| C | 7.477  | 6.747  | 3.095  |
| C | 6.058  | 5.459  | 1.976  |
| H | 5.140  | 5.087  | 1.548  |
| N | 7.249  | 4.863  | 1.886  |
| C | 8.136  | 5.664  | 2.577  |
| H | 9.181  | 5.415  | 2.623  |
| C | 13.623 | -2.128 | -0.007 |
| H | 14.408 | -2.276 | 0.705  |
| H | 13.914 | -1.373 | -0.707 |
| C | 12.361 | -1.690 | 0.715  |
| C | 11.224 | -1.251 | 0.018  |
| H | 11.233 | -1.263 | -1.065 |
| C | 10.099 | -0.766 | 0.679  |

|    |        |        |        |
|----|--------|--------|--------|
| H  | 9.242  | -0.408 | 0.117  |
| C  | 10.097 | -0.698 | 2.071  |
| O  | 8.980  | -0.158 | 2.716  |
| H  | 9.284  | 0.338  | 3.520  |
| C  | 12.308 | -1.650 | 2.114  |
| H  | 13.162 | -2.000 | 2.688  |
| C  | 11.191 | -1.164 | 2.797  |
| H  | 11.186 | -1.123 | 3.881  |
| C  | 13.096 | 1.893  | -0.059 |
| H  | 12.981 | 0.852  | -0.279 |
| H  | 13.893 | 2.024  | 0.643  |
| N  | 11.677 | 2.559  | 1.890  |
| H  | 12.449 | 2.373  | 2.555  |
| C  | 11.823 | 2.423  | 0.526  |
| C  | 10.417 | 2.951  | 2.161  |
| H  | 10.030 | 3.101  | 3.155  |
| N  | 9.726  | 3.092  | 1.027  |
| C  | 10.602 | 2.766  | 0.002  |
| H  | 10.294 | 2.804  | -1.025 |
| C  | 4.310  | 1.488  | -0.727 |
| C  | 3.174  | -0.176 | -2.075 |
| H  | 3.027  | -1.198 | -2.401 |
| C  | 4.086  | 0.141  | -1.087 |
| H  | 4.652  | -0.661 | -0.626 |
| C  | 2.412  | 0.838  | -2.677 |
| O  | 1.526  | 0.460  | -3.619 |
| H  | 1.052  | 1.237  | -3.958 |
| C  | 3.546  | 2.497  | -1.355 |
| H  | 3.690  | 3.528  | -1.059 |
| C  | 2.593  | 2.179  | -2.300 |
| H  | 1.985  | 2.959  | -2.744 |
| C  | 5.375  | 1.880  | 0.162  |
| O  | 5.848  | 3.037  | 0.142  |
| C  | 6.007  | 0.918  | 1.180  |
| H  | 5.934  | -0.140 | 0.910  |
| H  | 5.943  | 2.438  | 3.410  |
| O  | 7.356  | 1.318  | 1.297  |
| H  | 7.940  | 0.707  | 1.852  |
| O  | 5.313  | 0.958  | 2.402  |
| O  | 5.162  | 2.334  | 2.841  |
| Fe | 7.761  | 3.255  | 0.704  |

Model <sup>3</sup>TS4'

E=-3130.527067 au ZPE=0.5642942460 au

|   |        |        |        |
|---|--------|--------|--------|
| C | 8.942  | 6.447  | -3.481 |
| H | 8.434  | 7.306  | -3.094 |
| H | 8.701  | 6.326  | -4.516 |
| N | 8.465  | 3.955  | -3.245 |
| H | 8.765  | 3.690  | -4.196 |
| C | 8.513  | 5.232  | -2.725 |
| C | 8.137  | 3.101  | -2.252 |
| H | 8.048  | 2.034  | -2.386 |
| N | 7.962  | 3.764  | -1.113 |
| C | 8.179  | 5.095  | -1.403 |
| H | 8.101  | 5.858  | -0.645 |
| C | 7.969  | 7.997  | 3.948  |
| H | 8.731  | 7.634  | 4.606  |
| H | 7.157  | 8.388  | 4.525  |
| N | 6.169  | 6.762  | 2.659  |
| H | 5.460  | 7.499  | 2.807  |
| C | 7.476  | 6.876  | 3.089  |
| C | 6.069  | 5.664  | 1.880  |
| H | 5.153  | 5.320  | 1.426  |
| N | 7.250  | 5.061  | 1.783  |
| C | 8.131  | 5.810  | 2.530  |
| H | 9.171  | 5.540  | 2.592  |
| C | 13.804 | -2.241 | -0.007 |
| H | 14.563 | -2.431 | 0.723  |
| H | 14.135 | -1.473 | -0.675 |
| C | 12.534 | -1.792 | 0.690  |
| C | 11.407 | -1.400 | -0.048 |
| H | 11.445 | -1.444 | -1.128 |
| C | 10.251 | -0.938 | 0.567  |
| H | 9.401  | -0.633 | -0.034 |
| C | 10.210 | -0.841 | 1.957  |
| O | 9.046  | -0.347 | 2.546  |
| H | 9.291  | 0.156  | 3.358  |
| C | 12.450 | -1.714 | 2.084  |
| H | 13.296 | -2.030 | 2.688  |
| C | 11.300 | -1.245 | 2.723  |
| H | 11.260 | -1.182 | 3.806  |
| C | 13.052 | 1.814  | -0.037 |
| H | 12.930 | 0.776  | -0.265 |
| H | 13.853 | 1.934  | 0.662  |
| N | 11.692 | 2.600  | 1.910  |
| H | 12.490 | 2.474  | 2.557  |

|    |        |        |        |
|----|--------|--------|--------|
| C  | 11.785 | 2.347  | 0.559  |
| C  | 10.435 | 2.991  | 2.197  |
| H  | 10.094 | 3.236  | 3.186  |
| N  | 9.692  | 3.014  | 1.087  |
| C  | 10.535 | 2.615  | 0.061  |
| H  | 10.191 | 2.550  | -0.955 |
| C  | 4.284  | 1.453  | -0.601 |
| C  | 3.226  | -0.194 | -2.030 |
| H  | 3.120  | -1.207 | -2.400 |
| C  | 4.117  | 0.115  | -1.021 |
| H  | 4.722  | -0.680 | -0.595 |
| C  | 2.430  | 0.817  | -2.594 |
| O  | 1.564  | 0.448  | -3.557 |
| H  | 1.074  | 1.223  | -3.880 |
| C  | 3.490  | 2.461  | -1.193 |
| H  | 3.596  | 3.484  | -0.854 |
| C  | 2.557  | 2.148  | -2.158 |
| H  | 1.922  | 2.922  | -2.575 |
| C  | 5.334  | 1.834  | 0.306  |
| O  | 5.755  | 3.011  | 0.367  |
| C  | 6.084  | 0.813  | 1.186  |
| H  | 5.528  | -0.124 | 1.320  |
| H  | 7.828  | 1.939  | 3.188  |
| O  | 7.350  | 0.665  | 0.635  |
| H  | 7.937  | 0.218  | 1.299  |
| O  | 6.152  | 1.262  | 2.545  |
| O  | 7.147  | 2.372  | 2.644  |
| Fe | 7.698  | 3.219  | 0.835  |

Model <sup>3</sup>A5

E=-3130.564798 au ZPE=0.5594894907 au

|   |       |       |        |
|---|-------|-------|--------|
| C | 8.884 | 6.340 | -3.361 |
| H | 8.362 | 7.205 | -3.010 |
| H | 8.626 | 6.158 | -4.384 |
| N | 8.553 | 3.844 | -2.966 |
| H | 8.862 | 3.544 | -3.903 |
| C | 8.500 | 5.155 | -2.532 |
| C | 8.258 | 3.039 | -1.928 |
| H | 8.269 | 1.963 | -1.986 |
| N | 7.998 | 3.762 | -0.835 |
| C | 8.134 | 5.085 | -1.213 |
| H | 7.987 | 5.892 | -0.515 |
| C | 7.783 | 7.983 | 3.887  |
| H | 8.520 | 7.631 | 4.578  |



|   |        |        |        |
|---|--------|--------|--------|
| H | 6.941  | 8.363  | 4.427  |
| N | 6.061  | 6.716  | 2.504  |
| H | 5.333  | 7.438  | 2.623  |
| C | 7.342  | 6.851  | 3.005  |
| C | 6.004  | 5.596  | 1.753  |
| H | 5.112  | 5.226  | 1.273  |
| N | 7.194  | 5.004  | 1.738  |
| C | 8.032  | 5.773  | 2.518  |
| H | 9.062  | 5.500  | 2.665  |
| C | 13.860 | -2.279 | -0.009 |
| H | 14.618 | -2.475 | 0.720  |
| H | 14.196 | -1.512 | -0.676 |
| C | 12.593 | -1.823 | 0.689  |
| C | 11.467 | -1.430 | -0.048 |
| H | 11.502 | -1.479 | -1.127 |
| C | 10.314 | -0.964 | 0.566  |
| H | 9.468  | -0.653 | -0.034 |
| C | 10.270 | -0.856 | 1.955  |
| O | 9.118  | -0.333 | 2.536  |
| H | 9.362  | 0.065  | 3.409  |
| C | 12.508 | -1.745 | 2.083  |
| H | 13.353 | -2.063 | 2.687  |
| C | 11.360 | -1.269 | 2.721  |
| H | 11.325 | -1.205 | 3.804  |
| C | 13.227 | 1.803  | -0.018 |
| H | 13.123 | 0.761  | -0.239 |
| H | 14.051 | 1.945  | 0.650  |
| N | 11.898 | 2.531  | 1.986  |
| H | 12.716 | 2.422  | 2.614  |
| C | 11.971 | 2.305  | 0.625  |
| C | 10.645 | 2.887  | 2.311  |
| H | 10.303 | 3.104  | 3.310  |
| N | 9.888  | 2.925  | 1.208  |
| C | 10.712 | 2.564  | 0.156  |
| H | 10.345 | 2.507  | -0.851 |
| C | 4.283  | 1.324  | -0.827 |
| C | 2.973  | -0.161 | -2.215 |
| H | 2.793  | -1.126 | -2.671 |
| C | 4.057  | 0.050  | -1.394 |
| H | 4.713  | -0.774 | -1.148 |
| C | 2.064  | 0.885  | -2.457 |
| O | 1.013  | 0.596  | -3.237 |
| H | 0.494  | 1.398  | -3.418 |
| C | 3.370  | 2.372  | -1.089 |

|    |       |        |        |
|----|-------|--------|--------|
| H  | 3.525 | 3.342  | -0.633 |
| C  | 2.267 | 2.157  | -1.889 |
| H  | 1.546 | 2.951  | -2.051 |
| C  | 5.448 | 1.602  | -0.039 |
| O  | 5.728 | 2.652  | 0.527  |
| C  | 6.612 | 0.441  | 0.021  |
| H  | 6.816 | 0.249  | -1.054 |
| H  | 8.032 | 1.851  | 3.023  |
| O  | 7.772 | 1.055  | 0.579  |
| H  | 8.127 | 0.492  | 1.321  |
| O  | 6.145 | -0.586 | 0.660  |
| O  | 7.638 | 2.718  | 2.844  |
| Fe | 7.830 | 3.147  | 1.118  |

Model <sup>3</sup>TS5

E=-3130.528221 au ZPE=0.5578039390 au

|   |        |        |        |
|---|--------|--------|--------|
| C | 8.853  | 6.295  | -3.367 |
| H | 8.337  | 7.158  | -3.000 |
| H | 8.592  | 6.133  | -4.392 |
| N | 8.473  | 3.798  | -3.023 |
| H | 8.786  | 3.510  | -3.962 |
| C | 8.462  | 5.099  | -2.558 |
| C | 8.147  | 2.980  | -2.000 |
| H | 8.112  | 1.906  | -2.087 |
| N | 7.914  | 3.683  | -0.892 |
| C | 8.093  | 5.008  | -1.241 |
| H | 7.975  | 5.803  | -0.525 |
| C | 7.861  | 7.850  | 3.847  |
| H | 8.613  | 7.507  | 4.526  |
| H | 7.012  | 8.195  | 4.399  |
| N | 6.159  | 6.559  | 2.473  |
| H | 5.423  | 7.270  | 2.601  |
| C | 7.448  | 6.722  | 2.947  |
| C | 6.107  | 5.434  | 1.730  |
| H | 5.214  | 5.035  | 1.277  |
| N | 7.311  | 4.868  | 1.690  |
| C | 8.152  | 5.658  | 2.443  |
| H | 9.189  | 5.407  | 2.562  |
| C | 13.920 | -2.331 | -0.010 |
| H | 14.657 | -2.544 | 0.736  |
| H | 14.282 | -1.562 | -0.660 |
| C | 12.643 | -1.866 | 0.660  |
| C | 11.555 | -1.441 | -0.115 |
| H | 11.632 | -1.473 | -1.191 |

|    |        |        |        |
|----|--------|--------|--------|
| C  | 10.388 | -0.963 | 0.458  |
| H  | 9.577  | -0.622 | -0.173 |
| C  | 10.299 | -0.874 | 1.845  |
| O  | 9.133  | -0.323 | 2.386  |
| H  | 9.353  | 0.072  | 3.269  |
| C  | 12.506 | -1.810 | 2.050  |
| H  | 13.321 | -2.154 | 2.681  |
| C  | 11.344 | -1.317 | 2.651  |
| H  | 11.270 | -1.261 | 3.732  |
| C  | 13.087 | 1.842  | 0.009  |
| H  | 12.964 | 0.799  | -0.195 |
| H  | 13.902 | 1.979  | 0.689  |
| N  | 11.747 | 2.620  | 1.978  |
| H  | 12.556 | 2.499  | 2.614  |
| C  | 11.829 | 2.383  | 0.621  |
| C  | 10.489 | 2.982  | 2.291  |
| H  | 10.137 | 3.196  | 3.287  |
| N  | 9.740  | 3.012  | 1.185  |
| C  | 10.572 | 2.638  | 0.140  |
| H  | 10.216 | 2.572  | -0.870 |
| C  | 4.362  | 1.320  | -0.729 |
| C  | 3.041  | -0.148 | -2.125 |
| H  | 2.804  | -1.128 | -2.523 |
| C  | 4.036  | 0.026  | -1.194 |
| H  | 4.564  | -0.837 | -0.806 |
| C  | 2.287  | 0.964  | -2.553 |
| O  | 1.298  | 0.711  | -3.418 |
| H  | 0.834  | 1.528  | -3.669 |
| C  | 3.621  | 2.430  | -1.188 |
| H  | 3.843  | 3.412  | -0.789 |
| C  | 2.576  | 2.257  | -2.071 |
| H  | 1.964  | 3.103  | -2.367 |
| C  | 5.467  | 1.538  | 0.200  |
| O  | 5.806  | 2.693  | 0.640  |
| C  | 6.698  | 0.477  | 0.116  |
| H  | 6.767  | -0.239 | -0.707 |
| H  | 8.035  | 1.799  | 3.051  |
| O  | 7.908  | 1.034  | 0.485  |
| H  | 8.331  | 0.524  | 1.260  |
| O  | 5.745  | 0.315  | 1.059  |
| O  | 7.581  | 2.623  | 2.824  |
| Fe | 7.729  | 3.039  | 1.079  |

Model <sup>3</sup>A6

E=-3130.567102 au ZPE=0.5635345707 au

|   |        |        |        |
|---|--------|--------|--------|
| C | 8.836  | 6.250  | -3.319 |
| H | 8.313  | 7.111  | -2.958 |
| H | 8.578  | 6.079  | -4.343 |
| N | 8.420  | 3.753  | -2.967 |
| H | 8.723  | 3.460  | -3.907 |
| C | 8.454  | 5.055  | -2.502 |
| C | 8.078  | 2.944  | -1.941 |
| H | 8.005  | 1.870  | -2.024 |
| N | 7.888  | 3.654  | -0.828 |
| C | 8.111  | 4.972  | -1.178 |
| H | 8.032  | 5.771  | -0.461 |
| C | 7.858  | 7.869  | 3.877  |
| H | 8.613  | 7.525  | 4.553  |
| H | 7.011  | 8.214  | 4.433  |
| N | 6.158  | 6.596  | 2.480  |
| H | 5.428  | 7.314  | 2.599  |
| C | 7.440  | 6.741  | 2.977  |
| C | 6.106  | 5.473  | 1.734  |
| H | 5.216  | 5.089  | 1.261  |
| N | 7.304  | 4.891  | 1.714  |
| C | 8.140  | 5.670  | 2.485  |
| H | 9.171  | 5.404  | 2.625  |
| C | 14.033 | -2.400 | -0.053 |
| H | 14.796 | -2.641 | 0.657  |
| H | 14.387 | -1.634 | -0.711 |
| C | 12.801 | -1.909 | 0.677  |
| C | 11.669 | -1.491 | -0.037 |
| H | 11.659 | -1.580 | -1.114 |
| C | 10.566 | -0.945 | 0.600  |
| H | 9.714  | -0.611 | 0.017  |
| C | 10.593 | -0.781 | 1.983  |
| O | 9.500  | -0.144 | 2.566  |
| H | 9.751  | 0.273  | 3.434  |
| C | 12.766 | -1.798 | 2.070  |
| H | 13.610 | -2.152 | 2.655  |
| C | 11.674 | -1.232 | 2.732  |
| H | 11.680 | -1.122 | 3.811  |
| C | 13.030 | 1.906  | 0.095  |
| H | 12.885 | 0.861  | -0.086 |
| H | 13.857 | 2.041  | 0.761  |
| N | 11.688 | 2.622  | 2.084  |
| H | 12.486 | 2.437  | 2.718  |

|    |        |        |        |
|----|--------|--------|--------|
| C  | 11.790 | 2.483  | 0.713  |
| C  | 10.435 | 2.995  | 2.405  |
| H  | 10.062 | 3.128  | 3.408  |
| N  | 9.710  | 3.134  | 1.292  |
| C  | 10.554 | 2.823  | 0.232  |
| H  | 10.221 | 2.860  | -0.787 |
| C  | 4.222  | 1.441  | -0.813 |
| C  | 2.885  | 0.039  | -2.260 |
| H  | 2.661  | -0.914 | -2.723 |
| C  | 3.933  | 0.181  | -1.383 |
| H  | 4.537  | -0.677 | -1.126 |
| C  | 2.070  | 1.143  | -2.555 |
| O  | 1.035  | 0.903  | -3.373 |
| H  | 0.565  | 1.725  | -3.590 |
| C  | 3.421  | 2.550  | -1.140 |
| H  | 3.618  | 3.510  | -0.679 |
| C  | 2.346  | 2.405  | -2.000 |
| H  | 1.700  | 3.249  | -2.212 |
| C  | 5.327  | 1.566  | 0.105  |
| O  | 5.753  | 2.613  | 0.627  |
| C  | 6.971  | 0.236  | 1.171  |
| H  | 7.195  | -0.792 | 1.436  |
| H  | 6.987  | 1.804  | 2.957  |
| O  | 8.040  | 1.028  | 0.839  |
| H  | 8.759  | 0.746  | 1.510  |
| O  | 5.908  | 0.354  | 0.337  |
| O  | 7.511  | 2.619  | 2.886  |
| Fe | 7.699  | 3.036  | 1.147  |

Model <sup>3</sup>TS6

E=-3130.541247 au ZPE=0.5622632074 au

|   |       |       |        |
|---|-------|-------|--------|
| C | 8.872 | 6.320 | -3.352 |
| H | 8.356 | 7.187 | -2.995 |
| H | 8.614 | 6.148 | -4.376 |
| N | 8.423 | 3.832 | -2.999 |
| H | 8.716 | 3.535 | -3.941 |
| C | 8.478 | 5.132 | -2.532 |
| C | 8.087 | 3.024 | -1.972 |
| H | 7.998 | 1.952 | -2.054 |
| N | 7.924 | 3.737 | -0.857 |
| C | 8.154 | 5.053 | -1.203 |
| H | 8.091 | 5.849 | -0.480 |
| C | 7.873 | 7.858 | 3.883  |
| H | 8.632 | 7.514 | 4.554  |

|   |        |        |        |
|---|--------|--------|--------|
| H | 7.031  | 8.204  | 4.445  |
| N | 6.162  | 6.590  | 2.500  |
| H | 5.435  | 7.313  | 2.621  |
| C | 7.448  | 6.730  | 2.988  |
| C | 6.098  | 5.469  | 1.754  |
| H | 5.205  | 5.095  | 1.280  |
| N | 7.293  | 4.879  | 1.727  |
| C | 8.140  | 5.656  | 2.490  |
| H | 9.173  | 5.390  | 2.616  |
| C | 14.029 | -2.406 | -0.056 |
| H | 14.786 | -2.645 | 0.662  |
| H | 14.388 | -1.641 | -0.712 |
| C | 12.790 | -1.915 | 0.662  |
| C | 11.657 | -1.515 | -0.061 |
| H | 11.652 | -1.623 | -1.136 |
| C | 10.548 | -0.969 | 0.562  |
| H | 9.688  | -0.660 | -0.024 |
| C | 10.567 | -0.780 | 1.944  |
| O | 9.475  | -0.131 | 2.500  |
| H | 9.715  | 0.286  | 3.368  |
| C | 12.748 | -1.784 | 2.053  |
| H | 13.592 | -2.124 | 2.647  |
| C | 11.650 | -1.214 | 2.702  |
| H | 11.652 | -1.091 | 3.779  |
| C | 13.021 | 1.892  | 0.098  |
| H | 12.881 | 0.848  | -0.089 |
| H | 13.843 | 2.027  | 0.770  |
| N | 11.663 | 2.604  | 2.079  |
| H | 12.456 | 2.423  | 2.719  |
| C | 11.776 | 2.462  | 0.710  |
| C | 10.405 | 2.974  | 2.389  |
| H | 10.029 | 3.107  | 3.391  |
| N | 9.688  | 3.109  | 1.271  |
| C | 10.542 | 2.796  | 0.218  |
| H | 10.218 | 2.829  | -0.804 |
| C | 4.183  | 1.454  | -0.750 |
| C | 2.941  | -0.038 | -2.187 |
| H | 2.758  | -1.015 | -2.617 |
| C | 3.938  | 0.162  | -1.258 |
| H | 4.546  | -0.671 | -0.927 |
| C | 2.126  | 1.037  | -2.577 |
| O | 1.137  | 0.750  | -3.440 |
| H | 0.661  | 1.559  | -3.694 |
| C | 3.392  | 2.535  | -1.179 |

|                                       |        |        |        |    |        |        |        |
|---------------------------------------|--------|--------|--------|----|--------|--------|--------|
| H                                     | 3.560  | 3.521  | -0.765 | C  | 10.140 | -0.838 | 0.805  |
| C                                     | 2.357  | 2.328  | -2.073 | H  | 9.247  | -0.504 | 0.286  |
| H                                     | 1.710  | 3.151  | -2.356 | C  | 10.216 | -0.747 | 2.193  |
| C                                     | 5.252  | 1.662  | 0.194  | O  | 9.139  | -0.199 | 2.897  |
| O                                     | 5.741  | 2.771  | 0.503  | H  | 9.491  | 0.277  | 3.696  |
| C                                     | 6.881  | 0.601  | 1.492  | C  | 12.430 | -1.684 | 2.136  |
| H                                     | 7.069  | -0.324 | 2.026  | H  | 13.311 | -2.027 | 2.670  |
| H                                     | 6.664  | 1.764  | 2.746  | C  | 11.347 | -1.196 | 2.868  |
| O                                     | 7.945  | 1.054  | 0.724  | H  | 11.396 | -1.139 | 3.951  |
| H                                     | 8.734  | 0.809  | 1.300  | C  | 13.029 | 1.867  | -0.020 |
| O                                     | 5.739  | 0.514  | 0.717  | H  | 12.927 | 0.825  | -0.241 |
| O                                     | 7.428  | 2.372  | 2.713  | H  | 13.818 | 2.006  | 0.689  |
| Fe                                    | 7.676  | 3.057  | 1.054  | N  | 11.598 | 2.539  | 1.916  |
| Model <sup>3</sup> A7                 |        |        |        | H  | 12.374 | 2.375  | 2.581  |
| E=-3130.658825 au ZPE=0.5692427303 au |        |        |        | C  | 11.744 | 2.384  | 0.554  |
| C                                     | 8.923  | 6.442  | -3.481 | C  | 10.328 | 2.898  | 2.187  |
| H                                     | 8.416  | 7.302  | -3.096 | H  | 9.939  | 3.053  | 3.180  |
| H                                     | 8.690  | 6.326  | -4.519 | N  | 9.631  | 3.002  | 1.051  |
| N                                     | 8.433  | 3.957  | -3.270 | C  | 10.513 | 2.686  | 0.029  |
| H                                     | 8.746  | 3.700  | -4.218 | H  | 10.203 | 2.699  | -0.999 |
| C                                     | 8.481  | 5.227  | -2.733 | C  | 4.203  | 1.468  | -0.935 |
| C                                     | 8.073  | 3.095  | -2.296 | C  | 3.081  | -0.139 | -2.350 |
| H                                     | 7.973  | 2.031  | -2.449 | H  | 2.877  | -1.155 | -2.664 |
| N                                     | 7.878  | 3.744  | -1.152 | C  | 3.919  | 0.134  | -1.288 |
| C                                     | 8.117  | 5.077  | -1.420 | H  | 4.379  | -0.675 | -0.735 |
| H                                     | 8.028  | 5.832  | -0.654 | C  | 2.476  | 0.916  | -3.048 |
| C                                     | 7.863  | 7.878  | 3.930  | O  | 1.668  | 0.576  | -4.073 |
| H                                     | 8.632  | 7.531  | 4.588  | H  | 1.247  | 1.369  | -4.442 |
| H                                     | 7.050  | 8.267  | 4.506  | C  | 3.606  | 2.520  | -1.650 |
| N                                     | 6.071  | 6.614  | 2.648  | H  | 3.814  | 3.544  | -1.364 |
| H                                     | 5.368  | 7.360  | 2.765  | C  | 2.733  | 2.249  | -2.689 |
| C                                     | 7.377  | 6.739  | 3.085  | H  | 2.257  | 3.060  | -3.228 |
| C                                     | 5.966  | 5.481  | 1.922  | C  | 5.164  | 1.760  | 0.115  |
| H                                     | 5.052  | 5.126  | 1.471  | O  | 5.669  | 2.879  | 0.304  |
| N                                     | 7.143  | 4.862  | 1.861  | C  | 6.171  | 0.852  | 2.102  |
| C                                     | 8.026  | 5.642  | 2.581  | H  | 6.319  | -0.175 | 2.447  |
| H                                     | 9.063  | 5.370  | 2.665  | H  | 4.506  | 1.304  | 2.950  |
| C                                     | 13.651 | -2.160 | -0.033 | O  | 7.414  | 1.456  | 1.931  |
| H                                     | 14.463 | -2.304 | 0.649  | H  | 8.156  | 0.839  | 2.232  |
| H                                     | 13.909 | -1.399 | -0.739 | O  | 5.515  | 0.671  | 0.833  |
| C                                     | 12.412 | -1.737 | 0.737  | O  | 5.421  | 1.632  | 2.942  |
| C                                     | 11.236 | -1.321 | 0.092  | Fe | 7.648  | 3.131  | 0.792  |
| H                                     | 11.189 | -1.350 | -0.990 |    |        |        |        |

Model <sup>3</sup>TS7

E=-3130.653057 au ZPE=0.5682478973 au

|   |        |        |        |
|---|--------|--------|--------|
| C | 8.918  | 6.437  | -3.477 |
| H | 8.415  | 7.299  | -3.091 |
| H | 8.685  | 6.323  | -4.515 |
| N | 8.422  | 3.952  | -3.265 |
| H | 8.743  | 3.693  | -4.210 |
| C | 8.470  | 5.223  | -2.730 |
| C | 8.044  | 3.094  | -2.294 |
| H | 7.941  | 2.030  | -2.447 |
| N | 7.835  | 3.746  | -1.154 |
| C | 8.087  | 5.077  | -1.421 |
| H | 7.995  | 5.835  | -0.659 |
| C | 7.868  | 7.882  | 3.933  |
| H | 8.637  | 7.532  | 4.589  |
| H | 7.056  | 8.272  | 4.511  |
| N | 6.074  | 6.632  | 2.644  |
| H | 5.375  | 7.383  | 2.761  |
| C | 7.378  | 6.745  | 3.087  |
| C | 5.964  | 5.501  | 1.915  |
| H | 5.050  | 5.160  | 1.454  |
| N | 7.136  | 4.872  | 1.860  |
| C | 8.021  | 5.644  | 2.585  |
| H | 9.056  | 5.365  | 2.672  |
| C | 13.661 | -2.163 | -0.033 |
| H | 14.472 | -2.308 | 0.649  |
| H | 13.921 | -1.403 | -0.740 |
| C | 12.423 | -1.738 | 0.736  |
| C | 11.249 | -1.321 | 0.089  |
| H | 11.203 | -1.350 | -0.993 |
| C | 10.152 | -0.838 | 0.800  |
| H | 9.260  | -0.503 | 0.279  |
| C | 10.225 | -0.748 | 2.188  |
| O | 9.146  | -0.198 | 2.886  |
| H | 9.493  | 0.279  | 3.687  |
| C | 12.437 | -1.687 | 2.135  |
| H | 13.318 | -2.031 | 2.670  |
| C | 11.354 | -1.198 | 2.866  |
| H | 11.400 | -1.141 | 3.948  |
| C | 13.019 | 1.873  | -0.024 |
| H | 12.915 | 0.831  | -0.244 |
| H | 13.807 | 2.011  | 0.687  |
| N | 11.586 | 2.545  | 1.909  |
| H | 12.360 | 2.379  | 2.575  |

|    |        |        |        |
|----|--------|--------|--------|
| C  | 11.734 | 2.394  | 0.547  |
| C  | 10.316 | 2.903  | 2.179  |
| H  | 9.926  | 3.055  | 3.172  |
| N  | 9.619  | 3.011  | 1.042  |
| C  | 10.503 | 2.698  | 0.020  |
| H  | 10.193 | 2.714  | -1.009 |
| C  | 4.207  | 1.438  | -0.911 |
| C  | 3.091  | -0.150 | -2.350 |
| H  | 2.884  | -1.163 | -2.675 |
| C  | 3.920  | 0.108  | -1.278 |
| H  | 4.370  | -0.708 | -0.727 |
| C  | 2.495  | 0.915  | -3.044 |
| O  | 1.693  | 0.587  | -4.075 |
| H  | 1.275  | 1.385  | -4.439 |
| C  | 3.618  | 2.500  | -1.620 |
| H  | 3.823  | 3.520  | -1.320 |
| C  | 2.755  | 2.243  | -2.671 |
| H  | 2.285  | 3.062  | -3.206 |
| C  | 5.132  | 1.725  | 0.168  |
| O  | 5.613  | 2.851  | 0.399  |
| C  | 6.179  | 0.811  | 2.127  |
| H  | 6.385  | -0.203 | 2.471  |
| H  | 4.705  | 1.963  | 2.672  |
| O  | 7.420  | 1.427  | 1.861  |
| H  | 8.173  | 0.835  | 2.182  |
| O  | 5.459  | 0.639  | 0.901  |
| O  | 5.456  | 1.497  | 3.067  |
| Fe | 7.634  | 3.130  | 0.801  |

Model <sup>3</sup>A8

E=-3130.656676 au ZPE=0.5682400269 au

|   |       |       |        |
|---|-------|-------|--------|
| C | 8.918 | 6.440 | -3.490 |
| H | 8.414 | 7.301 | -3.104 |
| H | 8.687 | 6.327 | -4.529 |
| N | 8.427 | 3.953 | -3.277 |
| H | 8.745 | 3.694 | -4.224 |
| C | 8.469 | 5.225 | -2.745 |
| C | 8.054 | 3.094 | -2.305 |
| H | 7.955 | 2.030 | -2.456 |
| N | 7.843 | 3.747 | -1.166 |
| C | 8.087 | 5.080 | -1.436 |
| H | 7.991 | 5.839 | -0.675 |
| C | 7.878 | 7.878 | 3.940  |
| H | 8.649 | 7.534 | 4.598  |

|   |        |        |        |
|---|--------|--------|--------|
| H | 7.064  | 8.266  | 4.516  |
| N | 6.096  | 6.623  | 2.639  |
| H | 5.395  | 7.373  | 2.747  |
| C | 7.394  | 6.737  | 3.098  |
| C | 5.991  | 5.487  | 1.918  |
| H | 5.084  | 5.148  | 1.442  |
| N | 7.164  | 4.852  | 1.885  |
| C | 8.042  | 5.630  | 2.613  |
| H | 9.076  | 5.353  | 2.711  |
| C | 13.694 | -2.175 | -0.036 |
| H | 14.508 | -2.328 | 0.642  |
| H | 13.955 | -1.413 | -0.741 |
| C | 12.463 | -1.745 | 0.740  |
| C | 11.289 | -1.320 | 0.097  |
| H | 11.239 | -1.347 | -0.985 |
| C | 10.198 | -0.832 | 0.814  |
| H | 9.305  | -0.490 | 0.299  |
| C | 10.279 | -0.746 | 2.202  |
| O | 9.205  | -0.191 | 2.906  |
| H | 9.557  | 0.299  | 3.697  |
| C | 12.484 | -1.699 | 2.139  |
| H | 13.363 | -2.052 | 2.669  |
| C | 11.407 | -1.205 | 2.875  |
| H | 11.455 | -1.151 | 3.958  |
| C | 13.056 | 1.877  | -0.048 |
| H | 12.946 | 0.835  | -0.266 |
| H | 13.846 | 2.012  | 0.661  |
| N | 11.635 | 2.568  | 1.886  |
| H | 12.410 | 2.401  | 2.552  |
| C | 11.776 | 2.406  | 0.524  |
| C | 10.369 | 2.941  | 2.158  |
| H | 9.984  | 3.099  | 3.152  |
| N | 9.671  | 3.047  | 1.023  |
| C | 10.546 | 2.717  | -0.001 |
| H | 10.230 | 2.729  | -1.027 |
| C | 4.264  | 1.459  | -0.880 |
| C | 3.145  | -0.117 | -2.330 |
| H | 2.937  | -1.126 | -2.664 |
| C | 3.984  | 0.133  | -1.265 |
| H | 4.444  | -0.689 | -0.728 |
| C | 2.533  | 0.954  | -3.001 |
| O | 1.719  | 0.636  | -4.026 |
| H | 1.289  | 1.435  | -4.373 |
| C | 3.659  | 2.527  | -1.566 |

|    |       |        |        |
|----|-------|--------|--------|
| H  | 3.853 | 3.542  | -1.246 |
| C  | 2.789 | 2.279  | -2.613 |
| H  | 2.306 | 3.102  | -3.129 |
| C  | 5.174 | 1.732  | 0.212  |
| O  | 5.642 | 2.862  | 0.479  |
| C  | 6.280 | 0.846  | 2.130  |
| H  | 6.413 | -0.154 | 2.535  |
| H  | 5.486 | 2.498  | 2.691  |
| O  | 7.534 | 1.369  | 1.763  |
| H  | 8.278 | 0.810  | 2.170  |
| O  | 5.518 | 0.647  | 0.924  |
| O  | 5.621 | 1.607  | 3.052  |
| Fe | 7.691 | 3.138  | 0.791  |

Model <sup>3</sup>TS8

E=-3130.624240 au ZPE=0.5638701460 au

|   |        |        |        |
|---|--------|--------|--------|
| C | 8.883  | 6.384  | -3.460 |
| H | 8.377  | 7.242  | -3.069 |
| H | 8.650  | 6.275  | -4.499 |
| N | 8.406  | 3.891  | -3.253 |
| H | 8.732  | 3.636  | -4.198 |
| C | 8.439  | 5.163  | -2.719 |
| C | 8.016  | 3.029  | -2.290 |
| H | 7.912  | 1.966  | -2.445 |
| N | 7.785  | 3.681  | -1.153 |
| C | 8.035  | 5.016  | -1.418 |
| H | 7.924  | 5.774  | -0.658 |
| C | 7.873  | 7.895  | 3.944  |
| H | 8.641  | 7.546  | 4.602  |
| H | 7.060  | 8.286  | 4.520  |
| N | 6.087  | 6.649  | 2.638  |
| H | 5.387  | 7.401  | 2.750  |
| C | 7.385  | 6.758  | 3.099  |
| C | 5.980  | 5.518  | 1.912  |
| H | 5.070  | 5.179  | 1.441  |
| N | 7.151  | 4.882  | 1.876  |
| C | 8.031  | 5.653  | 2.609  |
| H | 9.064  | 5.373  | 2.707  |
| C | 13.693 | -2.181 | -0.053 |
| H | 14.509 | -2.332 | 0.623  |
| H | 13.951 | -1.420 | -0.759 |
| C | 12.463 | -1.753 | 0.726  |
| C | 11.285 | -1.328 | 0.089  |
| H | 11.230 | -1.357 | -0.993 |

|    |        |        |        |
|----|--------|--------|--------|
| C  | 10.195 | -0.841 | 0.810  |
| H  | 9.296  | -0.510 | 0.300  |
| C  | 10.288 | -0.758 | 2.196  |
| O  | 9.223  | -0.201 | 2.924  |
| H  | 9.600  | 0.266  | 3.719  |
| C  | 12.491 | -1.709 | 2.125  |
| H  | 13.372 | -2.064 | 2.651  |
| C  | 11.418 | -1.216 | 2.866  |
| H  | 11.472 | -1.161 | 3.948  |
| C  | 13.050 | 1.872  | -0.061 |
| H  | 12.942 | 0.830  | -0.278 |
| H  | 13.837 | 2.009  | 0.651  |
| N  | 11.628 | 2.573  | 1.867  |
| H  | 12.405 | 2.412  | 2.533  |
| C  | 11.767 | 2.400  | 0.506  |
| C  | 10.364 | 2.946  | 2.138  |
| H  | 9.980  | 3.113  | 3.132  |
| N  | 9.661  | 3.038  | 1.003  |
| C  | 10.535 | 2.703  | -0.019 |
| H  | 10.216 | 2.707  | -1.045 |
| C  | 4.400  | 1.412  | -0.896 |
| C  | 3.232  | -0.098 | -2.380 |
| H  | 3.012  | -1.092 | -2.752 |
| C  | 4.127  | 0.108  | -1.351 |
| H  | 4.624  | -0.727 | -0.871 |
| C  | 2.576  | 0.999  | -2.961 |
| O  | 1.726  | 0.725  | -3.971 |
| H  | 1.278  | 1.535  | -4.264 |
| C  | 3.729  | 2.504  | -1.470 |
| H  | 3.902  | 3.500  | -1.085 |
| C  | 2.821  | 2.302  | -2.499 |
| H  | 2.294  | 3.143  | -2.936 |
| C  | 5.327  | 1.573  | 0.212  |
| O  | 5.605  | 2.794  | 0.673  |
| C  | 6.417  | 1.154  | 2.669  |
| H  | 6.385  | 0.143  | 3.061  |
| H  | 5.433  | 2.595  | 2.013  |
| O  | 7.612  | 1.613  | 2.326  |
| H  | 8.329  | 0.864  | 2.411  |
| O  | 5.851  | 0.562  | 0.755  |
| O  | 5.473  | 1.967  | 2.914  |
| Fe | 7.673  | 3.149  | 0.812  |

Model <sup>3</sup>P

E=-3130.656142 au ZPE=0.5670300877 au

|   |        |        |        |
|---|--------|--------|--------|
| C | 8.957  | 6.485  | -3.511 |
| H | 8.457  | 7.346  | -3.120 |
| H | 8.720  | 6.375  | -4.549 |
| N | 8.468  | 4.002  | -3.306 |
| H | 8.775  | 3.747  | -4.258 |
| C | 8.511  | 5.270  | -2.767 |
| C | 8.109  | 3.133  | -2.342 |
| H | 7.995  | 2.071  | -2.491 |
| N | 7.906  | 3.781  | -1.196 |
| C | 8.144  | 5.116  | -1.455 |
| H | 8.050  | 5.869  | -0.687 |
| C | 7.889  | 7.817  | 3.923  |
| H | 8.665  | 7.465  | 4.571  |
| H | 7.081  | 8.201  | 4.510  |
| N | 6.101  | 6.598  | 2.598  |
| H | 5.409  | 7.356  | 2.710  |
| C | 7.396  | 6.685  | 3.074  |
| C | 5.989  | 5.471  | 1.863  |
| H | 5.076  | 5.161  | 1.378  |
| N | 7.147  | 4.812  | 1.839  |
| C | 8.027  | 5.569  | 2.588  |
| H | 9.055  | 5.275  | 2.698  |
| C | 13.571 | -2.125 | -0.038 |
| H | 14.398 | -2.243 | 0.630  |
| H | 13.802 | -1.372 | -0.762 |
| C | 12.339 | -1.711 | 0.749  |
| C | 11.145 | -1.309 | 0.128  |
| H | 11.072 | -1.350 | -0.952 |
| C | 10.060 | -0.823 | 0.860  |
| H | 9.153  | -0.502 | 0.357  |
| C | 10.174 | -0.717 | 2.244  |
| O | 9.122  | -0.152 | 2.985  |
| H | 9.515  | 0.321  | 3.768  |
| C | 12.386 | -1.650 | 2.148  |
| H | 13.281 | -1.986 | 2.665  |
| C | 11.319 | -1.160 | 2.900  |
| H | 11.390 | -1.094 | 3.980  |
| C | 13.095 | 1.841  | -0.068 |
| H | 13.015 | 0.799  | -0.297 |
| H | 13.877 | 1.990  | 0.646  |
| N | 11.657 | 2.545  | 1.856  |
| H | 12.438 | 2.424  | 2.526  |

|    |        |        |        |
|----|--------|--------|--------|
| C  | 11.799 | 2.328  | 0.502  |
| C  | 10.380 | 2.884  | 2.117  |
| H  | 9.994  | 3.081  | 3.104  |
| N  | 9.674  | 2.911  | 0.981  |
| C  | 10.557 | 2.567  | -0.029 |
| H  | 10.234 | 2.512  | -1.053 |
| C  | 4.333  | 1.427  | -1.214 |
| C  | 2.942  | -0.114 | -2.455 |
| H  | 2.766  | -1.074 | -2.925 |
| C  | 4.135  | 0.176  | -1.828 |
| H  | 4.937  | -0.550 | -1.780 |
| C  | 1.925  | 0.857  | -2.487 |
| O  | 0.777  | 0.515  | -3.104 |
| H  | 0.210  | 1.299  | -3.187 |
| C  | 3.311  | 2.393  | -1.254 |
| H  | 3.450  | 3.357  | -0.781 |
| C  | 2.116  | 2.113  | -1.893 |
| H  | 1.318  | 2.849  | -1.908 |
| C  | 5.609  | 1.668  | -0.577 |
| O  | 5.677  | 2.792  | 0.273  |
| C  | 6.332  | 1.389  | 2.964  |
| H  | 6.491  | 0.708  | 3.811  |
| H  | 5.208  | 2.591  | 1.130  |
| O  | 7.420  | 1.559  | 2.208  |
| H  | 8.165  | 0.879  | 2.443  |
| O  | 6.634  | 1.020  | -0.719 |
| O  | 5.273  | 1.940  | 2.748  |
| Fe | 7.698  | 3.080  | 0.691  |

Model 7A2

E=-3130.515704 au ZPE=0.5555867853 au

|   |       |       |        |
|---|-------|-------|--------|
| C | 8.879 | 6.365 | -3.406 |
| H | 8.363 | 7.231 | -3.048 |
| H | 8.643 | 6.210 | -4.438 |
| N | 8.444 | 3.871 | -3.083 |
| H | 8.763 | 3.582 | -4.022 |
| C | 8.455 | 5.168 | -2.612 |
| C | 8.087 | 3.053 | -2.068 |
| H | 8.009 | 1.982 | -2.179 |
| N | 7.861 | 3.749 | -0.951 |
| C | 8.074 | 5.073 | -1.297 |
| H | 7.958 | 5.870 | -0.582 |
| C | 7.790 | 8.057 | 3.906  |

|   |        |        |        |
|---|--------|--------|--------|
| H | 8.528  | 7.680  | 4.582  |
| H | 6.964  | 8.449  | 4.462  |
| N | 6.027  | 6.855  | 2.521  |
| H | 5.313  | 7.593  | 2.660  |
| C | 7.312  | 6.946  | 3.016  |
| C | 5.942  | 5.762  | 1.733  |
| H | 5.038  | 5.447  | 1.236  |
| N | 7.117  | 5.136  | 1.688  |
| C | 7.975  | 5.869  | 2.486  |
| H | 9.002  | 5.577  | 2.613  |
| C | 13.807 | -2.264 | -0.011 |
| H | 14.563 | -2.449 | 0.723  |
| H | 14.133 | -1.488 | -0.672 |
| C | 12.527 | -1.835 | 0.679  |
| C | 11.410 | -1.432 | -0.067 |
| H | 11.467 | -1.440 | -1.146 |
| C | 10.236 | -1.010 | 0.542  |
| H | 9.395  | -0.691 | -0.063 |
| C | 10.169 | -0.966 | 1.932  |
| O | 8.976  | -0.517 | 2.513  |
| H | 9.178  | -0.054 | 3.371  |
| C | 12.419 | -1.800 | 2.073  |
| H | 13.262 | -2.119 | 2.681  |
| C | 11.251 | -1.371 | 2.708  |
| H | 11.197 | -1.338 | 3.792  |
| C | 13.052 | 1.798  | 0.045  |
| H | 12.948 | 0.758  | -0.182 |
| H | 13.873 | 1.936  | 0.717  |
| N | 11.706 | 2.421  | 2.060  |
| H | 12.520 | 2.252  | 2.682  |
| C | 11.789 | 2.300  | 0.687  |
| C | 10.456 | 2.784  | 2.402  |
| H | 10.125 | 2.950  | 3.415  |
| N | 9.698  | 2.923  | 1.306  |
| C | 10.535 | 2.621  | 0.231  |
| H | 10.186 | 2.662  | -0.785 |
| C | 4.331  | 1.168  | -0.747 |
| C | 3.103  | -0.297 | -2.246 |
| H | 2.956  | -1.257 | -2.728 |
| C | 4.132  | -0.095 | -1.352 |
| H | 4.792  | -0.923 | -1.124 |
| C | 2.221  | 0.756  | -2.546 |
| O | 1.234  | 0.486  | -3.418 |
| H | 0.730  | 1.293  | -3.618 |



|    |       |        |        |
|----|-------|--------|--------|
| C  | 3.437 | 2.215  | -1.064 |
| H  | 3.569 | 3.180  | -0.592 |
| C  | 2.390 | 2.015  | -1.943 |
| H  | 1.691 | 2.818  | -2.154 |
| C  | 5.469 | 1.429  | 0.112  |
| O  | 5.704 | 2.619  | 0.565  |
| C  | 6.407 | 0.408  | 0.445  |
| H  | 6.231 | -0.661 | 0.372  |
| H  | 5.368 | 2.721  | 2.448  |
| O  | 7.582 | 0.839  | 0.892  |
| H  | 8.107 | 0.233  | 1.549  |
| O  | 7.220 | 2.690  | 2.889  |
| O  | 5.867 | 2.689  | 3.303  |
| Fe | 7.579 | 3.149  | 1.150  |

Model <sup>7</sup>TS2

E=-3130.473841 au ZPE=0.5615801553 au

|   |        |        |        |
|---|--------|--------|--------|
| C | 8.998  | 6.539  | -3.500 |
| H | 8.487  | 7.436  | -3.145 |
| H | 8.773  | 6.422  | -4.562 |
| N | 8.466  | 4.069  | -3.211 |
| H | 8.747  | 3.779  | -4.161 |
| C | 8.551  | 5.354  | -2.713 |
| C | 8.131  | 3.241  | -2.206 |
| H | 7.991  | 2.177  | -2.322 |
| N | 7.998  | 3.928  | -1.074 |
| C | 8.242  | 5.249  | -1.382 |
| H | 8.195  | 6.030  | -0.639 |
| C | 7.863  | 7.970  | 3.895  |
| H | 8.633  | 7.591  | 4.571  |
| H | 7.040  | 8.384  | 4.486  |
| N | 6.061  | 6.716  | 2.618  |
| H | 5.354  | 7.458  | 2.763  |
| C | 7.376  | 6.843  | 3.034  |
| C | 5.937  | 5.597  | 1.887  |
| H | 5.018  | 5.237  | 1.451  |
| N | 7.122  | 4.987  | 1.802  |
| C | 8.026  | 5.759  | 2.509  |
| H | 9.063  | 5.482  | 2.572  |
| C | 13.786 | -2.261 | -0.006 |
| H | 14.561 | -2.460 | 0.740  |
| H | 14.151 | -1.483 | -0.689 |
| C | 12.501 | -1.820 | 0.667  |
| C | 11.393 | -1.421 | -0.095 |

|    |        |        |        |
|----|--------|--------|--------|
| H  | 11.457 | -1.460 | -1.172 |
| C  | 10.224 | -0.958 | 0.492  |
| H  | 9.389  | -0.647 | -0.126 |
| C  | 10.148 | -0.863 | 1.881  |
| O  | 8.980  | -0.336 | 2.427  |
| H  | 9.185  | 0.085  | 3.300  |
| C  | 12.379 | -1.756 | 2.059  |
| H  | 13.209 | -2.078 | 2.682  |
| C  | 11.216 | -1.283 | 2.672  |
| H  | 11.155 | -1.228 | 3.754  |
| C  | 12.987 | 1.819  | 0.060  |
| H  | 12.913 | 0.750  | -0.162 |
| H  | 13.799 | 1.937  | 0.782  |
| N  | 11.584 | 2.446  | 2.038  |
| H  | 12.375 | 2.266  | 2.683  |
| C  | 11.713 | 2.326  | 0.666  |
| C  | 10.325 | 2.802  | 2.340  |
| H  | 9.959  | 2.953  | 3.344  |
| N  | 9.608  | 2.938  | 1.213  |
| C  | 10.478 | 2.639  | 0.168  |
| H  | 10.158 | 2.673  | -0.856 |
| C  | 4.253  | 1.249  | -0.744 |
| C  | 3.128  | -0.438 | -2.082 |
| H  | 3.043  | -1.455 | -2.445 |
| C  | 4.088  | -0.095 | -1.147 |
| H  | 4.758  | -0.861 | -0.769 |
| C  | 2.268  | 0.543  | -2.600 |
| O  | 1.341  | 0.146  | -3.507 |
| H  | 0.851  | 0.922  | -3.819 |
| C  | 3.385  | 2.226  | -1.285 |
| H  | 3.490  | 3.258  | -0.972 |
| C  | 2.394  | 1.877  | -2.183 |
| H  | 1.718  | 2.634  | -2.567 |
| C  | 5.368  | 1.673  | 0.058  |
| O  | 5.794  | 2.931  | -0.033 |
| C  | 6.214  | 0.857  | 0.885  |
| H  | 5.882  | -0.101 | 1.274  |
| H  | 4.634  | 2.317  | 2.226  |
| O  | 7.564  | 0.950  | 0.576  |
| H  | 8.110  | 0.499  | 1.296  |
| O  | 6.502  | 1.930  | 2.292  |
| O  | 5.332  | 2.502  | 2.890  |
| Fe | 7.527  | 3.219  | 0.862  |

Model 7A3

E=-3130.486325 au ZPE=0.5669586703 au

|   |        |        |        |
|---|--------|--------|--------|
| C | 8.993  | 6.536  | -3.563 |
| H | 8.496  | 7.411  | -3.198 |
| H | 8.774  | 6.409  | -4.603 |
| N | 8.442  | 4.061  | -3.314 |
| H | 8.744  | 3.778  | -4.261 |
| C | 8.518  | 5.342  | -2.805 |
| C | 8.073  | 3.225  | -2.328 |
| H | 7.935  | 2.162  | -2.455 |
| N | 7.901  | 3.909  | -1.197 |
| C | 8.162  | 5.232  | -1.489 |
| H | 8.094  | 6.008  | -0.742 |
| C | 7.957  | 7.975  | 3.925  |
| H | 8.725  | 7.623  | 4.582  |
| H | 7.142  | 8.359  | 4.502  |
| N | 6.162  | 6.721  | 2.650  |
| H | 5.453  | 7.462  | 2.800  |
| C | 7.475  | 6.845  | 3.071  |
| C | 6.042  | 5.612  | 1.906  |
| H | 5.130  | 5.257  | 1.451  |
| N | 7.231  | 5.003  | 1.817  |
| C | 8.129  | 5.768  | 2.537  |
| H | 9.167  | 5.495  | 2.599  |
| C | 13.679 | -2.178 | -0.014 |
| H | 14.458 | -2.341 | 0.701  |
| H | 13.981 | -1.417 | -0.703 |
| C | 12.416 | -1.738 | 0.705  |
| C | 11.270 | -1.335 | 0.002  |
| H | 11.272 | -1.383 | -1.079 |
| C | 10.142 | -0.846 | 0.653  |
| H | 9.275  | -0.522 | 0.086  |
| C | 10.149 | -0.732 | 2.043  |
| O | 9.034  | -0.174 | 2.667  |
| H | 9.321  | 0.282  | 3.500  |
| C | 12.370 | -1.661 | 2.102  |
| H | 13.229 | -1.989 | 2.682  |
| C | 11.251 | -1.168 | 2.776  |
| H | 11.251 | -1.101 | 3.859  |
| C | 13.030 | 1.852  | -0.030 |
| H | 12.921 | 0.812  | -0.256 |
| H | 13.828 | 1.983  | 0.671  |
| N | 11.621 | 2.504  | 1.931  |

|    |        |        |        |
|----|--------|--------|--------|
| H  | 12.403 | 2.317  | 2.586  |
| C  | 11.755 | 2.371  | 0.562  |
| C  | 10.365 | 2.878  | 2.222  |
| H  | 9.993  | 3.029  | 3.224  |
| N  | 9.657  | 3.017  | 1.092  |
| C  | 10.526 | 2.700  | 0.054  |
| H  | 10.207 | 2.734  | -0.972 |
| C  | 4.374  | 1.403  | -0.614 |
| C  | 3.291  | -0.250 | -2.043 |
| H  | 3.149  | -1.272 | -2.374 |
| C  | 4.153  | 0.052  | -1.009 |
| H  | 4.690  | -0.754 | -0.517 |
| C  | 2.579  | 0.768  | -2.703 |
| O  | 1.734  | 0.394  | -3.698 |
| H  | 1.276  | 1.177  | -4.044 |
| C  | 3.656  | 2.418  | -1.314 |
| H  | 3.780  | 3.449  | -1.007 |
| C  | 2.771  | 2.107  | -2.326 |
| H  | 2.212  | 2.897  | -2.818 |
| C  | 5.292  | 1.781  | 0.393  |
| O  | 5.718  | 3.078  | 0.465  |
| C  | 6.049  | 0.959  | 1.366  |
| H  | 5.818  | -0.108 | 1.387  |
| H  | 4.346  | 2.487  | 2.551  |
| O  | 7.443  | 1.190  | 1.078  |
| H  | 8.050  | 0.702  | 1.724  |
| O  | 5.976  | 1.527  | 2.699  |
| O  | 4.594  | 1.698  | 3.068  |
| Fe | 7.583  | 3.290  | 0.744  |

Model 7TS3'

E=-3130.480662 au ZPE=0.5666156908 au

|   |       |       |        |
|---|-------|-------|--------|
| C | 8.962 | 6.503 | -3.541 |
| H | 8.451 | 7.396 | -3.179 |
| H | 8.754 | 6.405 | -4.609 |
| N | 8.422 | 4.024 | -3.283 |
| H | 8.736 | 3.739 | -4.226 |
| C | 8.485 | 5.310 | -2.782 |
| C | 8.029 | 3.194 | -2.302 |
| H | 7.898 | 2.129 | -2.423 |
| N | 7.829 | 3.885 | -1.178 |
| C | 8.098 | 5.209 | -1.473 |
| H | 8.012 | 5.990 | -0.735 |
| C | 7.945 | 7.991 | 3.936  |

|   |        |        |        |
|---|--------|--------|--------|
| H | 8.726  | 7.622  | 4.605  |
| H | 7.128  | 8.407  | 4.533  |
| N | 6.144  | 6.732  | 2.672  |
| H | 5.436  | 7.474  | 2.821  |
| C | 7.458  | 6.860  | 3.087  |
| C | 6.020  | 5.617  | 1.937  |
| H | 5.104  | 5.259  | 1.494  |
| N | 7.211  | 5.009  | 1.848  |
| C | 8.112  | 5.781  | 2.558  |
| H | 9.151  | 5.512  | 2.615  |
| C | 13.690 | -2.176 | -0.032 |
| H | 14.501 | -2.339 | 0.685  |
| H | 14.013 | -1.412 | -0.748 |
| C | 12.436 | -1.732 | 0.699  |
| C | 11.292 | -1.303 | 0.007  |
| H | 11.288 | -1.336 | -1.075 |
| C | 10.176 | -0.807 | 0.673  |
| H | 9.311  | -0.460 | 0.118  |
| C | 10.192 | -0.717 | 2.065  |
| O | 9.087  | -0.156 | 2.703  |
| H | 9.381  | 0.286  | 3.541  |
| C | 12.399 | -1.676 | 2.097  |
| H | 13.257 | -2.026 | 2.665  |
| C | 11.292 | -1.177 | 2.785  |
| H | 11.298 | -1.126 | 3.869  |
| C | 13.026 | 1.879  | -0.032 |
| H | 12.938 | 0.811  | -0.247 |
| H | 13.836 | 1.993  | 0.693  |
| N | 11.624 | 2.519  | 1.933  |
| H | 12.402 | 2.304  | 2.585  |
| C | 11.760 | 2.418  | 0.561  |
| C | 10.378 | 2.917  | 2.230  |
| H | 10.007 | 3.047  | 3.234  |
| N | 9.678  | 3.104  | 1.102  |
| C | 10.542 | 2.794  | 0.057  |
| H | 10.226 | 2.864  | -0.967 |
| C | 4.435  | 1.380  | -0.628 |
| C | 3.317  | -0.202 | -2.112 |
| H | 3.153  | -1.209 | -2.478 |
| C | 4.206  | 0.050  | -1.088 |
| H | 4.736  | -0.782 | -0.634 |
| C | 2.589  | 0.848  | -2.701 |
| O | 1.728  | 0.522  | -3.699 |
| H | 1.260  | 1.318  | -3.999 |

|    |       |        |        |
|----|-------|--------|--------|
| C  | 3.689 | 2.426  | -1.244 |
| H  | 3.803 | 3.437  | -0.875 |
| C  | 2.780 | 2.164  | -2.251 |
| H  | 2.202 | 2.976  | -2.680 |
| C  | 5.376 | 1.692  | 0.375  |
| O  | 5.704 | 2.996  | 0.659  |
| C  | 6.137 | 0.774  | 1.259  |
| H  | 6.182 | -0.271 | 0.943  |
| H  | 5.088 | 2.566  | 2.424  |
| O  | 7.511 | 1.303  | 1.215  |
| H  | 8.132 | 0.778  | 1.819  |
| O  | 5.733 | 0.737  | 2.606  |
| O  | 4.838 | 1.821  | 3.010  |
| Fe | 7.589 | 3.302  | 0.779  |

Model <sup>7</sup>A4'

E=-3130.494539 au ZPE=0.5650352558 au

|   |        |        |        |
|---|--------|--------|--------|
| C | 9.010  | 6.555  | -3.560 |
| H | 8.501  | 7.448  | -3.195 |
| H | 8.796  | 6.456  | -4.626 |
| N | 8.456  | 4.082  | -3.315 |
| H | 8.751  | 3.802  | -4.265 |
| C | 8.538  | 5.361  | -2.801 |
| C | 8.093  | 3.242  | -2.330 |
| H | 7.952  | 2.181  | -2.461 |
| N | 7.934  | 3.920  | -1.194 |
| C | 8.195  | 5.245  | -1.481 |
| H | 8.135  | 6.016  | -0.728 |
| C | 7.921  | 7.948  | 3.912  |
| H | 8.700  | 7.584  | 4.586  |
| H | 7.101  | 8.365  | 4.507  |
| N | 6.116  | 6.655  | 2.681  |
| H | 5.402  | 7.389  | 2.830  |
| C | 7.437  | 6.809  | 3.070  |
| C | 5.998  | 5.531  | 1.958  |
| H | 5.081  | 5.146  | 1.539  |
| N | 7.196  | 4.945  | 1.849  |
| C | 8.098  | 5.737  | 2.536  |
| H | 9.142  | 5.482  | 2.579  |
| C | 13.694 | -2.180 | -0.024 |
| H | 14.501 | -2.346 | 0.697  |
| H | 14.024 | -1.415 | -0.737 |
| C | 12.437 | -1.734 | 0.699  |
| C | 11.297 | -1.310 | -0.002 |

|    |        |        |        |
|----|--------|--------|--------|
| H  | 11.300 | -1.345 | -1.084 |
| C  | 10.175 | -0.815 | 0.653  |
| H  | 9.314  | -0.472 | 0.087  |
| C  | 10.179 | -0.720 | 2.044  |
| O  | 9.066  | -0.165 | 2.672  |
| H  | 9.349  | 0.278  | 3.512  |
| C  | 12.389 | -1.673 | 2.096  |
| H  | 13.243 | -2.018 | 2.672  |
| C  | 11.275 | -1.175 | 2.774  |
| H  | 11.273 | -1.121 | 3.858  |
| C  | 13.049 | 1.872  | -0.026 |
| H  | 12.969 | 0.804  | -0.247 |
| H  | 13.859 | 1.986  | 0.700  |
| N  | 11.639 | 2.508  | 1.938  |
| H  | 12.418 | 2.311  | 2.592  |
| C  | 11.777 | 2.397  | 0.568  |
| C  | 10.385 | 2.890  | 2.229  |
| H  | 10.010 | 3.025  | 3.232  |
| N  | 9.684  | 3.057  | 1.099  |
| C  | 10.555 | 2.749  | 0.060  |
| H  | 10.241 | 2.806  | -0.966 |
| C  | 4.435  | 1.345  | -0.801 |
| C  | 3.233  | -0.255 | -2.200 |
| H  | 3.045  | -1.268 | -2.536 |
| C  | 4.158  | 0.006  | -1.211 |
| H  | 4.681  | -0.827 | -0.752 |
| C  | 2.508  | 0.790  | -2.799 |
| O  | 1.610  | 0.450  | -3.757 |
| H  | 1.152  | 1.247  | -4.068 |
| C  | 3.687  | 2.389  | -1.426 |
| H  | 3.845  | 3.409  | -1.102 |
| C  | 2.738  | 2.115  | -2.393 |
| H  | 2.165  | 2.925  | -2.833 |
| C  | 5.418  | 1.668  | 0.164  |
| O  | 5.768  | 2.960  | 0.376  |
| C  | 6.181  | 0.694  | 1.003  |
| H  | 6.274  | -0.303 | 0.559  |
| H  | 4.321  | 1.607  | 2.853  |
| O  | 7.507  | 1.268  | 1.137  |
| H  | 8.094  | 0.733  | 1.765  |
| O  | 5.652  | 0.405  | 2.266  |
| O  | 5.291  | 1.638  | 2.948  |
| Fe | 7.594  | 3.280  | 0.740  |

Model 'TS4'

E=-3130.488138 au ZPE=0.5642942460 au

|   |        |        |        |
|---|--------|--------|--------|
| C | 8.990  | 6.533  | -3.521 |
| H | 8.481  | 7.427  | -3.157 |
| H | 8.773  | 6.432  | -4.587 |
| N | 8.436  | 4.061  | -3.269 |
| H | 8.735  | 3.779  | -4.217 |
| C | 8.522  | 5.340  | -2.757 |
| C | 8.064  | 3.224  | -2.285 |
| H | 7.922  | 2.162  | -2.414 |
| N | 7.904  | 3.905  | -1.150 |
| C | 8.173  | 5.227  | -1.438 |
| H | 8.115  | 6.000  | -0.687 |
| C | 7.877  | 7.918  | 3.907  |
| H | 8.653  | 7.538  | 4.576  |
| H | 7.061  | 8.334  | 4.506  |
| N | 6.075  | 6.689  | 2.608  |
| H | 5.375  | 7.439  | 2.750  |
| C | 7.384  | 6.797  | 3.045  |
| C | 5.947  | 5.575  | 1.870  |
| H | 5.033  | 5.233  | 1.407  |
| N | 7.127  | 4.947  | 1.802  |
| C | 8.027  | 5.705  | 2.528  |
| H | 9.060  | 5.415  | 2.608  |
| C | 13.763 | -2.230 | -0.017 |
| H | 14.552 | -2.419 | 0.717  |
| H | 14.114 | -1.458 | -0.713 |
| C | 12.493 | -1.780 | 0.679  |
| C | 11.368 | -1.376 | -0.056 |
| H | 11.399 | -1.431 | -1.135 |
| C | 10.225 | -0.884 | 0.561  |
| H | 9.377  | -0.561 | -0.033 |
| C | 10.195 | -0.764 | 1.950  |
| O | 9.061  | -0.200 | 2.526  |
| H | 9.305  | 0.234  | 3.383  |
| C | 12.411 | -1.699 | 2.073  |
| H | 13.252 | -2.029 | 2.676  |
| C | 11.275 | -1.198 | 2.715  |
| H | 11.247 | -1.129 | 3.797  |
| C | 12.996 | 1.849  | 0.008  |
| H | 12.916 | 0.781  | -0.213 |
| H | 13.804 | 1.964  | 0.736  |
| N | 11.591 | 2.503  | 1.971  |
| H | 12.379 | 2.326  | 2.621  |

|    |        |        |        |   |        |        |        |
|----|--------|--------|--------|---|--------|--------|--------|
| C  | 11.721 | 2.368  | 0.601  | H | 8.549  | 7.671  | 4.586  |
| C  | 10.332 | 2.862  | 2.266  | H | 6.975  | 8.414  | 4.427  |
| H  | 9.962  | 3.006  | 3.269  | N | 6.059  | 6.700  | 2.610  |
| N  | 9.617  | 2.991  | 1.139  | H | 5.326  | 7.416  | 2.745  |
| C  | 10.487 | 2.681  | 0.098  | C | 7.365  | 6.884  | 3.023  |
| H  | 10.167 | 2.706  | -0.927 | C | 5.988  | 5.568  | 1.881  |
| C  | 4.376  | 1.255  | -0.821 | H | 5.078  | 5.164  | 1.464  |
| C  | 3.215  | -0.359 | -2.233 | N | 7.194  | 5.011  | 1.793  |
| H  | 3.055  | -1.373 | -2.581 | C | 8.058  | 5.827  | 2.495  |
| C  | 4.133  | -0.084 | -1.241 | H | 9.109  | 5.600  | 2.551  |
| H  | 4.689  | -0.904 | -0.798 | C | 13.871 | -2.278 | -0.023 |
| C  | 2.468  | 0.676  | -2.823 | H | 14.629 | -2.472 | 0.707  |
| O  | 1.574  | 0.326  | -3.781 | H | 14.206 | -1.511 | -0.689 |
| H  | 1.114  | 1.120  | -4.096 | C | 12.603 | -1.824 | 0.673  |
| C  | 3.613  | 2.290  | -1.443 | C | 11.496 | -1.386 | -0.067 |
| H  | 3.760  | 3.311  | -1.116 | H | 11.550 | -1.388 | -1.147 |
| C  | 2.674  | 2.003  | -2.414 | C | 10.336 | -0.936 | 0.546  |
| H  | 2.089  | 2.806  | -2.853 | H | 9.504  | -0.589 | -0.054 |
| C  | 5.355  | 1.600  | 0.139  | C | 10.264 | -0.893 | 1.939  |
| O  | 5.703  | 2.902  | 0.315  | O | 9.098  | -0.402 | 2.513  |
| C  | 6.181  | 0.693  | 0.979  | H | 9.301  | 0.018  | 3.387  |
| H  | 6.046  | -0.375 | 0.788  | C | 12.494 | -1.802 | 2.067  |
| H  | 5.392  | 2.546  | 2.804  | H | 13.327 | -2.152 | 2.670  |
| O  | 7.551  | 1.094  | 0.773  | C | 11.338 | -1.345 | 2.705  |
| H  | 8.138  | 0.647  | 1.464  | H | 11.284 | -1.331 | 3.789  |
| O  | 5.937  | 0.776  | 2.387  | C | 13.204 | 1.840  | -0.006 |
| O  | 6.265  | 2.116  | 2.848  | H | 13.081 | 0.798  | -0.218 |
| Fe | 7.526  | 3.212  | 0.765  | H | 14.046 | 1.975  | 0.641  |

Model 7A5

E=-3130.579169 au ZPE=0.5594894907 au

|   |       |       |        |   |        |        |        |
|---|-------|-------|--------|---|--------|--------|--------|
| C | 8.859 | 6.289 | -3.348 | C | 10.661 | 2.781  | 2.411  |
| H | 8.337 | 7.147 | -2.980 | H | 10.325 | 2.869  | 3.433  |
| H | 8.598 | 6.125 | -4.373 | N | 9.913  | 3.006  | 1.321  |
| N | 8.549 | 3.785 | -2.988 | C | 10.732 | 2.752  | 0.230  |
| H | 8.874 | 3.499 | -3.924 | H | 10.373 | 2.865  | -0.775 |
| C | 8.479 | 5.089 | -2.538 | C | 4.321  | 1.286  | -0.739 |
| C | 8.231 | 2.966 | -1.963 | C | 3.020  | -0.160 | -2.178 |
| H | 8.254 | 1.890 | -2.041 | H | 2.837  | -1.116 | -2.653 |
| N | 7.943 | 3.667 | -0.866 | C | 4.090  | 0.025  | -1.335 |
| C | 8.085 | 4.994 | -1.228 | H | 4.735  | -0.809 | -1.091 |
| H | 7.916 | 5.793 | -0.524 | C | 2.128  | 0.901  | -2.421 |
| C | 7.814 | 8.021 | 3.891  | O | 1.092  | 0.638  | -3.229 |
|   |       |       |        | H | 0.580  | 1.445  | -3.404 |

|    |       |        |        |
|----|-------|--------|--------|
| C  | 3.424 | 2.348  | -1.000 |
| H  | 3.582 | 3.308  | -0.524 |
| C  | 2.336 | 2.160  | -1.827 |
| H  | 1.628 | 2.967  | -1.991 |
| C  | 5.474 | 1.533  | 0.076  |
| O  | 5.734 | 2.572  | 0.683  |
| C  | 6.641 | 0.395  | 0.117  |
| H  | 6.867 | 0.233  | -0.958 |
| H  | 7.890 | 3.083  | 3.770  |
| O  | 7.783 | 0.991  | 0.713  |
| H  | 8.160 | 0.429  | 1.469  |
| O  | 6.178 | -0.679 | 0.693  |
| O  | 7.650 | 2.483  | 3.049  |
| Fe | 7.809 | 3.036  | 1.301  |

Model <sup>7</sup>TS5

E=-3130.552424 au ZPE=0.5578039390 au

|   |        |        |        |
|---|--------|--------|--------|
| C | 8.861  | 6.304  | -3.353 |
| H | 8.342  | 7.166  | -2.990 |
| H | 8.604  | 6.139  | -4.378 |
| N | 8.526  | 3.803  | -2.991 |
| H | 8.852  | 3.513  | -3.925 |
| C | 8.471  | 5.108  | -2.542 |
| C | 8.194  | 2.989  | -1.966 |
| H | 8.196  | 1.913  | -2.043 |
| N | 7.915  | 3.694  | -0.871 |
| C | 8.075  | 5.018  | -1.232 |
| H | 7.915  | 5.820  | -0.528 |
| C | 7.817  | 8.039  | 3.900  |
| H | 8.553  | 7.689  | 4.594  |
| H | 6.981  | 8.437  | 4.437  |
| N | 6.052  | 6.715  | 2.636  |
| H | 5.320  | 7.432  | 2.772  |
| C | 7.361  | 6.900  | 3.038  |
| C | 5.974  | 5.580  | 1.912  |
| H | 5.062  | 5.171  | 1.504  |
| N | 7.180  | 5.026  | 1.817  |
| C | 8.051  | 5.842  | 2.510  |
| H | 9.101  | 5.613  | 2.558  |
| C | 13.897 | -2.295 | -0.004 |
| H | 14.643 | -2.501 | 0.735  |
| H | 14.248 | -1.527 | -0.661 |
| C | 12.625 | -1.833 | 0.678  |
| C | 11.535 | -1.388 | -0.083 |

|    |        |        |        |
|----|--------|--------|--------|
| H  | 11.608 | -1.392 | -1.161 |
| C  | 10.368 | -0.929 | 0.507  |
| H  | 9.555  | -0.571 | -0.111 |
| C  | 10.273 | -0.882 | 1.897  |
| O  | 9.096  | -0.376 | 2.450  |
| H  | 9.285  | 0.052  | 3.325  |
| C  | 12.492 | -1.808 | 2.069  |
| H  | 13.312 | -2.162 | 2.688  |
| C  | 11.327 | -1.341 | 2.686  |
| H  | 11.255 | -1.323 | 3.768  |
| C  | 13.182 | 1.852  | -0.011 |
| H  | 13.061 | 0.809  | -0.219 |
| H  | 14.020 | 1.991  | 0.640  |
| N  | 11.860 | 2.412  | 2.029  |
| H  | 12.668 | 2.196  | 2.642  |
| C  | 11.944 | 2.377  | 0.649  |
| C  | 10.624 | 2.787  | 2.390  |
| H  | 10.287 | 2.867  | 3.412  |
| N  | 9.882  | 3.024  | 1.300  |
| C  | 10.709 | 2.777  | 0.212  |
| H  | 10.357 | 2.903  | -0.795 |
| C  | 4.358  | 1.282  | -0.696 |
| C  | 3.047  | -0.147 | -2.145 |
| H  | 2.837  | -1.107 | -2.602 |
| C  | 4.080  | 0.011  | -1.252 |
| H  | 4.665  | -0.850 | -0.955 |
| C  | 2.216  | 0.948  | -2.455 |
| O  | 1.190  | 0.702  | -3.279 |
| H  | 0.699  | 1.519  | -3.477 |
| C  | 3.545  | 2.381  | -1.047 |
| H  | 3.734  | 3.344  | -0.590 |
| C  | 2.471  | 2.217  | -1.899 |
| H  | 1.806  | 3.050  | -2.106 |
| C  | 5.465  | 1.481  | 0.222  |
| O  | 5.761  | 2.577  | 0.779  |
| C  | 6.712  | 0.415  | 0.154  |
| H  | 6.813  | -0.195 | -0.749 |
| H  | 7.944  | 3.032  | 3.760  |
| O  | 7.892  | 0.944  | 0.602  |
| H  | 8.273  | 0.447  | 1.424  |
| O  | 5.748  | 0.127  | 1.041  |
| O  | 7.669  | 2.454  | 3.034  |
| Fe | 7.743  | 3.064  | 1.296  |

Model <sup>7</sup>A6

E=-3130.591978 au ZPE=0.5635345707 au

|   |        |        |        |
|---|--------|--------|--------|
| C | 8.837  | 6.239  | -3.310 |
| H | 8.312  | 7.096  | -2.942 |
| H | 8.577  | 6.074  | -4.335 |
| N | 8.473  | 3.736  | -2.967 |
| H | 8.786  | 3.453  | -3.906 |
| C | 8.461  | 5.037  | -2.500 |
| C | 8.135  | 2.917  | -1.946 |
| H | 8.084  | 1.842  | -2.038 |
| N | 7.896  | 3.617  | -0.837 |
| C | 8.089  | 4.941  | -1.184 |
| H | 7.962  | 5.737  | -0.469 |
| C | 7.776  | 7.991  | 3.894  |
| H | 8.510  | 7.636  | 4.587  |
| H | 6.939  | 8.384  | 4.432  |
| N | 6.018  | 6.691  | 2.595  |
| H | 5.291  | 7.414  | 2.723  |
| C | 7.322  | 6.858  | 3.022  |
| C | 5.939  | 5.556  | 1.869  |
| H | 5.028  | 5.164  | 1.443  |
| N | 7.138  | 4.982  | 1.798  |
| C | 8.005  | 5.788  | 2.508  |
| H | 9.052  | 5.547  | 2.579  |
| C | 14.058 | -2.397 | -0.059 |
| H | 14.842 | -2.627 | 0.632  |
| H | 14.384 | -1.625 | -0.724 |
| C | 12.838 | -1.926 | 0.702  |
| C | 11.686 | -1.508 | 0.019  |
| H | 11.662 | -1.561 | -1.062 |
| C | 10.576 | -1.022 | 0.692  |
| H | 9.704  | -0.696 | 0.138  |
| C | 10.614 | -0.918 | 2.082  |
| O | 9.497  | -0.379 | 2.710  |
| H | 9.729  | 0.001  | 3.598  |
| C | 12.827 | -1.854 | 2.098  |
| H | 13.692 | -2.202 | 2.657  |
| C | 11.728 | -1.348 | 2.795  |
| H | 11.744 | -1.277 | 3.877  |
| C | 13.173 | 1.826  | 0.008  |
| H | 13.054 | 0.784  | -0.205 |
| H | 14.008 | 1.963  | 0.664  |
| N | 11.871 | 2.479  | 2.040  |
| H | 12.694 | 2.320  | 2.650  |

|    |        |        |        |
|----|--------|--------|--------|
| C  | 11.931 | 2.347  | 0.665  |
| C  | 10.628 | 2.834  | 2.399  |
| H  | 10.301 | 2.973  | 3.418  |
| N  | 9.860  | 2.965  | 1.308  |
| C  | 10.673 | 2.668  | 0.225  |
| H  | 10.299 | 2.703  | -0.781 |
| C  | 4.271  | 1.293  | -0.823 |
| C  | 2.940  | -0.030 | -2.345 |
| H  | 2.687  | -0.968 | -2.825 |
| C  | 3.943  | 0.052  | -1.409 |
| H  | 4.480  | -0.838 | -1.115 |
| C  | 2.219  | 1.122  | -2.695 |
| O  | 1.247  | 0.944  | -3.603 |
| H  | 0.808  | 1.784  | -3.817 |
| C  | 3.547  | 2.444  | -1.182 |
| H  | 3.773  | 3.390  | -0.705 |
| C  | 2.521  | 2.362  | -2.108 |
| H  | 1.938  | 3.243  | -2.359 |
| C  | 5.352  | 1.365  | 0.133  |
| O  | 5.781  | 2.395  | 0.684  |
| C  | 6.925  | -0.015 | 1.246  |
| H  | 7.140  | -1.064 | 1.429  |
| H  | 7.848  | 3.196  | 3.781  |
| O  | 8.001  | 0.801  | 1.036  |
| H  | 8.682  | 0.505  | 1.736  |
| O  | 5.902  | 0.149  | 0.360  |
| O  | 7.654  | 2.535  | 3.100  |
| Fe | 7.718  | 2.986  | 1.314  |

Model <sup>7</sup>TS6

E=-3130.552424 au ZPE=0.5622632074 au

|   |       |       |        |
|---|-------|-------|--------|
| C | 8.882 | 6.311 | -3.382 |
| H | 8.356 | 7.169 | -3.019 |
| H | 8.633 | 6.148 | -4.410 |
| N | 8.500 | 3.810 | -3.043 |
| H | 8.802 | 3.522 | -3.986 |
| C | 8.493 | 5.112 | -2.579 |
| C | 8.181 | 2.990 | -2.020 |
| H | 8.128 | 1.915 | -2.102 |
| N | 7.964 | 3.696 | -0.912 |
| C | 8.142 | 5.020 | -1.258 |
| H | 8.025 | 5.816 | -0.540 |
| C | 7.806 | 8.014 | 3.911  |
| H | 8.542 | 7.669 | 4.607  |

|   |        |        |        |
|---|--------|--------|--------|
| H | 6.968  | 8.411  | 4.445  |
| N | 6.051  | 6.695  | 2.627  |
| H | 5.321  | 7.417  | 2.753  |
| C | 7.356  | 6.871  | 3.053  |
| C | 5.972  | 5.558  | 1.911  |
| H | 5.068  | 5.159  | 1.476  |
| N | 7.177  | 4.989  | 1.844  |
| C | 8.045  | 5.803  | 2.546  |
| H | 9.092  | 5.565  | 2.613  |
| C | 14.042 | -2.397 | -0.076 |
| H | 14.817 | -2.623 | 0.626  |
| H | 14.377 | -1.629 | -0.742 |
| C | 12.812 | -1.920 | 0.666  |
| C | 11.661 | -1.524 | -0.032 |
| H | 11.645 | -1.601 | -1.111 |
| C | 10.545 | -1.031 | 0.623  |
| H | 9.664  | -0.736 | 0.061  |
| C | 10.573 | -0.891 | 2.010  |
| O | 9.462  | -0.319 | 2.603  |
| H | 9.693  | 0.056  | 3.490  |
| C | 12.790 | -1.823 | 2.060  |
| H | 13.652 | -2.157 | 2.632  |
| C | 11.684 | -1.307 | 2.739  |
| H | 11.696 | -1.217 | 3.820  |
| C | 13.136 | 1.839  | 0.026  |
| H | 12.997 | 0.799  | -0.184 |
| H | 13.972 | 1.961  | 0.683  |
| N | 11.814 | 2.460  | 2.058  |
| H | 12.621 | 2.251  | 2.675  |
| C | 11.902 | 2.387  | 0.679  |
| C | 10.579 | 2.852  | 2.407  |
| H | 10.238 | 2.959  | 3.426  |
| N | 9.843  | 3.066  | 1.306  |
| C | 10.672 | 2.782  | 0.227  |
| H | 10.327 | 2.882  | -0.784 |
| C | 4.208  | 1.371  | -0.724 |
| C | 3.071  | -0.164 | -2.204 |
| H | 2.914  | -1.156 | -2.609 |
| C | 3.985  | 0.063  | -1.195 |
| H | 4.555  | -0.759 | -0.779 |
| C | 2.325  | 0.905  | -2.723 |
| O | 1.432  | 0.606  | -3.690 |
| H | 0.973  | 1.411  | -3.980 |
| C | 3.477  | 2.441  | -1.268 |

|    |       |        |        |
|----|-------|--------|--------|
| H  | 3.631 | 3.443  | -0.888 |
| C  | 2.527 | 2.210  | -2.247 |
| H  | 1.933 | 3.032  | -2.634 |
| C  | 5.233 | 1.621  | 0.266  |
| O  | 5.763 | 2.746  | 0.450  |
| C  | 6.791 | 0.718  | 1.737  |
| H  | 6.915 | -0.147 | 2.375  |
| H  | 7.387 | 2.670  | 3.590  |
| O  | 7.878 | 0.925  | 0.858  |
| H  | 8.656 | 0.627  | 1.401  |
| O  | 5.643 | 0.542  | 0.942  |
| O  | 7.348 | 2.138  | 2.762  |
| Fe | 7.716 | 3.104  | 1.151  |

Model <sup>7</sup>A7

E=-3130.552424 au ZPE=0.5692427303 au

|   |        |        |        |
|---|--------|--------|--------|
| C | 8.923  | 6.442  | -3.481 |
| H | 8.416  | 7.302  | -3.096 |
| H | 8.690  | 6.326  | -4.519 |
| N | 8.433  | 3.957  | -3.270 |
| H | 8.746  | 3.700  | -4.218 |
| C | 8.481  | 5.227  | -2.733 |
| C | 8.073  | 3.095  | -2.296 |
| H | 7.973  | 2.031  | -2.449 |
| N | 7.878  | 3.744  | -1.152 |
| C | 8.117  | 5.077  | -1.420 |
| H | 8.028  | 5.832  | -0.654 |
| C | 7.863  | 7.878  | 3.930  |
| H | 8.632  | 7.531  | 4.588  |
| H | 7.050  | 8.267  | 4.506  |
| N | 6.071  | 6.614  | 2.648  |
| H | 5.368  | 7.360  | 2.765  |
| C | 7.377  | 6.739  | 3.085  |
| C | 5.966  | 5.481  | 1.922  |
| H | 5.052  | 5.126  | 1.471  |
| N | 7.143  | 4.862  | 1.861  |
| C | 8.026  | 5.642  | 2.581  |
| H | 9.063  | 5.370  | 2.665  |
| C | 13.651 | -2.160 | -0.033 |
| H | 14.463 | -2.304 | 0.649  |
| H | 13.909 | -1.399 | -0.739 |
| C | 12.412 | -1.737 | 0.737  |
| C | 11.236 | -1.321 | 0.092  |
| H | 11.189 | -1.350 | -0.990 |



|    |        |        |        |
|----|--------|--------|--------|
| C  | 10.140 | -0.838 | 0.805  |
| H  | 9.247  | -0.504 | 0.286  |
| C  | 10.216 | -0.747 | 2.193  |
| O  | 9.139  | -0.199 | 2.897  |
| H  | 9.491  | 0.277  | 3.696  |
| C  | 12.430 | -1.684 | 2.136  |
| H  | 13.311 | -2.027 | 2.670  |
| C  | 11.347 | -1.196 | 2.868  |
| H  | 11.396 | -1.139 | 3.951  |
| C  | 13.029 | 1.867  | -0.020 |
| H  | 12.927 | 0.825  | -0.241 |
| H  | 13.818 | 2.006  | 0.689  |
| N  | 11.598 | 2.539  | 1.916  |
| H  | 12.374 | 2.375  | 2.581  |
| C  | 11.744 | 2.384  | 0.554  |
| C  | 10.328 | 2.898  | 2.187  |
| H  | 9.939  | 3.053  | 3.180  |
| N  | 9.631  | 3.002  | 1.051  |
| C  | 10.513 | 2.686  | 0.029  |
| H  | 10.203 | 2.699  | -0.999 |
| C  | 4.203  | 1.468  | -0.935 |
| C  | 3.081  | -0.139 | -2.350 |
| H  | 2.877  | -1.155 | -2.664 |
| C  | 3.919  | 0.134  | -1.288 |
| H  | 4.379  | -0.675 | -0.735 |
| C  | 2.476  | 0.916  | -3.048 |
| O  | 1.668  | 0.576  | -4.073 |
| H  | 1.247  | 1.369  | -4.442 |
| C  | 3.606  | 2.520  | -1.650 |
| H  | 3.814  | 3.544  | -1.364 |
| C  | 2.733  | 2.249  | -2.689 |
| H  | 2.257  | 3.060  | -3.228 |
| C  | 5.164  | 1.760  | 0.115  |
| O  | 5.669  | 2.879  | 0.304  |
| C  | 6.171  | 0.852  | 2.102  |
| H  | 6.319  | -0.175 | 2.447  |
| H  | 4.506  | 1.304  | 2.950  |
| O  | 7.414  | 1.456  | 1.931  |
| H  | 8.156  | 0.839  | 2.232  |
| O  | 5.515  | 0.671  | 0.833  |
| O  | 5.421  | 1.632  | 2.942  |
| Fe | 7.648  | 3.131  | 0.792  |

Model 7TS7

E=-3130.573979 au ZPE=0.5682478973 au

|   |        |        |        |
|---|--------|--------|--------|
| C | 8.971  | 6.498  | -3.518 |
| H | 8.457  | 7.389  | -3.154 |
| H | 8.753  | 6.397  | -4.583 |
| N | 8.417  | 4.025  | -3.270 |
| H | 8.716  | 3.747  | -4.219 |
| C | 8.508  | 5.302  | -2.754 |
| C | 8.039  | 3.189  | -2.285 |
| H | 7.885  | 2.129  | -2.421 |
| N | 7.881  | 3.864  | -1.148 |
| C | 8.158  | 5.184  | -1.435 |
| H | 8.101  | 5.957  | -0.684 |
| C | 7.856  | 7.921  | 3.915  |
| H | 8.631  | 7.546  | 4.588  |
| H | 7.041  | 8.344  | 4.510  |
| N | 6.055  | 6.676  | 2.626  |
| H | 5.355  | 7.428  | 2.755  |
| C | 7.363  | 6.790  | 3.066  |
| C | 5.929  | 5.548  | 1.905  |
| H | 5.015  | 5.197  | 1.449  |
| N | 7.109  | 4.920  | 1.851  |
| C | 8.006  | 5.690  | 2.568  |
| H | 9.039  | 5.402  | 2.656  |
| C | 13.662 | -2.168 | -0.045 |
| H | 14.503 | -2.304 | 0.641  |
| H | 13.942 | -1.403 | -0.778 |
| C | 12.431 | -1.749 | 0.738  |
| C | 11.241 | -1.348 | 0.108  |
| H | 11.176 | -1.388 | -0.973 |
| C | 10.151 | -0.872 | 0.835  |
| H | 9.241  | -0.560 | 0.331  |
| C | 10.249 | -0.770 | 2.222  |
| O | 9.181  | -0.225 | 2.935  |
| H | 9.537  | 0.213  | 3.752  |
| C | 12.469 | -1.690 | 2.136  |
| H | 13.360 | -2.026 | 2.658  |
| C | 11.395 | -1.206 | 2.882  |
| H | 11.457 | -1.146 | 3.963  |
| C | 13.049 | 1.841  | -0.037 |
| H | 12.992 | 0.775  | -0.272 |
| H | 13.851 | 1.964  | 0.695  |
| N | 11.632 | 2.476  | 1.919  |
| H | 12.419 | 2.315  | 2.574  |

|                                       |        |        |        |   |        |        |        |
|---------------------------------------|--------|--------|--------|---|--------|--------|--------|
| C                                     | 11.763 | 2.336  | 0.551  | H | 7.048  | 8.343  | 4.504  |
| C                                     | 10.366 | 2.819  | 2.209  | N | 6.075  | 6.669  | 2.621  |
| H                                     | 9.994  | 2.968  | 3.211  | H | 5.370  | 7.416  | 2.751  |
| N                                     | 9.651  | 2.929  | 1.082  | C | 7.383  | 6.790  | 3.062  |
| C                                     | 10.523 | 2.630  | 0.045  | C | 5.956  | 5.544  | 1.898  |
| H                                     | 10.199 | 2.650  | -0.980 | H | 5.045  | 5.188  | 1.442  |
| C                                     | 4.310  | 1.322  | -0.870 | N | 7.141  | 4.924  | 1.842  |
| C                                     | 3.124  | -0.235 | -2.321 | C | 8.034  | 5.695  | 2.563  |
| H                                     | 2.900  | -1.238 | -2.668 | H | 9.068  | 5.414  | 2.651  |
| C                                     | 3.992  | -0.017 | -1.284 | C | 13.678 | -2.175 | -0.047 |
| H                                     | 4.466  | -0.847 | -0.774 | H | 14.518 | -2.317 | 0.640  |
| C                                     | 2.497  | 0.851  | -2.976 | H | 13.962 | -1.410 | -0.779 |
| O                                     | 1.658  | 0.544  | -3.996 | C | 12.449 | -1.750 | 0.735  |
| H                                     | 1.233  | 1.353  | -4.324 | C | 11.258 | -1.354 | 0.104  |
| C                                     | 3.660  | 2.413  | -1.548 | H | 11.191 | -1.401 | -0.976 |
| H                                     | 3.852  | 3.425  | -1.216 | C | 10.168 | -0.875 | 0.830  |
| C                                     | 2.768  | 2.174  | -2.568 | H | 9.257  | -0.567 | 0.325  |
| H                                     | 2.268  | 3.004  | -3.057 | C | 10.267 | -0.767 | 2.216  |
| C                                     | 5.254  | 1.560  | 0.125  | O | 9.199  | -0.218 | 2.924  |
| O                                     | 5.758  | 2.764  | 0.387  | H | 9.550  | 0.224  | 3.741  |
| C                                     | 6.247  | 0.690  | 2.074  | C | 12.489 | -1.683 | 2.133  |
| H                                     | 6.526  | -0.294 | 2.457  | H | 13.381 | -2.016 | 2.656  |
| H                                     | 5.600  | 2.084  | 3.229  | C | 11.414 | -1.197 | 2.877  |
| O                                     | 7.429  | 1.520  | 2.110  | H | 11.478 | -1.132 | 3.958  |
| H                                     | 8.211  | 0.927  | 2.323  | C | 13.070 | 1.845  | -0.039 |
| O                                     | 5.861  | 0.478  | 0.747  | H | 13.007 | 0.778  | -0.273 |
| O                                     | 5.252  | 1.286  | 2.814  | H | 13.874 | 1.964  | 0.691  |
| Fe                                    | 7.552  | 3.201  | 0.820  | N | 11.655 | 2.484  | 1.920  |
|                                       |        |        |        | H | 12.441 | 2.317  | 2.575  |
|                                       |        |        |        | C | 11.787 | 2.347  | 0.552  |
|                                       |        |        |        | C | 10.393 | 2.838  | 2.211  |
|                                       |        |        |        | H | 10.020 | 2.983  | 3.213  |
|                                       |        |        |        | N | 9.681  | 2.960  | 1.081  |
|                                       |        |        |        | C | 10.552 | 2.655  | 0.044  |
|                                       |        |        |        | H | 10.228 | 2.680  | -0.980 |
|                                       |        |        |        | C | 4.372  | 1.309  | -0.938 |
|                                       |        |        |        | C | 3.147  | -0.257 | -2.342 |
|                                       |        |        |        | H | 2.918  | -1.263 | -2.674 |
|                                       |        |        |        | C | 4.055  | -0.029 | -1.337 |
|                                       |        |        |        | H | 4.547  | -0.856 | -0.841 |
|                                       |        |        |        | C | 2.489  | 0.818  | -2.973 |
|                                       |        |        |        | O | 1.604  | 0.501  | -3.953 |
|                                       |        |        |        | H | 1.170  | 1.309  | -4.271 |
|                                       |        |        |        | C | 3.703  | 2.389  | -1.599 |
| Model 7A8                             |        |        |        |   |        |        |        |
| E=-3130.583522 au ZPE=0.5682400269 au |        |        |        |   |        |        |        |
| C                                     | 8.978  | 6.488  | -3.506 |   |        |        |        |
| H                                     | 8.462  | 7.377  | -3.139 |   |        |        |        |
| H                                     | 8.755  | 6.386  | -4.570 |   |        |        |        |
| N                                     | 8.433  | 4.012  | -3.258 |   |        |        |        |
| H                                     | 8.724  | 3.736  | -4.209 |   |        |        |        |
| C                                     | 8.526  | 5.289  | -2.740 |   |        |        |        |
| C                                     | 8.064  | 3.173  | -2.272 |   |        |        |        |
| H                                     | 7.908  | 2.113  | -2.409 |   |        |        |        |
| N                                     | 7.913  | 3.847  | -1.132 |   |        |        |        |
| C                                     | 8.188  | 5.169  | -1.419 |   |        |        |        |
| H                                     | 8.136  | 5.940  | -0.666 |   |        |        |        |
| C                                     | 7.868  | 7.923  | 3.913  |   |        |        |        |
| H                                     | 8.641  | 7.551  | 4.589  |   |        |        |        |

|    |       |        |        |
|----|-------|--------|--------|
| H  | 3.905 | 3.405  | -1.282 |
| C  | 2.773 | 2.142  | -2.587 |
| H  | 2.255 | 2.968  | -3.063 |
| C  | 5.314 | 1.551  | 0.062  |
| O  | 5.783 | 2.769  | 0.386  |
| C  | 6.273 | 0.711  | 2.031  |
| H  | 6.559 | -0.248 | 2.461  |
| H  | 4.810 | 1.940  | 2.280  |
| O  | 7.482 | 1.535  | 2.041  |
| H  | 8.255 | 0.942  | 2.283  |
| O  | 5.929 | 0.475  | 0.695  |
| O  | 5.303 | 1.284  | 2.799  |
| Fe | 7.578 | 3.203  | 0.836  |

Model <sup>7</sup>TSS

E=-3130.549051 au ZPE=0.5638701460 au

|   |        |        |        |
|---|--------|--------|--------|
| C | 8.940  | 6.440  | -3.488 |
| H | 8.418  | 7.328  | -3.127 |
| H | 8.721  | 6.333  | -4.553 |
| N | 8.424  | 3.958  | -3.226 |
| H | 8.730  | 3.679  | -4.173 |
| C | 8.491  | 5.241  | -2.719 |
| C | 8.050  | 3.121  | -2.241 |
| H | 7.912  | 2.057  | -2.364 |
| N | 7.866  | 3.804  | -1.110 |
| C | 8.127  | 5.130  | -1.404 |
| H | 8.047  | 5.908  | -0.661 |
| C | 7.866  | 7.931  | 3.922  |
| H | 8.637  | 7.566  | 4.604  |
| H | 7.038  | 8.346  | 4.506  |
| N | 6.094  | 6.668  | 2.612  |
| H | 5.385  | 7.411  | 2.740  |
| C | 7.396  | 6.792  | 3.067  |
| C | 5.985  | 5.545  | 1.885  |
| H | 5.078  | 5.189  | 1.420  |
| N | 7.173  | 4.926  | 1.839  |
| C | 8.056  | 5.700  | 2.571  |
| H | 9.091  | 5.423  | 2.669  |
| C | 13.651 | -2.168 | -0.063 |
| H | 14.497 | -2.295 | 0.620  |
| H | 13.923 | -1.404 | -0.801 |
| C | 12.422 | -1.751 | 0.726  |
| C | 11.225 | -1.361 | 0.103  |
| H | 11.153 | -1.407 | -0.977 |

|    |        |        |        |
|----|--------|--------|--------|
| C  | 10.135 | -0.888 | 0.834  |
| H  | 9.217  | -0.587 | 0.337  |
| C  | 10.244 | -0.779 | 2.219  |
| O  | 9.179  | -0.231 | 2.938  |
| H  | 9.539  | 0.169  | 3.772  |
| C  | 12.469 | -1.687 | 2.124  |
| H  | 13.365 | -2.016 | 2.642  |
| C  | 11.396 | -1.207 | 2.874  |
| H  | 11.468 | -1.143 | 3.955  |
| C  | 13.068 | 1.818  | -0.037 |
| H  | 13.017 | 0.752  | -0.278 |
| H  | 13.873 | 1.942  | 0.692  |
| N  | 11.656 | 2.466  | 1.924  |
| H  | 12.451 | 2.325  | 2.575  |
| C  | 11.780 | 2.300  | 0.557  |
| C  | 10.389 | 2.794  | 2.220  |
| H  | 10.026 | 2.962  | 3.224  |
| N  | 9.661  | 2.870  | 1.093  |
| C  | 10.532 | 2.563  | 0.055  |
| H  | 10.199 | 2.551  | -0.967 |
| C  | 4.452  | 1.310  | -0.929 |
| C  | 3.269  | -0.258 | -2.369 |
| H  | 3.109  | -1.254 | -2.768 |
| C  | 4.242  | -0.009 | -1.424 |
| H  | 4.877  | -0.808 | -1.058 |
| C  | 2.435  | 0.783  | -2.826 |
| O  | 1.486  | 0.455  | -3.739 |
| H  | 0.981  | 1.247  | -3.984 |
| C  | 3.596  | 2.348  | -1.402 |
| H  | 3.715  | 3.352  | -1.016 |
| C  | 2.606  | 2.086  | -2.330 |
| H  | 1.954  | 2.886  | -2.667 |
| C  | 5.555  | 1.595  | -0.087 |
| O  | 5.690  | 2.844  | 0.504  |
| C  | 6.338  | 0.877  | 2.248  |
| H  | 6.434  | -0.162 | 2.538  |
| H  | 5.202  | 2.268  | 1.773  |
| O  | 7.459  | 1.647  | 2.429  |
| H  | 8.241  | 1.008  | 2.459  |
| O  | 6.476  | 0.758  | 0.314  |
| O  | 5.194  | 1.478  | 2.441  |
| Fe | 7.572  | 3.164  | 0.850  |

Model 7P

E=-3130.608265 au ZPE=0.5670300877 au

|   |        |        |        |
|---|--------|--------|--------|
| C | 8.982  | 6.558  | -3.546 |
| H | 8.490  | 7.463  | -3.188 |
| H | 8.770  | 6.461  | -4.613 |
| N | 8.355  | 4.105  | -3.312 |
| H | 8.666  | 3.818  | -4.254 |
| C | 8.474  | 5.380  | -2.787 |
| C | 7.916  | 3.281  | -2.348 |
| H | 7.718  | 2.228  | -2.472 |
| N | 7.745  | 3.963  | -1.210 |
| C | 8.081  | 5.274  | -1.481 |
| H | 8.028  | 6.043  | -0.726 |
| C | 7.903  | 7.768  | 3.883  |
| H | 8.692  | 7.383  | 4.531  |
| H | 7.092  | 8.164  | 4.502  |
| N | 6.109  | 6.614  | 2.514  |
| H | 5.427  | 7.380  | 2.654  |
| C | 7.403  | 6.660  | 3.003  |
| C | 5.966  | 5.514  | 1.756  |
| H | 5.055  | 5.231  | 1.252  |
| N | 7.114  | 4.830  | 1.722  |
| C | 8.015  | 5.544  | 2.495  |
| H | 9.033  | 5.217  | 2.609  |
| C | 13.540 | -2.126 | -0.036 |
| H | 14.390 | -2.228 | 0.645  |
| H | 13.796 | -1.363 | -0.781 |
| C | 12.305 | -1.727 | 0.756  |
| C | 11.097 | -1.350 | 0.145  |
| H | 11.015 | -1.398 | -0.935 |
| C | 10.009 | -0.881 | 0.884  |
| H | 9.090  | -0.581 | 0.390  |
| C | 10.130 | -0.767 | 2.268  |
| O | 9.076  | -0.221 | 3.016  |
| H | 9.471  | 0.223  | 3.812  |
| C | 12.362 | -1.658 | 2.154  |
| H | 13.266 | -1.975 | 2.667  |
| C | 11.292 | -1.184 | 2.912  |
| H | 11.373 | -1.116 | 3.992  |
| C | 13.018 | 1.811  | -0.073 |
| H | 12.993 | 0.746  | -0.317 |
| H | 13.798 | 1.949  | 0.679  |
| N | 11.550 | 2.448  | 1.846  |
| H | 12.331 | 2.322  | 2.517  |

|    |        |        |        |
|----|--------|--------|--------|
| C  | 11.704 | 2.268  | 0.485  |
| C  | 10.270 | 2.750  | 2.113  |
| H  | 9.878  | 2.919  | 3.104  |
| N  | 9.566  | 2.790  | 0.971  |
| C  | 10.460 | 2.490  | -0.047 |
| H  | 10.140 | 2.451  | -1.074 |
| C  | 4.474  | 1.387  | -1.107 |
| C  | 3.616  | -0.284 | -2.659 |
| H  | 3.704  | -1.229 | -3.184 |
| C  | 4.618  | 0.162  | -1.821 |
| H  | 5.518  | -0.424 | -1.672 |
| C  | 2.461  | 0.494  | -2.862 |
| O  | 1.538  | 0.037  | -3.754 |
| H  | 0.875  | 0.729  | -3.894 |
| C  | 3.277  | 2.139  | -1.295 |
| H  | 3.148  | 3.071  | -0.760 |
| C  | 2.296  | 1.701  | -2.159 |
| H  | 1.393  | 2.290  | -2.292 |
| C  | 5.465  | 1.820  | -0.213 |
| O  | 5.283  | 2.995  | 0.553  |
| C  | 6.265  | 1.324  | 3.148  |
| H  | 6.396  | 0.428  | 3.768  |
| H  | 4.918  | 2.740  | 1.433  |
| O  | 7.393  | 1.682  | 2.514  |
| H  | 8.091  | 0.943  | 2.585  |
| O  | 6.778  | 1.503  | -0.239 |
| O  | 5.230  | 1.942  | 3.070  |
| Fe | 7.517  | 3.057  | 0.637  |

Model 1A1

E=-3130.491238 au ZPE=0.5613524034 au

|   |       |       |        |
|---|-------|-------|--------|
| C | 8.896 | 6.372 | -3.389 |
| H | 8.387 | 7.241 | -3.028 |
| H | 8.639 | 6.208 | -4.415 |
| N | 8.469 | 3.881 | -3.037 |
| H | 8.775 | 3.581 | -3.974 |
| C | 8.490 | 5.184 | -2.577 |
| C | 8.138 | 3.073 | -2.007 |
| H | 8.090 | 1.999 | -2.083 |
| N | 7.941 | 3.788 | -0.898 |
| C | 8.146 | 5.105 | -1.253 |
| H | 8.057 | 5.906 | -0.539 |
| C | 7.917 | 7.936 | 3.870  |

|   |        |        |        |
|---|--------|--------|--------|
| H | 8.667  | 7.577  | 4.543  |
| H | 7.074  | 8.285  | 4.429  |
| N | 6.201  | 6.691  | 2.479  |
| H | 5.472  | 7.408  | 2.622  |
| C | 7.488  | 6.823  | 2.961  |
| C | 6.138  | 5.588  | 1.706  |
| H | 5.241  | 5.221  | 1.232  |
| N | 7.334  | 5.003  | 1.656  |
| C | 8.182  | 5.765  | 2.430  |
| H | 9.218  | 5.500  | 2.539  |
| C | 13.862 | -2.286 | 0.000  |
| H | 14.598 | -2.496 | 0.747  |
| H | 14.226 | -1.522 | -0.655 |
| C | 12.585 | -1.814 | 0.667  |
| C | 11.499 | -1.378 | -0.105 |
| H | 11.573 | -1.414 | -1.182 |
| C | 10.341 | -0.880 | 0.473  |
| H | 9.530  | -0.524 | -0.152 |
| C | 10.254 | -0.786 | 1.861  |
| O | 9.098  | -0.223 | 2.391  |
| H | 9.296  | 0.185  | 3.273  |
| C | 12.453 | -1.750 | 2.057  |
| H | 13.267 | -2.099 | 2.687  |
| C | 11.299 | -1.242 | 2.662  |
| H | 11.231 | -1.183 | 3.744  |
| C | 13.031 | 1.890  | 0.065  |
| H | 12.890 | 0.847  | -0.128 |
| H | 13.853 | 2.020  | 0.738  |
| N | 11.673 | 2.572  | 2.051  |
| H | 12.462 | 2.371  | 2.690  |
| C | 11.787 | 2.457  | 0.680  |
| C | 10.422 | 2.960  | 2.362  |
| H | 10.059 | 3.102  | 3.368  |
| N | 9.707  | 3.127  | 1.244  |
| C | 10.559 | 2.819  | 0.192  |
| H | 10.236 | 2.871  | -0.829 |
| C | 4.365  | 1.412  | -0.729 |
| C | 3.036  | -0.096 | -2.089 |
| H | 2.852  | -1.070 | -2.525 |
| C | 4.115  | 0.127  | -1.264 |
| H | 4.765  | -0.707 | -1.028 |
| C | 2.150  | 0.958  | -2.379 |
| O | 1.118  | 0.669  | -3.185 |
| H | 0.611  | 1.472  | -3.391 |

|    |       |        |        |
|----|-------|--------|--------|
| C  | 3.461 | 2.457  | -1.026 |
| H  | 3.620 | 3.436  | -0.592 |
| C  | 2.365 | 2.237  | -1.836 |
| H  | 1.661 | 3.039  | -2.031 |
| C  | 5.548 | 1.677  | 0.045  |
| O  | 5.811 | 2.824  | 0.496  |
| C  | 6.567 | 0.581  | 0.309  |
| H  | 6.660 | -0.104 | -0.537 |
| H  | 6.249 | 0.016  | 1.192  |
| O  | 7.838 | 1.199  | 0.539  |
| H  | 8.312 | 0.705  | 1.277  |
| O  | 7.416 | 2.725  | 2.721  |
| O  | 6.896 | 1.619  | 3.059  |
| Fe | 7.686 | 3.140  | 1.032  |

Model <sup>1</sup>TS1

E=-3130.439944 au ZPE=0.5558587378 au

|   |        |        |        |
|---|--------|--------|--------|
| C | 8.923  | 6.407  | -3.397 |
| H | 8.417  | 7.281  | -3.045 |
| H | 8.666  | 6.234  | -4.421 |
| N | 8.450  | 3.925  | -3.037 |
| H | 8.735  | 3.620  | -3.979 |
| C | 8.512  | 5.228  | -2.575 |
| C | 8.127  | 3.124  | -2.004 |
| H | 8.031  | 2.052  | -2.079 |
| N | 7.981  | 3.843  | -0.887 |
| C | 8.204  | 5.157  | -1.243 |
| H | 8.150  | 5.958  | -0.526 |
| C | 7.939  | 7.930  | 3.867  |
| H | 8.689  | 7.573  | 4.541  |
| H | 7.093  | 8.274  | 4.425  |
| N | 6.231  | 6.686  | 2.467  |
| H | 5.499  | 7.399  | 2.615  |
| C | 7.517  | 6.818  | 2.954  |
| C | 6.173  | 5.592  | 1.682  |
| H | 5.282  | 5.221  | 1.203  |
| N | 7.371  | 5.012  | 1.631  |
| C | 8.216  | 5.767  | 2.416  |
| H | 9.253  | 5.506  | 2.524  |
| C | 13.858 | -2.292 | -0.008 |
| H | 14.586 | -2.502 | 0.748  |
| H | 14.231 | -1.530 | -0.661 |
| C | 12.576 | -1.815 | 0.644  |

|    |        |        |        |
|----|--------|--------|--------|
| C  | 11.496 | -1.389 | -0.142 |
| H  | 11.577 | -1.444 | -1.217 |
| C  | 10.336 | -0.877 | 0.417  |
| H  | 9.527  | -0.536 | -0.220 |
| C  | 10.244 | -0.760 | 1.803  |
| O  | 9.091  | -0.169 | 2.314  |
| H  | 9.280  | 0.238  | 3.199  |
| C  | 12.434 | -1.733 | 2.033  |
| H  | 13.241 | -2.075 | 2.674  |
| C  | 11.278 | -1.211 | 2.620  |
| H  | 11.200 | -1.137 | 3.700  |
| C  | 13.036 | 1.879  | 0.069  |
| H  | 12.899 | 0.836  | -0.128 |
| H  | 13.857 | 2.010  | 0.743  |
| N  | 11.678 | 2.577  | 2.054  |
| H  | 12.471 | 2.390  | 2.693  |
| C  | 11.790 | 2.439  | 0.685  |
| C  | 10.425 | 2.959  | 2.364  |
| H  | 10.061 | 3.114  | 3.368  |
| N  | 9.706  | 3.098  | 1.245  |
| C  | 10.557 | 2.778  | 0.195  |
| H  | 10.230 | 2.808  | -0.825 |
| C  | 4.344  | 1.400  | -0.682 |
| C  | 3.066  | -0.136 | -2.059 |
| H  | 2.912  | -1.112 | -2.502 |
| C  | 4.127  | 0.109  | -1.214 |
| H  | 4.810  | -0.700 | -0.986 |
| C  | 2.164  | 0.899  | -2.366 |
| O  | 1.149  | 0.594  | -3.192 |
| H  | 0.635  | 1.392  | -3.402 |
| C  | 3.429  | 2.427  | -1.001 |
| H  | 3.570  | 3.413  | -0.577 |
| C  | 2.346  | 2.183  | -1.822 |
| H  | 1.630  | 2.971  | -2.032 |
| C  | 5.549  | 1.721  | 0.055  |
| O  | 5.826  | 2.947  | 0.323  |
| C  | 6.487  | 0.735  | 0.507  |
| H  | 6.415  | -0.323 | 0.284  |
| H  | 6.372  | 1.029  | 2.013  |
| O  | 7.806  | 1.237  | 0.536  |
| H  | 8.356  | 0.728  | 1.231  |
| O  | 7.177  | 2.753  | 2.638  |
| O  | 6.716  | 1.526  | 2.944  |
| Fe | 7.697  | 3.159  | 0.981  |

Model 1A2

E=-3130.468924 au ZPE=0.5555867853 au

|   |        |        |        |
|---|--------|--------|--------|
| C | 8.888  | 6.378  | -3.389 |
| H | 8.377  | 7.246  | -3.030 |
| H | 8.632  | 6.213  | -4.415 |
| N | 8.451  | 3.891  | -3.041 |
| H | 8.749  | 3.593  | -3.982 |
| C | 8.484  | 5.190  | -2.577 |
| C | 8.137  | 3.079  | -2.010 |
| H | 8.065  | 2.006  | -2.097 |
| N | 7.957  | 3.789  | -0.896 |
| C | 8.158  | 5.107  | -1.248 |
| H | 8.084  | 5.905  | -0.529 |
| C | 7.851  | 7.864  | 3.858  |
| H | 8.602  | 7.495  | 4.525  |
| H | 7.010  | 8.208  | 4.423  |
| N | 6.147  | 6.678  | 2.393  |
| H | 5.431  | 7.411  | 2.524  |
| C | 7.417  | 6.763  | 2.935  |
| C | 6.078  | 5.579  | 1.617  |
| H | 5.196  | 5.253  | 1.091  |
| N | 7.254  | 4.949  | 1.622  |
| C | 8.093  | 5.680  | 2.435  |
| H | 9.113  | 5.378  | 2.589  |
| C | 13.817 | -2.275 | 0.016  |
| H | 14.531 | -2.480 | 0.786  |
| H | 14.199 | -1.512 | -0.629 |
| C | 12.519 | -1.805 | 0.642  |
| C | 11.463 | -1.369 | -0.171 |
| H | 11.578 | -1.410 | -1.243 |
| C | 10.286 | -0.865 | 0.357  |
| H | 9.501  | -0.515 | -0.304 |
| C | 10.157 | -0.765 | 1.739  |
| O | 8.975  | -0.184 | 2.228  |
| H | 9.138  | 0.247  | 3.112  |
| C | 12.336 | -1.737 | 2.026  |
| H | 13.124 | -2.084 | 2.688  |
| C | 11.163 | -1.220 | 2.586  |
| H | 11.056 | -1.154 | 3.664  |
| C | 12.998 | 1.880  | 0.092  |
| H | 12.871 | 0.835  | -0.102 |
| H | 13.817 | 2.020  | 0.766  |
| N | 11.629 | 2.564  | 2.076  |
| H | 12.421 | 2.383  | 2.716  |

|    |        |        |        |
|----|--------|--------|--------|
| C  | 11.745 | 2.431  | 0.706  |
| C  | 10.368 | 2.930  | 2.381  |
| H  | 9.998  | 3.079  | 3.383  |
| N  | 9.648  | 3.060  | 1.263  |
| C  | 10.508 | 2.753  | 0.216  |
| H  | 10.187 | 2.782  | -0.807 |
| C  | 4.353  | 1.316  | -0.721 |
| C  | 3.062  | -0.189 | -2.122 |
| H  | 2.908  | -1.158 | -2.581 |
| C  | 4.134  | 0.041  | -1.287 |
| H  | 4.808  | -0.780 | -1.075 |
| C  | 2.154  | 0.848  | -2.397 |
| O  | 1.127  | 0.555  | -3.216 |
| H  | 0.616  | 1.358  | -3.411 |
| C  | 3.433  | 2.344  | -1.005 |
| H  | 3.573  | 3.322  | -0.560 |
| C  | 2.342  | 2.117  | -1.825 |
| H  | 1.624  | 2.910  | -2.009 |
| C  | 5.556  | 1.606  | 0.041  |
| O  | 5.799  | 2.815  | 0.487  |
| C  | 6.586  | 0.674  | 0.222  |
| H  | 6.545  | -0.391 | 0.033  |
| H  | 5.519  | 3.025  | 2.451  |
| O  | 7.775  | 1.197  | 0.552  |
| H  | 8.336  | 0.611  | 1.257  |
| O  | 7.322  | 2.546  | 2.712  |
| O  | 6.098  | 2.993  | 3.244  |
| Fe | 7.625  | 3.111  | 1.011  |

Model <sup>1</sup>TS2

E=-3130.466703 au ZPE=0.5615801553 au

|   |       |       |        |
|---|-------|-------|--------|
| C | 8.917 | 6.430 | -3.420 |
| H | 8.408 | 7.301 | -3.062 |
| H | 8.661 | 6.264 | -4.446 |
| N | 8.469 | 3.949 | -3.075 |
| H | 8.759 | 3.649 | -4.018 |
| C | 8.509 | 5.246 | -2.607 |
| C | 8.168 | 3.136 | -2.041 |
| H | 8.092 | 2.063 | -2.125 |
| N | 8.009 | 3.845 | -0.925 |
| C | 8.202 | 5.162 | -1.274 |
| H | 8.135 | 5.957 | -0.549 |
| C | 7.867 | 7.852 | 3.863  |
| H | 8.621 | 7.484 | 4.527  |

|   |        |        |        |
|---|--------|--------|--------|
| H | 7.030  | 8.200  | 4.432  |
| N | 6.158  | 6.679  | 2.401  |
| H | 5.449  | 7.421  | 2.526  |
| C | 7.425  | 6.748  | 2.947  |
| C | 6.079  | 5.581  | 1.624  |
| H | 5.198  | 5.278  | 1.081  |
| N | 7.242  | 4.929  | 1.640  |
| C | 8.088  | 5.653  | 2.453  |
| H | 9.105  | 5.343  | 2.606  |
| C | 13.828 | -2.283 | 0.014  |
| H | 14.540 | -2.490 | 0.785  |
| H | 14.212 | -1.519 | -0.630 |
| C | 12.530 | -1.812 | 0.639  |
| C | 11.472 | -1.384 | -0.177 |
| H | 11.587 | -1.432 | -1.248 |
| C | 10.295 | -0.880 | 0.349  |
| H | 9.505  | -0.541 | -0.312 |
| C | 10.165 | -0.771 | 1.731  |
| O | 8.987  | -0.182 | 2.210  |
| H | 9.147  | 0.247  | 3.094  |
| C | 12.347 | -1.738 | 2.023  |
| H | 13.136 | -2.080 | 2.686  |
| C | 11.172 | -1.220 | 2.579  |
| H | 11.065 | -1.149 | 3.657  |
| C | 12.993 | 1.873  | 0.092  |
| H | 12.874 | 0.828  | -0.104 |
| H | 13.808 | 2.018  | 0.770  |
| N | 11.610 | 2.554  | 2.069  |
| H | 12.399 | 2.379  | 2.714  |
| C | 11.734 | 2.414  | 0.701  |
| C | 10.344 | 2.913  | 2.366  |
| H | 9.973  | 3.066  | 3.367  |
| N | 9.627  | 3.031  | 1.244  |
| C | 10.497 | 2.724  | 0.204  |
| H | 10.183 | 2.746  | -0.821 |
| C | 4.313  | 1.329  | -0.623 |
| C | 3.098  | -0.213 | -2.050 |
| H | 2.978  | -1.187 | -2.510 |
| C | 4.137  | 0.042  | -1.178 |
| H | 4.838  | -0.755 | -0.952 |
| C | 2.183  | 0.806  | -2.366 |
| O | 1.187  | 0.494  | -3.217 |
| H | 0.670  | 1.288  | -3.430 |
| C | 3.392  | 2.343  | -0.961 |

|    |       |        |        |
|----|-------|--------|--------|
| H  | 3.511 | 3.331  | -0.536 |
| C  | 2.331 | 2.087  | -1.807 |
| H  | 1.608 | 2.867  | -2.025 |
| C  | 5.505 | 1.680  | 0.120  |
| O  | 5.816 | 2.923  | 0.309  |
| C  | 6.488 | 0.738  | 0.544  |
| H  | 6.315 | -0.323 | 0.690  |
| H  | 5.416 | 3.175  | 2.431  |
| O  | 7.758 | 1.154  | 0.476  |
| H  | 8.343 | 0.634  | 1.192  |
| O  | 7.049 | 2.249  | 2.460  |
| O  | 5.989 | 2.860  | 3.159  |
| Fe | 7.604 | 3.121  | 0.924  |

Model <sup>1</sup>A3

E=-3130.513930 au ZPE=0.5669586703 au

|   |        |        |        |
|---|--------|--------|--------|
| C | 8.960  | 6.524  | -3.458 |
| H | 8.471  | 7.406  | -3.101 |
| H | 8.713  | 6.371  | -4.488 |
| N | 8.429  | 4.056  | -3.136 |
| H | 8.724  | 3.752  | -4.075 |
| C | 8.509  | 5.347  | -2.658 |
| C | 8.085  | 3.245  | -2.112 |
| H | 7.970  | 2.176  | -2.201 |
| N | 7.937  | 3.954  | -0.993 |
| C | 8.183  | 5.266  | -1.329 |
| H | 8.135  | 6.057  | -0.599 |
| C | 7.972  | 7.922  | 3.908  |
| H | 8.738  | 7.546  | 4.554  |
| H | 7.153  | 8.280  | 4.497  |
| N | 6.209  | 6.763  | 2.511  |
| H | 5.510  | 7.511  | 2.657  |
| C | 7.496  | 6.824  | 3.006  |
| C | 6.106  | 5.683  | 1.710  |
| H | 5.211  | 5.401  | 1.179  |
| N | 7.270  | 5.031  | 1.667  |
| C | 8.143  | 5.741  | 2.465  |
| H | 9.167  | 5.434  | 2.572  |
| C | 13.751 | -2.239 | -0.013 |
| H | 14.481 | -2.426 | 0.746  |
| H | 14.107 | -1.473 | -0.670 |
| C | 12.454 | -1.789 | 0.633  |
| C | 11.371 | -1.373 | -0.154 |

|    |        |        |        |
|----|--------|--------|--------|
| H  | 11.462 | -1.414 | -1.229 |
| C  | 10.200 | -0.881 | 0.404  |
| H  | 9.387  | -0.551 | -0.235 |
| C  | 10.097 | -0.774 | 1.789  |
| O  | 8.933  | -0.206 | 2.306  |
| H  | 9.141  | 0.245  | 3.164  |
| C  | 12.302 | -1.718 | 2.022  |
| H  | 13.111 | -2.051 | 2.665  |
| C  | 11.135 | -1.217 | 2.607  |
| H  | 11.052 | -1.153 | 3.687  |
| C  | 12.947 | 1.849  | 0.042  |
| H  | 12.819 | 0.808  | -0.172 |
| H  | 13.748 | 1.974  | 0.740  |
| N  | 11.558 | 2.571  | 1.993  |
| H  | 12.342 | 2.405  | 2.645  |
| C  | 11.681 | 2.397  | 0.631  |
| C  | 10.294 | 2.952  | 2.276  |
| H  | 9.927  | 3.133  | 3.273  |
| N  | 9.579  | 3.050  | 1.152  |
| C  | 10.446 | 2.705  | 0.123  |
| H  | 10.130 | 2.704  | -0.903 |
| C  | 4.281  | 1.488  | -0.647 |
| C  | 3.289  | -0.278 | -1.975 |
| H  | 3.219  | -1.313 | -2.286 |
| C  | 4.163  | 0.120  | -0.983 |
| H  | 4.788  | -0.625 | -0.499 |
| C  | 2.462  | 0.672  | -2.604 |
| O  | 1.613  | 0.227  | -3.548 |
| H  | 1.106  | 0.970  | -3.912 |
| C  | 3.455  | 2.432  | -1.302 |
| H  | 3.527  | 3.477  | -1.025 |
| C  | 2.542  | 2.031  | -2.251 |
| H  | 1.889  | 2.756  | -2.723 |
| C  | 5.293  | 1.978  | 0.240  |
| O  | 5.628  | 3.188  | 0.276  |
| C  | 6.193  | 1.117  | 1.146  |
| H  | 5.806  | 0.141  | 1.445  |
| H  | 5.107  | 3.140  | 2.607  |
| O  | 7.443  | 1.087  | 0.513  |
| H  | 8.082  | 0.619  | 1.143  |
| O  | 6.520  | 1.907  | 2.323  |
| O  | 5.310  | 2.279  | 3.020  |
| Fe | 7.589  | 3.274  | 0.818  |



Model 'TS3'

E=-3130.504130 au ZPE=-3130.504130 au

|   |        |        |        |
|---|--------|--------|--------|
| C | 8.967  | 6.497  | -3.488 |
| H | 8.467  | 7.372  | -3.128 |
| H | 8.722  | 6.344  | -4.518 |
| N | 8.469  | 4.017  | -3.164 |
| H | 8.759  | 3.716  | -4.106 |
| C | 8.531  | 5.312  | -2.692 |
| C | 8.145  | 3.204  | -2.135 |
| H | 8.047  | 2.133  | -2.221 |
| N | 7.993  | 3.915  | -1.019 |
| C | 8.213  | 5.231  | -1.361 |
| H | 8.157  | 6.023  | -0.634 |
| C | 7.978  | 7.964  | 3.884  |
| H | 8.736  | 7.603  | 4.547  |
| H | 7.143  | 8.315  | 4.454  |
| N | 6.245  | 6.737  | 2.504  |
| H | 5.521  | 7.460  | 2.656  |
| C | 7.535  | 6.854  | 2.981  |
| C | 6.175  | 5.654  | 1.705  |
| H | 5.282  | 5.315  | 1.205  |
| N | 7.369  | 5.056  | 1.641  |
| C | 8.221  | 5.802  | 2.431  |
| H | 9.259  | 5.538  | 2.523  |
| C | 13.771 | -2.229 | -0.023 |
| H | 14.522 | -2.418 | 0.715  |
| H | 14.114 | -1.470 | -0.695 |
| C | 12.498 | -1.764 | 0.658  |
| C | 11.392 | -1.339 | -0.092 |
| H | 11.440 | -1.386 | -1.171 |
| C | 10.250 | -0.826 | 0.509  |
| H | 9.420  | -0.480 | -0.097 |
| C | 10.202 | -0.712 | 1.897  |
| O | 9.071  | -0.124 | 2.458  |
| H | 9.317  | 0.323  | 3.308  |
| C | 12.399 | -1.687 | 2.051  |
| H | 13.227 | -2.030 | 2.665  |
| C | 11.262 | -1.168 | 2.677  |
| H | 11.218 | -1.097 | 3.759  |
| C | 13.058 | 1.870  | -0.008 |
| H | 12.917 | 0.830  | -0.218 |
| H | 13.869 | 1.989  | 0.680  |
| N | 11.699 | 2.619  | 1.955  |

|    |        |        |        |
|----|--------|--------|--------|
| H  | 12.486 | 2.440  | 2.603  |
| C  | 11.806 | 2.432  | 0.594  |
| C  | 10.450 | 3.035  | 2.245  |
| H  | 10.095 | 3.222  | 3.245  |
| N  | 9.728  | 3.143  | 1.126  |
| C  | 10.576 | 2.770  | 0.093  |
| H  | 10.246 | 2.769  | -0.928 |
| C  | 4.336  | 1.484  | -0.642 |
| C  | 3.206  | -0.174 | -2.005 |
| H  | 3.073  | -1.191 | -2.351 |
| C  | 4.138  | 0.140  | -1.037 |
| H  | 4.735  | -0.659 | -0.613 |
| C  | 2.404  | 0.838  | -2.561 |
| O  | 1.507  | 0.467  | -3.491 |
| H  | 1.018  | 1.242  | -3.813 |
| C  | 3.526  | 2.489  | -1.219 |
| H  | 3.652  | 3.514  | -0.896 |
| C  | 2.561  | 2.173  | -2.150 |
| H  | 1.922  | 2.950  | -2.557 |
| C  | 5.409  | 1.881  | 0.224  |
| O  | 5.807  | 3.067  | 0.308  |
| C  | 6.253  | 0.893  | 1.041  |
| H  | 6.095  | -0.165 | 0.825  |
| H  | 5.643  | 2.776  | 3.100  |
| O  | 7.603  | 1.237  | 0.729  |
| H  | 8.212  | 0.749  | 1.370  |
| O  | 6.053  | 1.038  | 2.445  |
| O  | 5.070  | 2.058  | 2.775  |
| Fe | 7.737  | 3.297  | 0.815  |

Model 'A4'

E=-3130.529514 au ZPE=0.5650352558 au

|   |       |       |        |
|---|-------|-------|--------|
| C | 8.950 | 6.480 | -3.454 |
| H | 8.453 | 7.356 | -3.092 |
| H | 8.698 | 6.326 | -4.482 |
| N | 8.453 | 4.002 | -3.126 |
| H | 8.741 | 3.699 | -4.067 |
| C | 8.519 | 5.296 | -2.653 |
| C | 8.134 | 3.191 | -2.092 |
| H | 8.031 | 2.120 | -2.179 |
| N | 7.988 | 3.898 | -0.974 |
| C | 8.210 | 5.212 | -1.320 |
| H | 8.158 | 6.006 | -0.593 |
| C | 8.011 | 7.952 | 3.900  |

|   |        |        |        |
|---|--------|--------|--------|
| H | 8.769  | 7.583  | 4.558  |
| H | 7.183  | 8.309  | 4.475  |
| N | 6.260  | 6.748  | 2.525  |
| H | 5.543  | 7.474  | 2.683  |
| C | 7.553  | 6.849  | 2.998  |
| C | 6.179  | 5.668  | 1.720  |
| H | 5.276  | 5.332  | 1.239  |
| N | 7.363  | 5.063  | 1.646  |
| C | 8.226  | 5.795  | 2.434  |
| H | 9.262  | 5.520  | 2.518  |
| C | 13.825 | -2.272 | -0.020 |
| H | 14.566 | -2.470 | 0.726  |
| H | 14.180 | -1.510 | -0.682 |
| C | 12.547 | -1.805 | 0.649  |
| C | 11.441 | -1.412 | -0.120 |
| H | 11.499 | -1.487 | -1.196 |
| C | 10.290 | -0.899 | 0.457  |
| H | 9.459  | -0.585 | -0.166 |
| C | 10.232 | -0.748 | 1.841  |
| O | 9.087  | -0.158 | 2.373  |
| H | 9.319  | 0.309  | 3.211  |
| C | 12.436 | -1.694 | 2.039  |
| H | 13.262 | -2.014 | 2.667  |
| C | 11.289 | -1.170 | 2.643  |
| H | 11.233 | -1.073 | 3.722  |
| C | 13.037 | 1.819  | -0.024 |
| H | 12.891 | 0.783  | -0.249 |
| H | 13.850 | 1.923  | 0.664  |
| N | 11.734 | 2.665  | 1.934  |
| H | 12.545 | 2.547  | 2.565  |
| C | 11.789 | 2.378  | 0.589  |
| C | 10.483 | 3.067  | 2.241  |
| H | 10.170 | 3.325  | 3.236  |
| N | 9.709  | 3.068  | 1.155  |
| C | 10.527 | 2.638  | 0.119  |
| H | 10.162 | 2.552  | -0.888 |
| C | 4.333  | 1.467  | -0.562 |
| C | 3.274  | -0.203 | -1.967 |
| H | 3.183  | -1.217 | -2.336 |
| C | 4.189  | 0.126  | -0.985 |
| H | 4.817  | -0.659 | -0.577 |
| C | 2.438  | 0.790  | -2.507 |
| O | 1.561  | 0.409  | -3.454 |
| H | 1.054  | 1.175  | -3.768 |

|    |       |        |        |
|----|-------|--------|--------|
| C  | 3.488 | 2.454  | -1.121 |
| H  | 3.575 | 3.478  | -0.781 |
| C  | 2.539 | 2.121  | -2.063 |
| H  | 1.873 | 2.881  | -2.458 |
| C  | 5.402 | 1.895  | 0.300  |
| O  | 5.742 | 3.095  | 0.398  |
| C  | 6.324 | 0.940  | 1.080  |
| H  | 6.018 | -0.111 | 1.080  |
| H  | 7.716 | 2.229  | 3.318  |
| O  | 7.607 | 1.153  | 0.538  |
| H  | 8.257 | 0.690  | 1.146  |
| O  | 6.322 | 1.233  | 2.476  |
| O  | 7.023 | 2.519  | 2.696  |
| Fe | 7.685 | 3.259  | 0.885  |

Model 'TS4'

E=-3130.510004 au ZPE=0.5642942460 au

|   |        |        |        |
|---|--------|--------|--------|
| C | 8.936  | 6.467  | -3.446 |
| H | 8.432  | 7.371  | -3.098 |
| H | 8.697  | 6.338  | -4.505 |
| N | 8.456  | 3.988  | -3.077 |
| H | 8.765  | 3.673  | -4.008 |
| C | 8.485  | 5.297  | -2.633 |
| C | 8.089  | 3.200  | -2.045 |
| H | 7.994  | 2.127  | -2.115 |
| N | 7.873  | 3.932  | -0.950 |
| C | 8.106  | 5.242  | -1.319 |
| H | 8.008  | 6.054  | -0.617 |
| C | 8.031  | 7.995  | 3.922  |
| H | 8.808  | 7.622  | 4.593  |
| H | 7.202  | 8.391  | 4.517  |
| N | 6.277  | 6.785  | 2.557  |
| H | 5.559  | 7.512  | 2.714  |
| C | 7.571  | 6.887  | 3.028  |
| C | 6.190  | 5.703  | 1.759  |
| H | 5.286  | 5.355  | 1.286  |
| N | 7.377  | 5.104  | 1.686  |
| C | 8.244  | 5.832  | 2.470  |
| H | 9.280  | 5.552  | 2.549  |
| C | 13.808 | -2.261 | -0.016 |
| H | 14.572 | -2.470 | 0.739  |
| H | 14.192 | -1.492 | -0.697 |
| C | 12.525 | -1.787 | 0.642  |
| C | 11.426 | -1.394 | -0.136 |

|    |        |        |        |
|----|--------|--------|--------|
| H  | 11.490 | -1.475 | -1.211 |
| C  | 10.272 | -0.875 | 0.431  |
| H  | 9.446  | -0.560 | -0.199 |
| C  | 10.202 | -0.717 | 1.814  |
| O  | 9.054  | -0.125 | 2.331  |
| H  | 9.272  | 0.343  | 3.173  |
| C  | 12.406 | -1.666 | 2.030  |
| H  | 13.228 | -1.982 | 2.666  |
| C  | 11.254 | -1.138 | 2.623  |
| H  | 11.192 | -1.036 | 3.702  |
| C  | 13.138 | 1.796  | -0.067 |
| H  | 13.035 | 0.736  | -0.312 |
| H  | 13.983 | 1.885  | 0.622  |
| N  | 11.907 | 2.642  | 1.934  |
| H  | 12.743 | 2.541  | 2.539  |
| C  | 11.908 | 2.340  | 0.591  |
| C  | 10.672 | 3.047  | 2.288  |
| H  | 10.402 | 3.313  | 3.294  |
| N  | 9.853  | 3.033  | 1.237  |
| C  | 10.624 | 2.593  | 0.173  |
| H  | 10.216 | 2.502  | -0.819 |
| C  | 4.289  | 1.405  | -0.604 |
| C  | 3.321  | -0.274 | -2.059 |
| H  | 3.266  | -1.286 | -2.441 |
| C  | 4.210  | 0.072  | -1.057 |
| H  | 4.859  | -0.696 | -0.647 |
| C  | 2.457  | 0.696  | -2.596 |
| O  | 1.602  | 0.300  | -3.560 |
| H  | 1.079  | 1.058  | -3.865 |
| C  | 3.419  | 2.369  | -1.162 |
| H  | 3.462  | 3.386  | -0.794 |
| C  | 2.505  | 2.022  | -2.134 |
| H  | 1.822  | 2.765  | -2.530 |
| C  | 5.261  | 1.878  | 0.357  |
| O  | 5.443  | 3.086  | 0.572  |
| C  | 6.240  | 0.947  | 1.119  |
| H  | 5.985  | -0.120 | 1.076  |
| H  | 7.597  | 2.411  | 3.372  |
| O  | 7.527  | 1.217  | 0.553  |
| H  | 8.192  | 0.737  | 1.135  |
| O  | 6.266  | 1.178  | 2.491  |
| O  | 6.979  | 2.670  | 2.663  |
| Fe | 7.666  | 3.272  | 0.998  |

Model 1A7

E=-3130.639140 au ZPE=0.5692427303 au

|   |        |        |        |
|---|--------|--------|--------|
| C | 8.994  | 6.580  | -3.483 |
| H | 8.506  | 7.485  | -3.118 |
| H | 8.747  | 6.470  | -4.542 |
| N | 8.411  | 4.127  | -3.203 |
| H | 8.697  | 3.833  | -4.147 |
| C | 8.527  | 5.403  | -2.694 |
| C | 8.044  | 3.305  | -2.196 |
| H | 7.887  | 2.244  | -2.323 |
| N | 7.919  | 3.988  | -1.059 |
| C | 8.204  | 5.299  | -1.364 |
| H | 8.177  | 6.072  | -0.613 |
| C | 7.921  | 7.759  | 3.856  |
| H | 8.707  | 7.385  | 4.515  |
| H | 7.097  | 8.144  | 4.465  |
| N | 6.151  | 6.536  | 2.510  |
| H | 5.445  | 7.273  | 2.650  |
| C | 7.450  | 6.644  | 2.968  |
| C | 6.053  | 5.428  | 1.742  |
| H | 5.145  | 5.088  | 1.271  |
| N | 7.232  | 4.812  | 1.677  |
| C | 8.109  | 5.563  | 2.436  |
| H | 9.142  | 5.283  | 2.528  |
| C | 13.592 | -2.121 | -0.015 |
| H | 14.425 | -2.248 | 0.683  |
| H | 13.879 | -1.359 | -0.749 |
| C | 12.348 | -1.698 | 0.750  |
| C | 11.173 | -1.282 | 0.102  |
| H | 11.128 | -1.311 | -0.980 |
| C | 10.076 | -0.795 | 0.812  |
| H | 9.183  | -0.466 | 0.289  |
| C | 10.145 | -0.699 | 2.200  |
| O | 9.072  | -0.141 | 2.901  |
| H | 9.430  | 0.305  | 3.715  |
| C | 12.359 | -1.642 | 2.149  |
| H | 13.240 | -1.983 | 2.686  |
| C | 11.276 | -1.151 | 2.877  |
| H | 11.324 | -1.093 | 3.960  |
| C | 13.045 | 1.886  | -0.029 |
| H | 12.986 | 0.817  | -0.252 |
| H | 13.837 | 2.013  | 0.713  |
| N | 11.589 | 2.507  | 1.900  |
| H | 12.357 | 2.330  | 2.570  |

|                                       |        |        |        |   |        |        |        |
|---------------------------------------|--------|--------|--------|---|--------|--------|--------|
| C                                     | 11.752 | 2.392  | 0.536  | H | 7.095  | 8.154  | 4.468  |
| C                                     | 10.314 | 2.860  | 2.163  | N | 6.151  | 6.560  | 2.501  |
| H                                     | 9.914  | 2.995  | 3.155  | H | 5.450  | 7.305  | 2.637  |
| N                                     | 9.631  | 2.999  | 1.023  | C | 7.446  | 6.654  | 2.972  |
| C                                     | 10.527 | 2.710  | 0.004  | C | 6.050  | 5.457  | 1.728  |
| H                                     | 10.229 | 2.758  | -1.027 | H | 5.146  | 5.135  | 1.237  |
| C                                     | 4.221  | 1.409  | -0.921 | N | 7.223  | 4.826  | 1.676  |
| C                                     | 3.093  | -0.243 | -2.276 | C | 8.099  | 5.567  | 2.446  |
| H                                     | 2.908  | -1.268 | -2.572 | H | 9.129  | 5.278  | 2.547  |
| C                                     | 3.951  | 0.064  | -1.238 | C | 13.608 | -2.128 | -0.016 |
| H                                     | 4.441  | -0.727 | -0.682 | H | 14.441 | -2.258 | 0.681  |
| C                                     | 2.442  | 0.787  | -2.971 | H | 13.896 | -1.366 | -0.750 |
| O                                     | 1.601  | 0.415  | -3.959 | C | 12.365 | -1.703 | 0.748  |
| H                                     | 1.173  | 1.200  | -4.338 | C | 11.191 | -1.288 | 0.099  |
| C                                     | 3.585  | 2.436  | -1.641 | H | 11.146 | -1.319 | -0.983 |
| H                                     | 3.783  | 3.469  | -1.383 | C | 10.094 | -0.801 | 0.808  |
| C                                     | 2.684  | 2.130  | -2.645 | H | 9.201  | -0.471 | 0.285  |
| H                                     | 2.173  | 2.922  | -3.181 | C | 10.164 | -0.703 | 2.197  |
| C                                     | 5.204  | 1.751  | 0.091  | O | 9.090  | -0.145 | 2.895  |
| O                                     | 5.724  | 2.877  | 0.177  | H | 9.443  | 0.302  | 3.710  |
| C                                     | 6.127  | 1.030  | 2.201  | C | 12.377 | -1.647 | 2.147  |
| H                                     | 6.277  | 0.032  | 2.616  | H | 13.256 | -1.989 | 2.685  |
| H                                     | 4.390  | 1.452  | 2.908  | C | 11.293 | -1.155 | 2.875  |
| O                                     | 7.358  | 1.673  | 2.107  | H | 11.340 | -1.096 | 3.958  |
| H                                     | 8.094  | 1.022  | 2.325  | C | 13.032 | 1.889  | -0.031 |
| O                                     | 5.571  | 0.727  | 0.888  | H | 12.971 | 0.820  | -0.252 |
| O                                     | 5.282  | 1.836  | 2.911  | H | 13.822 | 2.016  | 0.714  |
| Fe                                    | 7.650  | 3.150  | 0.717  | N | 11.574 | 2.515  | 1.894  |
| Model <sup>1</sup> TS7                |        |        |        | H | 12.340 | 2.332  | 2.565  |
| E=-3130.631667 au ZPE=0.5682478973 au |        |        |        | C | 11.739 | 2.400  | 0.530  |
| C                                     | 8.986  | 6.571  | -3.477 | C | 10.300 | 2.869  | 2.156  |
| H                                     | 8.498  | 7.477  | -3.117 | H | 9.900  | 3.001  | 3.148  |
| H                                     | 8.742  | 6.458  | -4.536 | N | 9.618  | 3.011  | 1.015  |
| N                                     | 8.396  | 4.118  | -3.194 | C | 10.515 | 2.723  | -0.003 |
| H                                     | 8.688  | 3.823  | -4.137 | H | 10.218 | 2.773  | -1.035 |
| C                                     | 8.514  | 5.396  | -2.688 | C | 4.224  | 1.378  | -0.893 |
| C                                     | 8.014  | 3.301  | -2.190 | C | 3.103  | -0.256 | -2.274 |
| H                                     | 7.855  | 2.240  | -2.315 | H | 2.914  | -1.276 | -2.582 |
| N                                     | 7.880  | 3.987  | -1.055 | C | 3.952  | 0.037  | -1.226 |
| C                                     | 8.176  | 5.296  | -1.361 | H | 4.432  | -0.761 | -0.671 |
| H                                     | 8.147  | 6.072  | -0.612 | C | 2.459  | 0.784  | -2.964 |
| C                                     | 7.919  | 7.767  | 3.861  | O | 1.622  | 0.424  | -3.957 |
| H                                     | 8.703  | 7.390  | 4.522  | H | 1.195  | 1.212  | -4.331 |
|                                       |        |        |        | C | 3.597  | 2.416  | -1.609 |

|                                       |        |        |        |    |        |        |        |
|---------------------------------------|--------|--------|--------|----|--------|--------|--------|
| H                                     | 3.792  | 3.446  | -1.336 | C  | 10.106 | -0.809 | 0.823  |
| C                                     | 2.704  | 2.124  | -2.623 | H  | 9.211  | -0.478 | 0.305  |
| H                                     | 2.198  | 2.923  | -3.154 | C  | 10.182 | -0.717 | 2.212  |
| C                                     | 5.171  | 1.716  | 0.151  | O  | 9.109  | -0.162 | 2.918  |
| O                                     | 5.663  | 2.855  | 0.282  | H  | 9.468  | 0.296  | 3.725  |
| C                                     | 6.144  | 0.961  | 2.226  | C  | 12.395 | -1.660 | 2.151  |
| H                                     | 6.374  | -0.026 | 2.626  | H  | 13.276 | -2.004 | 2.684  |
| H                                     | 4.632  | 2.132  | 2.603  | C  | 11.314 | -1.170 | 2.885  |
| O                                     | 7.373  | 1.632  | 2.042  | H  | 11.364 | -1.115 | 3.967  |
| H                                     | 8.125  | 1.009  | 2.286  | C  | 13.026 | 1.891  | -0.036 |
| O                                     | 5.517  | 0.691  | 0.954  | H  | 12.963 | 0.821  | -0.256 |
| O                                     | 5.315  | 1.636  | 3.075  | H  | 13.815 | 2.016  | 0.711  |
| Fe                                    | 7.632  | 3.151  | 0.731  | N  | 11.569 | 2.521  | 1.886  |
| Model <sup>1</sup> A8                 |        |        |        | H  | 12.334 | 2.336  | 2.558  |
| E=-3130.633605 au ZPE=0.5682400269 au |        |        |        | C  | 11.734 | 2.406  | 0.523  |
| C                                     | 8.973  | 6.560  | -3.471 | C  | 10.296 | 2.879  | 2.148  |
| H                                     | 8.485  | 7.467  | -3.111 | H  | 9.896  | 3.009  | 3.140  |
| H                                     | 8.729  | 6.447  | -4.530 | N  | 9.616  | 3.023  | 1.006  |
| N                                     | 8.379  | 4.107  | -3.188 | C  | 10.512 | 2.734  | -0.012 |
| H                                     | 8.673  | 3.811  | -4.130 | H  | 10.213 | 2.785  | -1.043 |
| C                                     | 8.497  | 5.385  | -2.682 | C  | 4.231  | 1.379  | -0.876 |
| C                                     | 7.988  | 3.292  | -2.185 | C  | 3.125  | -0.246 | -2.280 |
| H                                     | 7.827  | 2.231  | -2.310 | H  | 2.939  | -1.265 | -2.597 |
| N                                     | 7.848  | 3.980  | -1.052 | C  | 3.969  | 0.040  | -1.226 |
| C                                     | 8.149  | 5.289  | -1.358 | H  | 4.450  | -0.762 | -0.678 |
| H                                     | 8.119  | 6.065  | -0.611 | C  | 2.478  | 0.798  | -2.961 |
| C                                     | 7.914  | 7.769  | 3.865  | O  | 1.646  | 0.446  | -3.962 |
| H                                     | 8.697  | 7.390  | 4.525  | H  | 1.214  | 1.236  | -4.326 |
| H                                     | 7.090  | 8.157  | 4.472  | C  | 3.600  | 2.420  | -1.581 |
| N                                     | 6.152  | 6.576  | 2.483  | H  | 3.783  | 3.448  | -1.291 |
| H                                     | 5.454  | 7.325  | 2.614  | C  | 2.715  | 2.135  | -2.605 |
| C                                     | 7.440  | 6.657  | 2.973  | H  | 2.206  | 2.937  | -3.128 |
| C                                     | 6.050  | 5.473  | 1.710  | C  | 5.157  | 1.704  | 0.189  |
| H                                     | 5.152  | 5.163  | 1.200  | O  | 5.625  | 2.852  | 0.371  |
| N                                     | 7.218  | 4.828  | 1.678  | C  | 6.172  | 0.967  | 2.231  |
| C                                     | 8.090  | 5.563  | 2.459  | H  | 6.319  | -0.013 | 2.674  |
| H                                     | 9.116  | 5.266  | 2.573  | H  | 5.290  | 2.609  | 2.682  |
| C                                     | 13.617 | -2.133 | -0.018 | O  | 7.424  | 1.561  | 1.984  |
| H                                     | 14.453 | -2.265 | 0.675  | H  | 8.165  | 0.943  | 2.287  |
| H                                     | 13.902 | -1.370 | -0.752 | O  | 5.526  | 0.672  | 0.960  |
| C                                     | 12.377 | -1.710 | 0.752  | O  | 5.384  | 1.717  | 3.049  |
| C                                     | 11.201 | -1.293 | 0.109  | Fe | 7.630  | 3.144  | 0.735  |
| H                                     | 11.152 | -1.321 | -0.974 |    |        |        |        |

Model <sup>1</sup>TS8

E=-3130.607857 au ZPE=0.5638701460 au

|   |        |        |        |
|---|--------|--------|--------|
| C | 8.941  | 6.508  | -3.449 |
| H | 8.446  | 7.410  | -3.084 |
| H | 8.695  | 6.399  | -4.508 |
| N | 8.358  | 4.048  | -3.176 |
| H | 8.652  | 3.759  | -4.120 |
| C | 8.475  | 5.325  | -2.665 |
| C | 7.965  | 3.226  | -2.179 |
| H | 7.798  | 2.167  | -2.311 |
| N | 7.822  | 3.909  | -1.042 |
| C | 8.125  | 5.221  | -1.342 |
| H | 8.093  | 5.994  | -0.592 |
| C | 7.919  | 7.784  | 3.879  |
| H | 8.701  | 7.405  | 4.540  |
| H | 7.094  | 8.171  | 4.484  |
| N | 6.174  | 6.605  | 2.463  |
| H | 5.475  | 7.354  | 2.587  |
| C | 7.450  | 6.673  | 2.985  |
| C | 6.078  | 5.501  | 1.692  |
| H | 5.187  | 5.195  | 1.167  |
| N | 7.239  | 4.844  | 1.691  |
| C | 8.100  | 5.570  | 2.489  |
| H | 9.121  | 5.265  | 2.624  |
| C | 13.603 | -2.131 | -0.027 |
| H | 14.438 | -2.259 | 0.668  |
| H | 13.889 | -1.369 | -0.762 |
| C | 12.362 | -1.706 | 0.741  |
| C | 11.187 | -1.284 | 0.098  |
| H | 11.135 | -1.318 | -0.983 |
| C | 10.094 | -0.787 | 0.811  |
| H | 9.197  | -0.460 | 0.295  |
| C | 10.180 | -0.688 | 2.197  |
| O | 9.121  | -0.109 | 2.919  |
| H | 9.504  | 0.310  | 3.736  |
| C | 12.382 | -1.652 | 2.140  |
| H | 13.261 | -2.002 | 2.674  |
| C | 11.306 | -1.150 | 2.873  |
| H | 11.360 | -1.091 | 3.955  |
| C | 13.044 | 1.885  | -0.056 |
| H | 12.984 | 0.816  | -0.277 |
| H | 13.835 | 2.013  | 0.688  |
| N | 11.604 | 2.536  | 1.870  |
| H | 12.376 | 2.362  | 2.537  |

|    |        |        |        |
|----|--------|--------|--------|
| C  | 11.754 | 2.400  | 0.507  |
| C  | 10.335 | 2.897  | 2.140  |
| H  | 9.947  | 3.045  | 3.134  |
| N  | 9.639  | 3.017  | 1.004  |
| C  | 10.524 | 2.714  | -0.019 |
| H  | 10.213 | 2.747  | -1.048 |
| C  | 4.405  | 1.376  | -0.904 |
| C  | 3.246  | -0.205 | -2.318 |
| H  | 3.050  | -1.213 | -2.663 |
| C  | 4.157  | 0.053  | -1.314 |
| H  | 4.688  | -0.755 | -0.824 |
| C  | 2.542  | 0.857  | -2.909 |
| O  | 1.667  | 0.535  | -3.885 |
| H  | 1.212  | 1.333  | -4.198 |
| C  | 3.693  | 2.433  | -1.494 |
| H  | 3.854  | 3.446  | -1.148 |
| C  | 2.764  | 2.179  | -2.491 |
| H  | 2.204  | 2.993  | -2.937 |
| C  | 5.361  | 1.614  | 0.167  |
| O  | 5.607  | 2.853  | 0.561  |
| C  | 6.342  | 1.306  | 2.681  |
| H  | 6.301  | 0.303  | 3.089  |
| H  | 5.341  | 2.706  | 1.986  |
| O  | 7.541  | 1.806  | 2.434  |
| H  | 8.251  | 1.048  | 2.478  |
| O  | 5.953  | 0.649  | 0.737  |
| O  | 5.351  | 2.093  | 2.850  |
| Fe | 7.644  | 3.144  | 0.778  |

Model <sup>1</sup>P

E=-3130.647515 au ZPE=0.5670300877 au

|   |       |       |        |
|---|-------|-------|--------|
| C | 8.974 | 6.568 | -3.474 |
| H | 8.492 | 7.470 | -3.093 |
| H | 8.724 | 6.478 | -4.534 |
| N | 8.417 | 4.108 | -3.235 |
| H | 8.728 | 3.827 | -4.176 |
| C | 8.497 | 5.380 | -2.709 |
| C | 8.024 | 3.268 | -2.258 |
| H | 7.893 | 2.206 | -2.394 |
| N | 7.837 | 3.935 | -1.118 |
| C | 8.120 | 5.256 | -1.396 |
| H | 8.057 | 6.020 | -0.639 |
| C | 8.029 | 7.737 | 3.886  |
| H | 8.827 | 7.368 | 4.533  |

|   |        |        |        |
|---|--------|--------|--------|
| H | 7.207  | 8.105  | 4.508  |
| N | 6.276  | 6.573  | 2.486  |
| H | 5.578  | 7.321  | 2.629  |
| C | 7.561  | 6.631  | 2.986  |
| C | 6.171  | 5.483  | 1.698  |
| H | 5.269  | 5.205  | 1.178  |
| N | 7.329  | 4.820  | 1.662  |
| C | 8.201  | 5.538  | 2.457  |
| H | 9.227  | 5.235  | 2.565  |
| C | 13.490 | -2.090 | -0.012 |
| H | 14.327 | -2.193 | 0.685  |
| H | 13.763 | -1.332 | -0.754 |
| C | 12.243 | -1.679 | 0.757  |
| C | 11.057 | -1.276 | 0.120  |
| H | 10.997 | -1.320 | -0.961 |
| C | 9.966  | -0.774 | 0.835  |
| H | 9.072  | -0.443 | 0.316  |
| C | 10.062 | -0.653 | 2.219  |
| O | 9.011  | -0.063 | 2.945  |
| H | 9.408  | 0.364  | 3.752  |
| C | 12.270 | -1.607 | 2.155  |
| H | 13.157 | -1.938 | 2.688  |
| C | 11.196 | -1.103 | 2.890  |
| H | 11.259 | -1.031 | 3.971  |
| C | 13.014 | 1.837  | -0.066 |
| H | 12.978 | 0.771  | -0.304 |
| H | 13.791 | 1.969  | 0.691  |
| N | 11.546 | 2.542  | 1.828  |
| H | 12.317 | 2.428  | 2.506  |
| C | 11.704 | 2.318  | 0.478  |
| C | 10.257 | 2.860  | 2.070  |
| H | 9.862  | 3.064  | 3.052  |
| N | 9.561  | 2.866  | 0.929  |
| C | 10.459 | 2.528  | -0.066 |
| H | 10.150 | 2.457  | -1.094 |
| C | 4.467  | 1.413  | -1.161 |
| C | 3.313  | -0.255 | -2.474 |
| H | 3.241  | -1.239 | -2.922 |
| C | 4.421  | 0.133  | -1.749 |
| H | 5.262  | -0.535 | -1.604 |
| C | 2.250  | 0.651  | -2.658 |
| O | 1.221  | 0.241  | -3.425 |
| H | 0.608  | 0.980  | -3.568 |
| C | 3.377  | 2.295  | -1.312 |

|    |       |       |        |
|----|-------|-------|--------|
| H  | 3.401 | 3.273 | -0.847 |
| C  | 2.279 | 1.921 | -2.061 |
| H  | 1.439 | 2.599 | -2.173 |
| C  | 5.640 | 1.827 | -0.441 |
| O  | 5.532 | 2.969 | 0.344  |
| C  | 6.245 | 1.553 | 3.008  |
| H  | 6.381 | 0.817 | 3.810  |
| H  | 5.111 | 2.737 | 1.228  |
| O  | 7.359 | 1.806 | 2.323  |
| H  | 8.084 | 1.089 | 2.484  |
| O  | 6.776 | 1.335 | -0.467 |
| O  | 5.180 | 2.094 | 2.781  |
| Fe | 7.575 | 3.087 | 0.659  |

Model <sup>5</sup>TS3

E=-3130.492209 au

|   |        |        |        |
|---|--------|--------|--------|
| C | 8.950  | 6.502  | -3.543 |
| H | 8.443  | 7.398  | -3.183 |
| H | 8.748  | 6.409  | -4.612 |
| N | 8.430  | 4.022  | -3.278 |
| H | 8.772  | 3.730  | -4.207 |
| C | 8.455  | 5.313  | -2.790 |
| C | 8.010  | 3.200  | -2.296 |
| H | 7.910  | 2.132  | -2.413 |
| N | 7.749  | 3.894  | -1.189 |
| C | 8.015  | 5.216  | -1.497 |
| H | 7.890  | 6.004  | -0.770 |
| C | 7.933  | 8.010  | 3.961  |
| H | 8.714  | 7.633  | 4.625  |
| H | 7.125  | 8.439  | 4.562  |
| N | 6.131  | 6.814  | 2.642  |
| H | 5.436  | 7.569  | 2.778  |
| C | 7.429  | 6.888  | 3.108  |
| C | 6.008  | 5.712  | 1.880  |
| H | 5.094  | 5.410  | 1.395  |
| N | 7.170  | 5.058  | 1.829  |
| C | 8.061  | 5.790  | 2.588  |
| H | 9.088  | 5.485  | 2.679  |
| C | 13.709 | -2.192 | -0.017 |
| H | 14.508 | -2.361 | 0.711  |
| H | 14.047 | -1.427 | -0.727 |
| C | 12.443 | -1.746 | 0.693  |
| C | 11.307 | -1.339 | -0.023 |
| H | 11.323 | -1.382 | -1.104 |

|    |        |        |        |
|----|--------|--------|--------|
| C  | 10.173 | -0.850 | 0.616  |
| H  | 9.315  | -0.519 | 0.040  |
| C  | 10.166 | -0.741 | 2.006  |
| O  | 9.042  | -0.183 | 2.617  |
| H  | 9.319  | 0.296  | 3.441  |
| C  | 12.383 | -1.673 | 2.089  |
| H  | 13.236 | -2.002 | 2.676  |
| C  | 11.257 | -1.179 | 2.752  |
| H  | 11.244 | -1.112 | 3.835  |
| C  | 13.126 | 1.816  | -0.087 |
| H  | 13.058 | 0.753  | -0.330 |
| H  | 13.946 | 1.928  | 0.628  |
| N  | 11.774 | 2.536  | 1.889  |
| H  | 12.576 | 2.395  | 2.530  |
| C  | 11.860 | 2.327  | 0.527  |
| C  | 10.522 | 2.918  | 2.198  |
| H  | 10.181 | 3.115  | 3.201  |
| N  | 9.774  | 2.979  | 1.093  |
| C  | 10.606 | 2.610  | 0.047  |
| H  | 10.247 | 2.584  | -0.968 |
| C  | 4.316  | 1.379  | -0.421 |
| C  | 3.400  | -0.203 | -2.019 |
| H  | 3.312  | -1.201 | -2.431 |
| C  | 4.202  | 0.059  | -0.927 |
| H  | 4.749  | -0.758 | -0.468 |
| C  | 2.649  | 0.835  | -2.608 |
| O  | 1.863  | 0.507  | -3.646 |
| H  | 1.371  | 1.285  | -3.958 |
| C  | 3.564  | 2.411  | -1.039 |
| H  | 3.617  | 3.414  | -0.637 |
| C  | 2.739  | 2.147  | -2.110 |
| H  | 2.147  | 2.942  | -2.551 |
| C  | 5.133  | 1.718  | 0.696  |
| O  | 5.434  | 3.025  | 0.901  |
| C  | 6.105  | 0.810  | 1.460  |
| H  | 5.957  | -0.266 | 1.318  |
| H  | 5.038  | 2.928  | 1.932  |
| O  | 7.418  | 1.180  | 1.100  |
| H  | 8.087  | 0.672  | 1.669  |
| O  | 5.832  | 1.193  | 2.786  |
| O  | 4.509  | 1.806  | 2.551  |
| Fe | 7.707  | 3.307  | 0.820  |

Model <sup>5</sup>A4

E=-3130.528679 au

|   |        |        |        |
|---|--------|--------|--------|
| C | 8.939  | 6.490  | -3.538 |
| H | 8.429  | 7.386  | -3.178 |
| H | 8.737  | 6.397  | -4.607 |
| N | 8.407  | 4.011  | -3.282 |
| H | 8.743  | 3.724  | -4.215 |
| C | 8.446  | 5.300  | -2.786 |
| C | 7.983  | 3.187  | -2.305 |
| H | 7.865  | 2.121  | -2.431 |
| N | 7.733  | 3.877  | -1.192 |
| C | 8.011  | 5.199  | -1.492 |
| H | 7.897  | 5.984  | -0.760 |
| C | 7.908  | 8.003  | 3.955  |
| H | 8.683  | 7.616  | 4.620  |
| H | 7.101  | 8.436  | 4.556  |
| N | 6.124  | 6.853  | 2.570  |
| H | 5.438  | 7.619  | 2.694  |
| C | 7.402  | 6.891  | 3.092  |
| C | 6.003  | 5.755  | 1.802  |
| H | 5.106  | 5.490  | 1.264  |
| N | 7.147  | 5.065  | 1.803  |
| C | 8.023  | 5.773  | 2.601  |
| H | 9.037  | 5.443  | 2.736  |
| C | 13.738 | -2.204 | -0.037 |
| H | 14.548 | -2.375 | 0.677  |
| H | 14.064 | -1.439 | -0.752 |
| C | 12.487 | -1.755 | 0.696  |
| C | 11.339 | -1.339 | 0.004  |
| H | 11.331 | -1.381 | -1.078 |
| C | 10.224 | -0.842 | 0.670  |
| H | 9.355  | -0.502 | 0.114  |
| C | 10.249 | -0.738 | 2.059  |
| O | 9.142  | -0.176 | 2.701  |
| H | 9.444  | 0.308  | 3.515  |
| C | 12.458 | -1.684 | 2.093  |
| H | 13.320 | -2.023 | 2.661  |
| C | 11.352 | -1.183 | 2.781  |
| H | 11.360 | -1.117 | 3.864  |
| C | 13.131 | 1.830  | -0.093 |
| H | 13.058 | 0.766  | -0.335 |
| H | 13.951 | 1.939  | 0.622  |
| N | 11.781 | 2.559  | 1.881  |
| H | 12.583 | 2.415  | 2.522  |
| C | 11.866 | 2.348  | 0.520  |



|    |        |        |        |
|----|--------|--------|--------|
| C  | 10.531 | 2.947  | 2.189  |
| H  | 10.191 | 3.143  | 3.193  |
| N  | 9.783  | 3.010  | 1.084  |
| C  | 10.614 | 2.636  | 0.039  |
| H  | 10.255 | 2.611  | -0.976 |
| C  | 4.319  | 1.300  | -0.290 |
| C  | 3.476  | -0.184 | -2.013 |
| H  | 3.420  | -1.160 | -2.480 |
| C  | 4.250  | 0.028  | -0.879 |
| H  | 4.793  | -0.810 | -0.453 |
| C  | 2.729  | 0.869  | -2.563 |
| O  | 1.974  | 0.592  | -3.653 |
| H  | 1.481  | 1.382  | -3.925 |
| C  | 3.585  | 2.350  | -0.865 |
| H  | 3.608  | 3.334  | -0.415 |
| C  | 2.795  | 2.142  | -1.986 |
| H  | 2.211  | 2.963  | -2.393 |
| C  | 5.077  | 1.543  | 0.968  |
| O  | 5.488  | 2.918  | 1.046  |
| C  | 6.227  | 0.678  | 1.501  |
| H  | 6.213  | -0.382 | 1.231  |
| H  | 5.227  | 3.209  | 1.935  |
| O  | 7.485  | 1.231  | 1.336  |
| H  | 8.192  | 0.694  | 1.839  |
| O  | 5.696  | 0.870  | 2.832  |
| O  | 4.388  | 1.255  | 2.210  |
| Fe | 7.704  | 3.294  | 0.807  |

Model <sup>5</sup>TS4

E=-3130.452583 au

|   |       |       |        |
|---|-------|-------|--------|
| C | 8.933 | 6.483 | -3.528 |
| H | 8.424 | 7.379 | -3.169 |
| H | 8.729 | 6.388 | -4.597 |
| N | 8.412 | 4.003 | -3.265 |
| H | 8.754 | 3.714 | -4.195 |
| C | 8.440 | 5.294 | -2.774 |
| C | 7.982 | 3.181 | -2.288 |
| H | 7.875 | 2.114 | -2.408 |
| N | 7.718 | 3.875 | -1.180 |
| C | 7.994 | 5.196 | -1.483 |
| H | 7.871 | 5.983 | -0.755 |
| C | 7.908 | 8.005 | 3.954  |
| H | 8.684 | 7.619 | 4.619  |
| H | 7.100 | 8.436 | 4.553  |

|   |        |        |        |
|---|--------|--------|--------|
| N | 6.118  | 6.842  | 2.588  |
| H | 5.431  | 7.607  | 2.714  |
| C | 7.403  | 6.890  | 3.093  |
| C | 5.993  | 5.739  | 1.828  |
| H | 5.088  | 5.459  | 1.312  |
| N | 7.141  | 5.056  | 1.817  |
| C | 8.024  | 5.774  | 2.598  |
| H | 9.042  | 5.449  | 2.721  |
| C | 13.759 | -2.214 | -0.039 |
| H | 14.569 | -2.390 | 0.676  |
| H | 14.089 | -1.448 | -0.752 |
| C | 12.509 | -1.762 | 0.693  |
| C | 11.362 | -1.349 | -0.003 |
| H | 11.356 | -1.397 | -1.084 |
| C | 10.246 | -0.849 | 0.658  |
| H | 9.379  | -0.512 | 0.100  |
| C | 10.270 | -0.736 | 2.047  |
| O | 9.165  | -0.166 | 2.679  |
| H | 9.461  | 0.314  | 3.497  |
| C | 12.478 | -1.687 | 2.090  |
| H | 13.338 | -2.026 | 2.660  |
| C | 11.371 | -1.181 | 2.773  |
| H | 11.377 | -1.110 | 3.856  |
| C | 13.125 | 1.830  | -0.089 |
| H | 13.050 | 0.766  | -0.328 |
| H | 13.943 | 1.941  | 0.627  |
| N | 11.773 | 2.562  | 1.882  |
| H | 12.575 | 2.418  | 2.524  |
| C | 11.859 | 2.351  | 0.522  |
| C | 10.523 | 2.951  | 2.190  |
| H | 10.181 | 3.146  | 3.193  |
| N | 9.775  | 3.014  | 1.084  |
| C | 10.607 | 2.640  | 0.040  |
| H | 10.250 | 2.613  | -0.975 |
| C | 4.342  | 1.280  | -0.240 |
| C | 3.470  | -0.169 | -1.975 |
| H | 3.397  | -1.132 | -2.466 |
| C | 4.240  | 0.007  | -0.842 |
| H | 4.776  | -0.840 | -0.424 |
| C | 2.730  | 0.911  | -2.502 |
| O | 1.980  | 0.661  | -3.588 |
| H | 1.486  | 1.455  | -3.856 |
| C | 3.594  | 2.352  | -0.778 |
| H | 3.625  | 3.320  | -0.297 |

|    |       |        |        |
|----|-------|--------|--------|
| C  | 2.800 | 2.177  | -1.895 |
| H  | 2.213 | 3.006  | -2.277 |
| C  | 5.084 | 1.487  | 1.042  |
| O  | 5.486 | 2.878  | 1.148  |
| C  | 6.259 | 0.656  | 1.563  |
| H  | 6.221 | -0.410 | 1.311  |
| H  | 5.282 | 3.117  | 2.068  |
| O  | 7.514 | 1.191  | 1.224  |
| H  | 8.231 | 0.708  | 1.756  |
| O  | 5.966 | 0.886  | 2.925  |
| O  | 4.194 | 1.163  | 2.034  |
| Fe | 7.685 | 3.278  | 0.822  |
